# Supplementary material for: Predictive study of tuberculosis incidence by time series method and Elman neural network in Kashgar, China
Source: PubMed Central journal article supplement — BMJ Open. 2021 Jan 21;11(1):e041040. doi: 10.1136/bmjopen-2020-041040 (PMC7825257; doi:10.1136/bmjopen-2020-041040), 2021-01-21
Supplement: bmjopen-2020-041040.draft_revisions.pdf [file bmjopen-2020-041040.draft_revisions.pdf]

# BMJ Open

BMJ Open is committed to open peer review. As part of this commitment we make the peer review history of every article we publish publicly available.

When an article is published we post the peer reviewers' comments and the authors' responses online. We also post the versions of the paper that were used during peer review. These are the versions that the peer review comments apply to.

The versions of the paper that follow are the versions that were submitted during the peer review process. They are not the versions of record or the final published versions. They should not be cited or distributed as the published version of this manuscript.

BMJ Open is an open access journal and the full, final, typeset and author-corrected version of record of the manuscript is available on our site with no access controls, subscription charges or pay-per-view fees (<http://bmjopen.bmj.com>).

If you have any questions on BMJ Open's open peer review process please email [info.bmjopen@bmj.com](mailto:info.bmjopen@bmj.com)

# BMJ Open

## Predictive study of the tuberculosis incidence by time series method combined with Elman neural network in Kashgar, China

|                               |                                                                                                                                                                                                                                                                                                                                                                                                                                                                                                                                                                                                                                                                                                                                                                                                           |
|-------------------------------|-----------------------------------------------------------------------------------------------------------------------------------------------------------------------------------------------------------------------------------------------------------------------------------------------------------------------------------------------------------------------------------------------------------------------------------------------------------------------------------------------------------------------------------------------------------------------------------------------------------------------------------------------------------------------------------------------------------------------------------------------------------------------------------------------------------|
| Journal:                      | <i>BMJ Open</i>                                                                                                                                                                                                                                                                                                                                                                                                                                                                                                                                                                                                                                                                                                                                                                                           |
| Manuscript ID                 | bmjopen-2020-041040                                                                                                                                                                                                                                                                                                                                                                                                                                                                                                                                                                                                                                                                                                                                                                                       |
| Article Type:                 | Original research                                                                                                                                                                                                                                                                                                                                                                                                                                                                                                                                                                                                                                                                                                                                                                                         |
| Date Submitted by the Author: | 30-May-2020                                                                                                                                                                                                                                                                                                                                                                                                                                                                                                                                                                                                                                                                                                                                                                                               |
| Complete List of Authors:     | Zheng, Yanling; Xinjiang Medical University, College of Medical Engineering and Technology<br>Zhang, Xueliang; Xinjiang Medical University, College of Medical Engineering and Technology, Xinjiang Medical University<br>Wang, Xijiang; Center for Disease Control and Prevention of Xinjiang Uygur Autonomous Region, Center for Disease Control and Prevention of Xinjiang Uygur Autonomous Region, Urumqi 830001, People's Republic of China<br>Wang, Kai; Xinjiang Medical University, College of Medical Engineering and Technology, Urumqi 830054, People's Republic of China<br>Cui, Yan; Center for Disease Control and Prevention of Xinjiang Uygur Autonomous Region, Center for Disease Control and Prevention of Xinjiang Uygur Autonomous Region, Urumqi 830001, People's Republic of China |
| Keywords:                     | International health services < HEALTH SERVICES ADMINISTRATION & MANAGEMENT, Tuberculosis < INFECTIOUS DISEASES, STATISTICS & RESEARCH METHODS                                                                                                                                                                                                                                                                                                                                                                                                                                                                                                                                                                                                                                                            |
|                               |                                                                                                                                                                                                                                                                                                                                                                                                                                                                                                                                                                                                                                                                                                                                                                                                           |

SCHOLARONE™  
Manuscripts

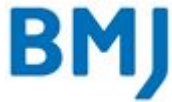

I, the Submitting Author has the right to grant and does grant on behalf of all authors of the Work (as defined in the below author licence), an exclusive licence and/or a non-exclusive licence for contributions from authors who are: i) UK Crown employees; ii) where BMJ has agreed a CC-BY licence shall apply, and/or iii) in accordance with the terms applicable for US Federal Government officers or employees acting as part of their official duties; on a worldwide, perpetual, irrevocable, royalty-free basis to BMJ Publishing Group Ltd ("BMJ") its licensees and where the relevant Journal is co-owned by BMJ to the co-owners of the Journal, to publish the Work in this journal and any other BMJ products and to exploit all rights, as set out in our [licence](#).

The Submitting Author accepts and understands that any supply made under these terms is made by BMJ to the Submitting Author unless you are acting as an employee on behalf of your employer or a postgraduate student of an affiliated institution which is paying any applicable article publishing charge ("APC") for Open Access articles. Where the Submitting Author wishes to make the Work available on an Open Access basis (and intends to pay the relevant APC), the terms of reuse of such Open Access shall be governed by a Creative Commons licence – details of these licences and which [Creative Commons](#) licence will apply to this Work are set out in our licence referred to above.

Other than as permitted in any relevant BMJ Author's Self Archiving Policies, I confirm this Work has not been accepted for publication elsewhere, is not being considered for publication elsewhere and does not duplicate material already published. I confirm all authors consent to publication of this Work and authorise the granting of this licence.

1  
2  
3  
4 Predictive study of the tuberculosis incidence by time series  
5  
6 method combined with Elman neural network in Kashgar, China  
7

8 Yanling Zheng<sup>1</sup>, XueLiang Zhang<sup>1\*</sup>, XiJang Wang<sup>2</sup>, Kai Wang<sup>1</sup>, Yan Cui<sup>2\*</sup>

9  
10 1. College of Medical Engineering and Technology, Xinjiang Medical University,  
11 Urumqi 830054, People's Republic of China  
12

13  
14 2. Center for Disease Control and Prevention of Xinjiang Uygur Autonomous Region,  
15 Urumqi 830001, People's Republic of China  
16  
17  
18  
19  
20  
21  
22  
23  
24  
25  
26  
27  
28  
29  
30  
31  
32  
33  
34  
35  
36  
37  
38  
39  
40  
41  
42  
43  
44  
45  
46  
47  
48  
49  
50  
51

52 **Abstract:**  
53  
54

55  
56 Yanling Zheng: 31372687@qq.com

57 XiJang Wang: 79057023@qq.com

58 Kai Wang: zhub168\_math@sina.com,

59 Xueliang Zhang : \* Corresponding author, zhengyl\_math@sina.cn

60 Yan Cui : \* Corresponding author, cuiyan\_jk@sina.com

1  
2  
3  
4 **Objective:** Kashgar has the highest tuberculosis (TB) incidence in China. The task of  
5 TB prevention and control in Kashgar is very serious. However, there is little  
6 quantitative prediction study on the TB incidence in this area, therefore, it is urgent to  
7 accurately predict the TB incidence in Kashgar, which can provide scientific reference  
8 for the prevention and control of TB.  
9  
10

11  
12  
13 **Methods:**Based on the TB incidence in Kashgar, a single Box-Jenkins model and  
14 Box-Jenkins model combined with Elman neural network model were used to do  
15 prediction analysis of TB incidence in Kashgar. Root mean squared error (RMSE),  
16 mean absolute error (MAE) was used to measure the prediction accuracy.  
17  
18  
19

20  
21 **Results:** The single AR((1, 2, 8)) model was established, the AIC, SC and  $R^2$  of the  
22 model were 6.53, 6.61 and 0.47 respectively. In order to improve the prediction  
23 accuracy of AR ((1, 2, 8)) model, we used Elman neural network to further extract the  
24 nonlinear information of AR ((1, 2, 8)) model, then, the AR ((1, 2, 8)) combined  
25 Elman neural network model (AR-Elman) was established, its  $R^2$  was 0.83. Based  
26 on the AR-Elman model, the TB incidence were fitted and predicted, the fitting  
27 RMSE and MAE were 3.78 and 3.38 respectively, the predicting RMSE and MAE  
28 were 8.86 and 7.29 respectively.  
29  
30  
31  
32  
33  
34  
35

36  
37 **Conclusions:** Both the single AR((1,2,8)) model and AR-Elman model can be used to  
38 predict the TB incidence in Kashgar, but the fitting and predicting RMSE and MAE  
39 by AR-Elman model were smaller than that by AR((1,2,8)) model, and the  $R^2$  of  
40 AR-Elman model was higher than that of AR((1,2,8)) model, which indicated that  
41 AR-Elman model was better than AR((1,2,8)) model. The AR-Elman model is used to  
42 predict the future TB incidence in Kashgar, which can provide help for the planning  
43 of health resources in this area in advance.  
44  
45  
46  
47  
48  
49

50 **Keywords:** Tuberculosis; Prediction; Box-Jenkins method; Elman neural network  
51  
52  
53

#### 54 **Strengths and limitations of this study:**

- 55 1. Kashgar has the highest tuberculosis (TB) incidence in China. However, there is  
56 little quantitative prediction study on the TB incidence in this area, therefore, it is  
57 urgent to do the prediction analysis of TB in Kashgar.  
58  
59  
60

- 1  
2  
3  
4  
5  
6  
7  
8  
9  
10  
11  
12  
13  
14  
15  
16  
17  
18  
19  
20
2. In the study, the feasibility of predicting TB incidence in Guangxi by Box-Jenkins model and Box-Jenkins model combined with Elman neural network model were discussed respectively, finally, AR-Elman model with high prediction accuracy was established, it can be used to predict the development of TB so as to prevent its outbreak and provide help for the planning of health resources in advance in Kashgar.
  3. This study did not consider possible influencing factors related to TB, such as Climatic factors, environmental factors, demographic factors and political issues, etc.

## 21 **Introduction**

22  
23  
24  
25  
26  
27  
28  
29  
30  
31  
32  
33  
34  
35  
36  
37  
38  
39  
40  
41  
42  
43  
44  
45  
46  
47  
48  
49  
50  
51  
52  
53  
54  
55  
56  
57  
58  
59  
60

Tuberculosis (TB) is still a major global public health problem and the ninth leading cause of death in the world.<sup>1-3</sup> Because TB is contagious, patient resistance is low, treatment time is long, patients' labor force is lost and their contribution to society is reduced, so TB brings great burden to society and economy. All countries in the world are working hard to fight tuberculosis. In 2018, the number of new reported TB cases was about 10 million; this figure has remained relatively stable in recent years. The latest treatment results showed that the global TB treatment success rate was 83%. WHO has set targets for the stop TB strategy. The targets mentioned that by 2030, on the basis of the work in 2015, TB deaths will reduce by 90%, and TB incidences will reduce (annual new cases) by 80%.<sup>4</sup> In order to achieve these goals, TB prevention and control services must be provided in the broad context of universal health coverage, joint action must be taken to address the social and economic consequences of TB, and technological breakthroughs should be achieved by 2025 to make the TB incidence decline faster than that at any time in history. According to the latest WHO report, China ranks third in the world after India and Indonesia in the number of new TB cases.<sup>4</sup> The TB incidence in western China was much higher than that in eastern and central China. The province with the highest TB incidence in the west is Xinjiang province. From 2016 to 2017, the annual TB incidence in Xinjiang was 185.66/100,000 and 202.58/100,000, while the annual TB incidence from 2016 to 2017 in China was 61/100,000 and 60.53/100,000, respectively, it is nearly three

1  
2  
3  
4 times higher in Xinjiang than that in China.

5  
6 There are 14 Prefectural-Level cities in Xinjiang, China, among which Kashgar  
7 has the highest TB incidence rate. From 2016 to 2017, the annual TB incidences in  
8 Kashgar were 427.44/100,000 and 465.33/100,000, respectively, which were nearly 7  
9 times higher than that of the national level. Doing a good job in the prevention and  
10 control of TB in Kashgar is an important link to reduce the TB incidence in Xinjiang.  
11  
12

13  
14  
15 Mastering the changing law of the incidence of infectious diseases, using the  
16 existing surveillance data to analyze, then, to predict the possible epidemic trend and  
17 provide reference data for the prevention, can better control the occurrence and  
18 epidemic of infectious diseases. Prediction of infectious diseases is to predict the  
19 occurrence, development and epidemic trend of infectious diseases according to the  
20 occurrence, development law and related factors of infectious diseases, combined  
21 with analysis and judgment and mathematical model, etc. At present, the popular  
22 analysis and prediction methods include time series analysis, neural network  
23 prediction method and so on. Time series Box-Jenkins method has been widely used  
24 in the prediction and analysis of infectious diseases in recent years<sup>5-16</sup>, it can control  
25 the long-term trend, seasonality, periodicity and other factors. Neural network has  
26 strong nonlinear mapping ability, in which Elman neural network is composed of  
27 input layer, hidden layer, connection layer and output layer. The network has dynamic  
28 memory function and is very suitable for time series prediction. At present, the  
29 network is widely used in various fields, and has achieved successful prediction  
30 results.<sup>17-21</sup>  
31  
32  
33  
34  
35  
36  
37  
38  
39  
40  
41  
42  
43  
44  
45

46 The TB incidence in Kashgar, Xinjiang is almost the highest in China, and it is  
47 urgent to do a good job in the prevention and control of TB in this area. Accurate  
48 prediction of TB incidence is a prerequisite for prevention and control. In this study,  
49 the popular Box-Jenkins time series method was used to found model for predicting  
50 the TB incidences in Kashgar, in order to improve the prediction accuracy, the Elman  
51 neural network with strong nonlinear information capture ability was used to  
52 construct the combined model for prediction analysis.  
53  
54  
55  
56  
57  
58  
59  
60

## Materials and Methods

### Study area and data Sources

We selected Kashgar as the study site (see Figure 1). This city is located in the south of Xinjiang province in China with an area of approximately 16.2 thousand square kilometers and a permanent population of 4.64 million in 2018. TB case data from January 2005 to December 2017 were obtained from the Center for Disease Control and Prevention of Xinjiang Uygur Autonomous Region. Population data were obtained from Xinjiang Bureau of Statistics. Based on the population data and TB case data, we calculated the incidence data of TB.

### Patient and public involvement

Patients were not involved in the design of this study as it involved only observational analysis of an anonymised, pre-existing, routinely collected dataset.

### Autoregressive moving average (ARMA) model<sup>22</sup>

ARMA model is an important time series analysis and prediction model in Box-Jenkins method, also known as auto-regression moving average model. The ARMA (p,q) model is a model with autocorrelation order p and moving average order q, p and q are judged by autocorrelation function (ACF) and partial autocorrelation function (PACF) diagram of stationary data. If the original data is stable, the autocorrelation coefficients are trailing, and the partial correlation coefficients are the p-order truncated, then q=0, the ARMA(p,q) model is recorded as AR(p), and its expression is as follows:

$$X_t = c + \phi_1 X_{t-1} + \phi_2 X_{t-2} + \dots + \phi_p X_{t-p} + \varepsilon_t$$



Where,  $X_t$  is the observed value at t,  $\phi_1, \dots, \phi_p$  are model parameters, C is a constant, if only  $\phi_1, \phi_2, \phi_p$  are not zeros, then, The AR(p) model becomes a sparse model, which can be recorded as AR((1,2, p)).

If the original data is stable, the autocorrelation coefficients are q-order truncated and the partial correlation coefficients are trailing, then p=0 and the ARMA(p,q) model becomes MA(q), its expression is as follows:

$$X_t = \mu + \varepsilon_t + \theta_1 \varepsilon_{t-1} + \theta_2 \varepsilon_{t-2} + \dots + \theta_q \varepsilon_{t-q}$$

Where,  $\mu$  is the expected value of  $X_t$ .  $\theta_1, \dots, \theta_p$  are model parameters.

If the original data is stable, the autocorrelation coefficients are trailing, and the partial correlation coefficients are also trailing, then the expression of the ARMA (p, q) model is as follows:

$$X_t = c + \phi_1 X_{t-1} + \phi_2 X_{t-2} + \dots + \phi_p X_{t-p} + \varepsilon_t - \theta_1 \varepsilon_{t-1} - \theta_2 \varepsilon_{t-2} - \dots - \theta_q \varepsilon_{t-q}$$

There are four main steps in ARMA modeling:

First step. The prerequisite for ARMA modeling is the stationary of time series. Check whether the data is stable by Augmented Dickey-Fuller (ADF) unit root test, in this study, the significant level probability (Prob) is 0.05, and if the Prob is less than 0.05, then, the data is stable. By observing the autocorrelation function (ACF) and partial function (PACF) of the stable data, we can determine the possible values of p and q and establish the possible ARMA (p, q) model.

Second step. The parameters of ARMA(p, q) model are estimated by maximum likelihood estimation or least square estimation, and the model parameters are tested. If Prob is less than 0.05, the parameters have statistical significance. The best model

is determined according to the value of AIC, SC and  $R^2$  of model. The smaller AIC and SC are, the larger the R square is, and the better the model is.

Third step. To determine whether the established ARMA (p, q) model is suitable. The residual sequence of a suitable model shall be the white noise process, and its ACF and PACF coefficients should be within twice the standard deviation range, otherwise, it is considered that the extraction information of the established model is not sufficient, and it is necessary to consider improving the accuracy of the model.

Fourth step. Using the established model for prediction and analysis

### **Elman neural network model<sup>23</sup>**

The Elman neural network is proposed by Elman in 1990. The model is generally divided into four layers: input layer, hidden layer, receiving layer and output layer. The characteristic of Elman network is that the output of the hidden layer is connected to the input of the hidden layer through the delay and storage of the receiving layer, which makes it sensitive to the data of the historical state. The addition of the internal feedback network increases the ability of the network itself to deal with dynamic information, thus achieving the purpose of dynamic modeling.

The mathematical structure of the Elman neural network is as follows:

$$x(k) = f(w^1 x_c(k) + w^2 u(k-1))$$

$$x_c(k) = \alpha x_c(k-1) + x(k-1)$$

$$y(k) = g(w^3 x(k))$$

Where,  $w^1$  is the connection weight matrix between the contact unit and the hidden layer unit,  $w^2$  is the connection weight matrix between the input unit and the hidden layer unit,  $w^3$  is the connection weight matrix between the hidden layer unit and the output unit.  $x_c(k)$  and  $x(k)$  represent the output of the contact unit and the hidden layer unit, respectively,  $y(k)$  represents the output of the output unit,  $\alpha$  is a

self-connected feedback gain factor,  $1 \leq \alpha < 0$ ,  $f(x)$  often takes the sigmoid function

There are four main steps in Elman neural network modeling:

First step. Data standardization processing.

Second step. Determine the input layer, the output layer.

Third step. To determine the number of neurons in the hidden layer, so that the error of the established Elman model is minimized. At present, there is no ideal analytical expression for the number of neurons in the hidden layer. The number of neurons has a great influence on the performance of the network. When the number of neurons is too large, it will lead to that the network learning time is too long, the generalization performances are not good, and even the convergence failure, but when the number of neurons is too small, the fault-tolerant ability of the network is poor. In general, the number of neurons does not exceed 20.<sup>23</sup> In this study, matlab cyclic structure was used to find the optimal number of neurons by comparing the RMSE values of Elman networks with neurons 1 to 20.

Fourth step. According to the optimal number of neurons in the hidden layer, the Elman model is constructed, and then the prediction and analysis are made.

### Model comparison

Two performance indexes, root mean squared error (RMSE), mean absolute error (MAE) were used to assess the fitting and forecasting accuracy of two models. The smaller these two values are, the better the model is.

### Statistical software

All data analyses were conducted using Eviews7, matlab2015b, Arcmap10.1.

### Results

From January 2005 to December 2017, the number of reported TB cases is 141984 in Kashgar, Xinjiang, the average annual TB cases were 7888 and the average annual incidence was 191.18. Figure 2 shows the time series map of the TB incidences. It can be seen from the figure that the trend of the annual TB incidence is

1  
2  
3  
4 similar, and the TB incidence from 2014 to 2017 were significantly higher than that of  
5  
6 previous years.

7  
8 The data of TB incidences from January 2005 to December 2017 were divided  
9  
10 into two parts. The data from January 2005 to December 2016 were used to found  
11  
12 model and the data from January 2017 to December 2017 were used to test the model.

### 13 14 **Establishment of ARMA Model**

15  
16 ARMA Modeling requires data stability, so, first of all, the stability of the  
17  
18 modeling part of the data is verified by ADF test. The results of ADF test showed  
19  
20 that Prob was less than 0.05(see Table 1), which indicated that the data was stable and  
21  
22 could be directly used to found the model. Secondly, the ACF and PACF diagrams of  
23  
24 the modeling part of the data were done (see Figure 3), It is obvious from the diagram  
25  
26 that the autocorrelation coefficients are trailing distribution, and the partial  
27  
28 correlation coefficients are almost a second-order truncated distribution, only at the  
29  
30 lag of 7, 8 and 9, the correlation coefficients are a little large. Based on this situation,  
31  
32 we considered establishing four models, such as AR(2), AR((1,2,7)), AR((1,2,8)) and  
33  
34 AR((1,2,9)), The least square method was used to test the parameters of the four  
35  
36 models. The results of the test were shown in Table 2; we can see that, of the four  
37  
38 models, only AR (2) model and AR((1,2,8)) passed the parameter test. Comparing  
39  
40 the two models, it was found that, the AR((1,2,8)) had smaller AIC and SC values,  
41  
42 and the  $R^2$  values of AR((1,2,8))were larger than the  $R^2$  values of AR (2), so the AR  
43  
44 (2) model was abandoned. The residual analysis of the AR((1,2,8)) model was carried  
45  
46 out. The autocorrelation and partial correlation coefficient of the residuals were  
47  
48 almost all within two times standard deviation, and only in the lag 5,6,12 order, they  
49  
50 were beyond the range of two times standard deviation (see Figure 4), which indicated  
51  
52 that the AR((1,2,8)) model could be used to roughly predict the TB incidences in  
53  
54 Kashgar. We used AR((1,2,8)) model to fit the TB incidence from September 2005 to  
55  
56 December 2016, the fitting RMSE and MAE were 6.15 and 4.33, respectively; we  
57  
58 used AR((1,2,8)) model to predict the TB incidence from January 2017 to December  
59  
60 2017, the prediction RMSE and MAE were 10.88 and 8.75 respectively.

## Establishment of AR-Elman Model

In order to improve the prediction accuracy of the AR((1,2,8)) model, we tried to establish the AR-Elman model. The fitting sequence of AR((1,2,8)) model was used as input variable, and the actual TB incidence was used as output variable. Due to the similarity of the annual trend of TB incidence in Kashgar (see Figure 1), therefore, we created twelve time-lagged variables as input features. Supposing that  $x_t$  represented the TB incidence at time  $t$ , and then the input matrix and the output matrix of the modeling data set used in this study were written as follows:

$$\text{input matrix} = \begin{bmatrix} x_1 & x_2 & \square & x_{12} \\ x_2 & x_3 & \square & x_{13} \\ \square & \square & \square & x_{14} \\ x_{t-12} & x_{t-11} & \square & x_{t-1} \end{bmatrix}, \text{output matrix} = \begin{bmatrix} x_{13} \\ x_{14} \\ \square \\ x_t \end{bmatrix}$$

We selected twelve as the number of input layers of Elman and one as the number of output layers representing the forecast value. Through the matlab cyclic structure, we selected the optimal number of neurons between 1 and 20, and finally determined that the number of neurons was 6 (see Figure 5), the RMSE was the smallest, and the AR-Elman was optimal. We used the AR-Elman model to fit the training data, the RMSE was 3.78, the MAE was 3.38, and the  $R^2$  of the model was 0.83; we used the AR-Elman model to predict the TB incidence from January 2017 to December 2017, the RMSE was 8.86, and the MAE was 7.29. The fitting diagram of AR((1,2,8)) model and AR-Elman model was shown in Figure 6.

## Discussion

According to the WHO 2019 Global Tuberculosis report, around the world, TB mortality was down about 3% every year, the incidence was down about 2% every year, 16% of TB patients died of the disease.<sup>4</sup> But the rate of decline has not reached the pace of the stop Tuberculosis Strategy plan. Therefore, it is necessary to strengthen the prevention and control of tuberculosis. In order to significantly narrow these gaps, greater progress must be made in a group of countries with a high burden of tuberculosis. The burden of TB in China ranks second in the world, and Xinjiang is the province with the highest incidence of TB in China, and Kashgar is the area

1  
2  
3  
4 with the highest TB incidences in Xinjiang. Therefore, it is urgent to do a good job in  
5 the prevention and control of TB in Kashgar.  
6

7  
8 The prediction and early warning of infectious diseases is an important link in  
9 the prevention and control of infectious diseases.<sup>24-26</sup> Therefore, this study carried  
10 out research from the point of view of prediction to explore an accurate prediction  
11 model and do prediction and analysis of TB incidence in Kashgar, so as to provide  
12 scientific reference for the prevention and control of the disease in this area. The Box  
13 - Jenkins method is a popular time series prediction method, this method has good  
14 prediction performance and high prediction accuracy; Elman Neural network can  
15 capture nonlinear information of time series data very well. In this study, the two  
16 methods were combined to study the prediction model of TB incidence in Kashgar.  
17 First of all, a single prediction model was established by Box-Jenkins method, which  
18 requires the data to be stable. The probability value tested by ADF unit root was less  
19 than 0.05, which indicated that the data was stable and could be directly used for  
20 modeling. Based on the ACF and PACF diagrams of stationary data, we established  
21 four models, then we tested the parameters of the four models by means of the least  
22 square method and calculated the AIC and SC values of these models, finally, we  
23 found that all parameters of AR((1,2,8)) model passed the test, and the AIC and SC of  
24 AR((1,2,8)) model were the smallest, so the AR((1,2,8)) model was the best model, its  
25 residual errors were basically within twice the standard deviation, which indicated  
26 that the AR((1,2,8)) model was feasible. We used this model to fit the TB incidence,  
27 the fitting RMSE was 6.15, the fitting MAE was 4.33, we used the model to predict  
28 the TB incidence in Kashgar from January 2017 to December 2017, the predicting  
29 RMSE was 10.88, the predicting MAE was 8.75. In order to improve the prediction  
30 accuracy of the model, we tried to establish the AR-Elman combination model. The  
31 TB incidences fitted by AR((1,2,8)) were used as the input data of Elman network,  
32 and the actual incidences were used as the output data of Elman network. The Matlab  
33 cyclic structure was used to find the optimal neuron from 1 to 20, when the number of  
34 neurons was 6, the fitting error of the Elman neural network was the smallest;  
35 therefore, the model was the best, we called the model AR-Elman combination model.  
36  
37  
38  
39  
40  
41  
42  
43  
44  
45  
46  
47  
48  
49  
50  
51  
52  
53  
54  
55  
56  
57  
58  
59  
60

We used the AR-Elman model to fit the TB incidence, the fitting RMSE was 3.78, the fitting MAE was 3.38, we used the AR-Elman model to predict the TB incidence in Kashgar from January 2017 to December 2017, the predicting RMSE was 8.86, the predicting MAE was 7.29. Both the fitting RMSE and MAE and the predicting RMSE and MAE of the AR-Elman model were smaller than those of the single AR((1,2,8)) model, which indicated that the combined model established in this study was more suitable for predicting the TB incidence in Kashgar.

## Conclusions

The TB incidence in Kashgar, Xinjiang is almost the highest in China, in order to provide some help for the prevention and control of this disease in this area, in this paper, the prediction problem of the TB incidence was studied. Firstly, a single AR((1,2,8)) prediction model was established by using Box-Jenkins method, and its fitting and prediction performance were good, secondly, In order to improve the prediction accuracy of the single AR((1,2,8)) model, we combined single AR((1,2,8)) with Elman neural network with strong ability to capture nonlinear information to establish AR-Elman combination model. The fitting and prediction accuracy of the combined model was higher than that of the single AR((1,2,8)) model. The AR-Elman combined model can provide scientific help for predicting and warning the TB incidence in Kashgar, Xinjiang. This study also has some limitations, we did not consider possible influencing factors related to TB, such as climatic factors and political issues, etc, in further studies, we will consider these factors.

## Competing interests

The authors declare no conflict of interest.

## Funding

This work was supported by Major projects of science and technology in Xinjiang Autonomous region (2017A03006), China.

## Author contributions

1  
2  
3 YLZ analysed the data and wrote the manuscript. XLZ, XJW, KW and YC  
4 wrote and revised the manuscript. All authors read and approved the final manuscript.  
5  
6

## 7 **Acknowledgements**

8  
9 We would like to express our gratitude to anonymous peer reviewers for  
10 carefully revising our manuscript and for his or her useful comments.  
11  
12

## 13 **References**

- 14  
15 1. Kemal J, Sibhat B, Abraham A, et al. Bovine tuberculosis in eastern Ethiopia:  
16 prevalence, risk factors and its public health importance. *BMC Infectious Diseases*,  
17 2019, 19(1).  
18  
19
- 20 2. Tilahun M, Ameni G, Desta K, et al. Molecular epidemiology and drug sensitivity  
21 pattern of *Mycobacterium tuberculosis* strains isolated from pulmonary  
22 tuberculosis patients in and around Ambo Town, Central Ethiopia. *Plos One*, 2018,  
23 13(2):e0193083-  
24  
25
- 26 3. Reta A, Simachew A. The Role of Private Health Sector for Tuberculosis Control  
27 in Debre Markos Town, Northwest Ethiopia. *Advances in Medicine*, 2018,  
28 2018(2):1-8.  
29  
30
- 31 4. WHO. Global tuberculosis report 2019, [https://www.who.int/tb/publications/  
32 global\\_report/en/](https://www.who.int/tb/publications/global_report/en/). (Accessed on 17 Oct 2019).  
33  
34
- 35 5. Aryee, Kwarteng , Essuman, Nkansa Agyei, et al. Estimating the incidence of  
36 tuberculosis cases reported at a tertiary hospital in Ghana: a time series model  
37 approach. *BMC Public Health*.2018, 18(1):1292.  
38  
39
- 40 6. Tohidinik H R , Mohebalı M , Mansournia M A, et al. Forecasting zoonotic  
41 cutaneous leishmaniasis using meteorological factors in eastern Fars province, Iran:  
42 A SARIMA Analysis. *Tropical Medicine & International Health*, 2018,  
43 23(8):860–869.  
44  
45
- 46 7. Ouedraogo B, Inoue Y, Kambiré A, et al. Spatio-temporal dynamic of malaria in  
47 Ouagadougou, Burkina Faso, 2011–2015. *Malaria Journal*, 2018, 17(1):138.  
48  
49
- 50 8. Martínezbello D A, Lópezquílez A, Torresprieto A. Bayesian dynamic modeling of  
51 time series of dengue disease case counts. *Plos Neglected Tropical Diseases*, 2017,  
52 11(7):e0005696.  
53  
54  
55  
56  
57  
58  
59  
60



- 1  
2  
3  
4 9. Wagenaar B H, Augusto O, Beste J, et al. The 2014–2015 Ebola virus disease  
5 outbreak and primary healthcare delivery in Liberia: Time-series analyses for  
6 2010–2016. *Plos Medicine*, 2018, 15(2):e1002508.  
7  
8
- 9  
10 10. Liu S, Chen J, Wang J, et al. Predicting the outbreak of hand, foot, and mouth  
11 disease in Nanjing, China: a time-series model based on weather variability.  
12 *International Journal of Biometeorology*, 2017(6):1-10.  
13  
14
- 15  
16 11. Anokye R, Acheampong E, Owusu I, et al. Time series analysis of malaria in  
17 Kumasi: Using ARIMA models to forecast future incidence. *Cogent Social*  
18 *Sciences*, 2018, 4(1):1461544.  
19  
20
- 21  
22 12. Wang Y W , Shen Z Z , Jiang Y . Comparison of autoregressive integrated moving  
23 average model and generalised regression neural network model for prediction of  
24 haemorrhagic fever with renal syndrome in China: a time-series study. *Bmj Open*,  
25 2019, 9(6):e025773.  
26  
27
- 28  
29 13. Guo W L , Geng J , Zhan Y , et al. Forecasting and predicting intussusception in  
30 children younger than 48 months in Suzhou using a seasonal autoregressive  
31 integrated moving average model. *Bmj Open*, 2019, 9(1).  
32  
33
- 34  
35 14. Gabriel A F B , Alencar A P , Miraglia S G E K . Dengue outbreaks: unpredictable  
36 incidence time series. *Epidemiology & Infection*, 2019, 147  
37  
38
- 39  
40 15. Tian C W , Wang H , Luo X M . Time-series modelling and forecasting of hand,  
41 foot and mouth disease cases in China from 2008 to 2018. *Epidemiology &*  
42 *Infection*, 2019, 147  
43  
44
- 45  
46 16. Juang W C , Huang S J , Huang F D , et al. Application of time series analysis in  
47 modelling and forecasting emergency department visits in a medical centre in  
48 Southern Taiwan[J]. *Bmj Open*, 2017, 7(11):e018628  
49  
50
- 51  
52 17. Yu C, Li Y, Zhang M. An improved Wavelet Transform using Singular Spectrum  
53 Analysis for wind speed forecasting based on Elman Neural Network. *Energy*  
54 *Conversion & Management*, 2017, 148:895-904.  
55  
56
- 57  
58 18. Huang Y, Shen L. Elman Neural Network Optimized by Firefly Algorithm for  
59 Forecasting China's Carbon Dioxide Emissions. *Communications in Computer*  
60 *and Information Science*, 2018(951): 36-47.

- 1  
2  
3  
4 19. Alkhasawneh M S. Hybrid Cascade Forward Neural Network with Elman Neural  
5  
6 Network for Disease Prediction. *Arabian Journal for Science and Engineering*,  
7  
8 2019, 44(11): 9209–9220.
- 9  
10 20. Mehrgini B, Izadi H, Memarian H. Shear wave velocity prediction using Elman  
11  
12 artificial neural network. *Carbonates & Evaporites*, 2017(6):1-11.
- 13  
14 21. Khalaf M, Hussain A J, Keight R, et al. Machine learning approaches to the  
15  
16 application of disease modifying therapy for sickle cell using classification  
17  
18 models. *Neurocomputing*, 2017, 228(C):154-164.
- 19  
20 22. Box G E, Jenkins G M. *Time series analysis: forecasting and control rev. ed.*  
21  
22 Oakland, California, Holden-Day, 1976, 31(4):238-242.
- 23  
24 23. Ming Cheng. *The principle and example of MATLAB neural network.* Tsinghua  
25  
26 University Press, 2013.
- 27  
28 24. Huppert A, Katriel G. Mathematical modelling and prediction in infectious  
29  
30 disease epidemiology. *Clin Microbiol Infect.* 2013, 19(11):999-1005
- 31  
32 25. Wearing HJ1, Rohani P, Keeling MJ. Appropriate models for the management of  
33  
34 infectious diseases. *PLoS Med.* 2005, 2(7):e174.
- 35  
36 26. Neuberger A, Paul M, Nizar A, Raoult D. Modelling in infectious diseases:  
37  
38 between haphazard and hazard. *Clin Microbiol Infect.* 2013, 19(11):993-8.
- 39  
40  
41  
42  
43  
44  
45  
46  
47  
48  
49  
50  
51  
52  
53  
54  
55  
56  
57  
58  
59  
60

## Figures

**Figure 1.** The red part of this picture is the location of kashgar in Xinjiang, China.

**Figure 2.** Graph of the TB incidences in Kashgar from January 2005 to December 2017

**Figure 3.** The ACF and PACF diagrams of modeling data

**Figure 4.** The ACF and PACF graphs of residual errors of AR((1,2,8)) Model

**Figure 5.** The numbers of neurons in AR-Elman Model and the corresponding RMSE Values

**Figure 6.** Fitting comparison Diagram of AR((1,2,8))Model and AR-Elman Model

## Tables

**Table 1.** The ADF test of the training data

|                                               | t-Statistic  | Prob-value  |
|-----------------------------------------------|--------------|-------------|
| <b>Augmented Dickey-Fuller test statistic</b> | <b>-3.47</b> | <b>0.01</b> |
| <b>Test critical values:</b>                  |              |             |
| 1% level                                      | <b>-3.48</b> |             |
| 5% level                                      | <b>-2.88</b> |             |
| 10% level                                     | <b>-2.58</b> |             |

**Table 2** Parameter estimates of the tentative models with their AIC and SC

| Model         | Variable | Coefficient | Std. Error | t-Statistic | Prob  | AIC  | SC   |
|---------------|----------|-------------|------------|-------------|-------|------|------|
|               | C        | 21.42       | 2.17       | 9.86        | <0.01 |      |      |
| AR (2)        | AR(1)    | 0.42        | 0.08       | 5.20        | <0.01 | 6.55 | 6.62 |
|               | AR(2)    | 0.34        | 0.08       | 4.17        | <0.01 |      |      |
|               | C        | 22.93       | 3.73       | 6.14        | <0.00 |      |      |
| AR((1, 2, 7)) | AR(1)    | 0.41        | 0.08       | 5.10        | <0.00 | 2.87 | 3.00 |
|               | AR(2)    | 0.32        | 0.08       | 3.88        | <0.00 |      |      |
|               | AR (7)   | 0.12        | 0.007      | 1.74        | 0.08  |      |      |

|               |        |       |       |      |       |      |      |
|---------------|--------|-------|-------|------|-------|------|------|
|               | C      | 23.53 | 4.56  | 5.16 | <0.01 |      |      |
| AR((1, 2, 8)) | AR(1)  | 0.40  | 0.08  | 4.84 | <0.01 | 6.53 | 6.61 |
|               | AR(2)  | 0.32  | 0.08  | 3.96 | <0.01 |      |      |
|               | AR (8) | 0.15  | 0.07  | 2.17 | 0.03  |      |      |
|               | C      | 29.07 | 15.53 | 1.87 | 0.06  |      |      |
| AR((1, 2, 9)) | AR(1)  | 0.37  | 0.08  | 4.64 | <0.01 | 6.46 | 6.55 |
|               | AR (2) | 0.31  | 0.08  | 3.93 | <0.01 |      |      |
|               | AR (9) | 0.26  | 0.07  | 3.80 | <0.01 |      |      |
|               | C      |       |       |      |       |      |      |

1  
2  
3  
4  
5  
6  
7  
8  
9  
10  
11  
12  
13  
14  
15  
16  
17  
18  
19  
20  
21  
22  
23  
24  
25  
26  
27  
28  
29  
30  
31  
32  
33  
34  
35  
36  
37  
38  
39  
40  
41  
42  
43  
44  
45  
46  
47  
48  
49  
50  
51  
52  
53  
54  
55  
56  
57  
58  
59  
60

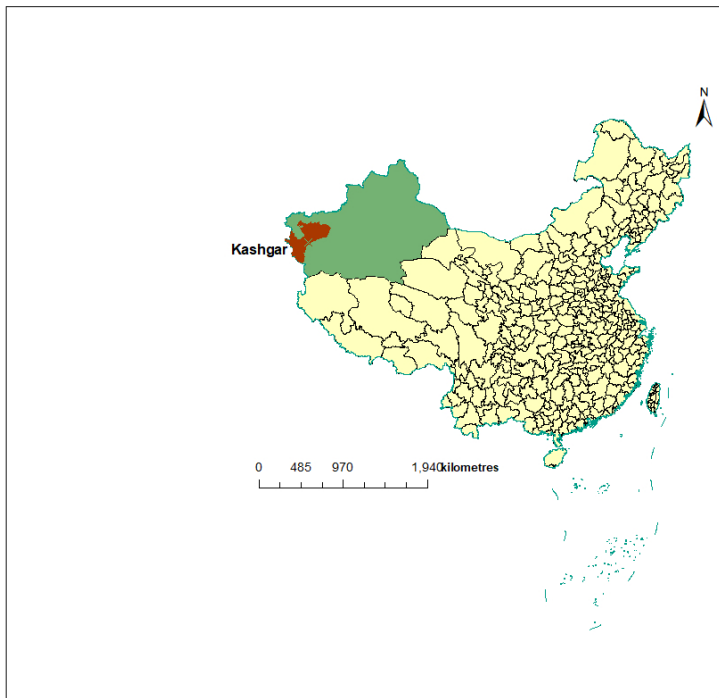

Figure 1. The red part of this picture is the location of kashgar in Xinjiang, China.

296x210mm (96 x 96 DPI)

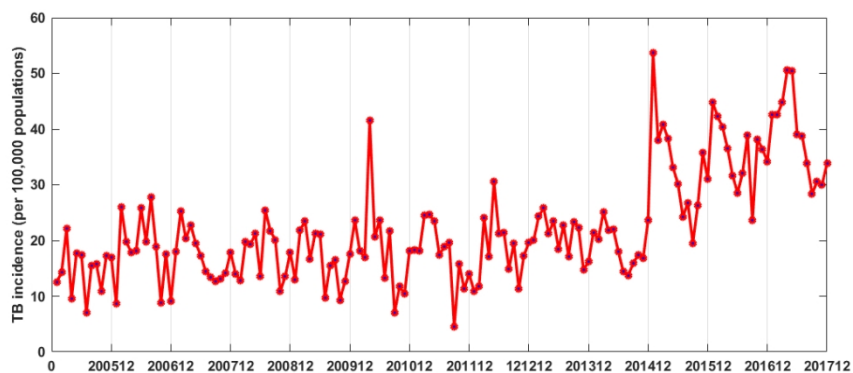

Figure 2. Graph of the TB incidences in Kashgar from January 2005 to December 2017

320x128mm (96 x 96 DPI)

1  
2  
3  
4  
5  
6  
7  
8  
9  
10  
11  
12  
13  
14  
15  
16  
17  
18  
19  
20  
21  
22  
23  
24  
25  
26  
27  
28  
29  
30  
31  
32  
33  
34  
35  
36  
37  
38  
39  
40  
41  
42  
43  
44  
45  
46  
47  
48  
49  
50  
51  
52  
53  
54  
55  
56  
57  
58  
59  
60

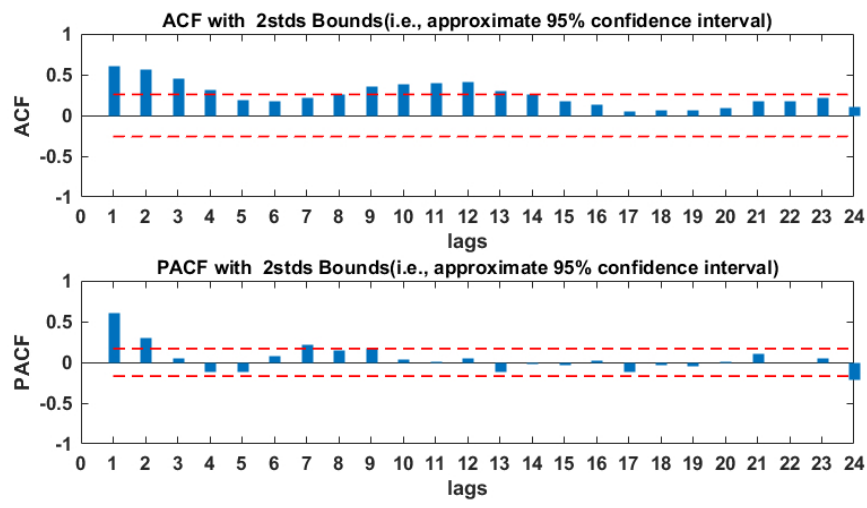

Figure 3. The ACF and PACF diagrams of modeling data

233x121mm (96 x 96 DPI)

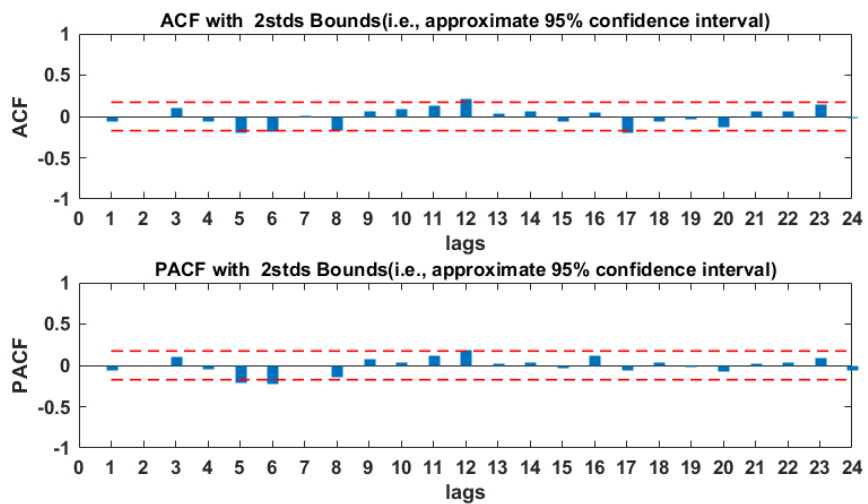

Figure 4. The ACF and PACF graphs of residual errors of AR ((1,2,8)) Model

233x122mm (96 x 96 DPI)



1  
2  
3  
4  
5  
6  
7  
8  
9  
10  
11  
12  
13  
14  
15  
16  
17  
18  
19  
20  
21  
22  
23  
24  
25  
26  
27  
28  
29  
30  
31  
32  
33  
34  
35  
36  
37  
38  
39  
40  
41  
42  
43  
44  
45  
46  
47  
48  
49  
50  
51  
52  
53  
54  
55  
56  
57  
58  
59  
60

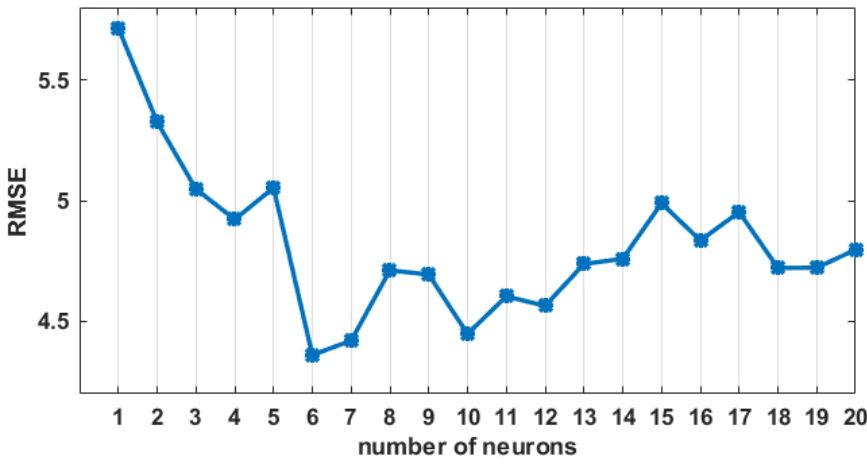

Figure 5. The numbers of neurons in AR-Elman Model and the corresponding RMSE Values

196x95mm (96 x 96 DPI)

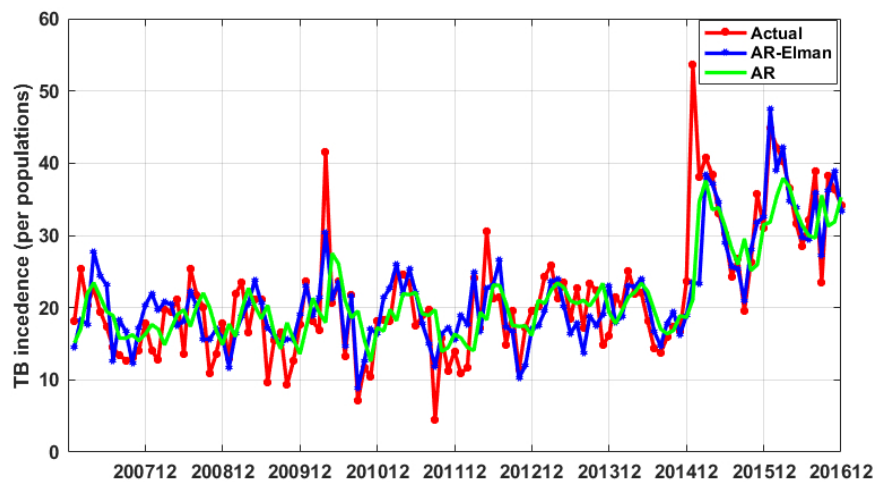

Figure 6. Fitting comparison Diagram of AR ((1,2,8)) Model and AR-Elman Model

233x123mm (96 x 96 DPI)

# BMJ Open

## Predictive study of tuberculosis incidence by time series method and Elman neural network in Kashgar, China

|                                 |                                                                                                                                                                                                                                                                                                                                                                                                                                                                                                                                                                                                                                                                                                                                                                                                           |
|---------------------------------|-----------------------------------------------------------------------------------------------------------------------------------------------------------------------------------------------------------------------------------------------------------------------------------------------------------------------------------------------------------------------------------------------------------------------------------------------------------------------------------------------------------------------------------------------------------------------------------------------------------------------------------------------------------------------------------------------------------------------------------------------------------------------------------------------------------|
| Journal:                        | <i>BMJ Open</i>                                                                                                                                                                                                                                                                                                                                                                                                                                                                                                                                                                                                                                                                                                                                                                                           |
| Manuscript ID                   | bmjopen-2020-041040.R1                                                                                                                                                                                                                                                                                                                                                                                                                                                                                                                                                                                                                                                                                                                                                                                    |
| Article Type:                   | Original research                                                                                                                                                                                                                                                                                                                                                                                                                                                                                                                                                                                                                                                                                                                                                                                         |
| Date Submitted by the Author:   | 06-Oct-2020                                                                                                                                                                                                                                                                                                                                                                                                                                                                                                                                                                                                                                                                                                                                                                                               |
| Complete List of Authors:       | Zheng, Yanling; Xinjiang Medical University, College of Medical Engineering and Technology<br>Zhang, Xueliang; Xinjiang Medical University, College of Medical Engineering and Technology, Xinjiang Medical University<br>Wang, Xijiang; Center for Disease Control and Prevention of Xinjiang Uygur Autonomous Region, Center for Disease Control and Prevention of Xinjiang Uygur Autonomous Region, Urumqi 830001, People's Republic of China<br>Wang, Kai; Xinjiang Medical University, College of Medical Engineering and Technology, Urumqi 830054, People's Republic of China<br>Cui, Yan; Center for Disease Control and Prevention of Xinjiang Uygur Autonomous Region, Center for Disease Control and Prevention of Xinjiang Uygur Autonomous Region, Urumqi 830001, People's Republic of China |
| <b>Primary Subject Heading</b>: | Health services research                                                                                                                                                                                                                                                                                                                                                                                                                                                                                                                                                                                                                                                                                                                                                                                  |
| Secondary Subject Heading:      | Health services research, Infectious diseases                                                                                                                                                                                                                                                                                                                                                                                                                                                                                                                                                                                                                                                                                                                                                             |
| Keywords:                       | International health services < HEALTH SERVICES ADMINISTRATION & MANAGEMENT, Tuberculosis < INFECTIOUS DISEASES, STATISTICS & RESEARCH METHODS                                                                                                                                                                                                                                                                                                                                                                                                                                                                                                                                                                                                                                                            |
|                                 |                                                                                                                                                                                                                                                                                                                                                                                                                                                                                                                                                                                                                                                                                                                                                                                                           |

SCHOLARONE™  
Manuscripts



I, the Submitting Author has the right to grant and does grant on behalf of all authors of the Work (as defined in the below author licence), an exclusive licence and/or a non-exclusive licence for contributions from authors who are: i) UK Crown employees; ii) where BMJ has agreed a CC-BY licence shall apply, and/or iii) in accordance with the terms applicable for US Federal Government officers or employees acting as part of their official duties; on a worldwide, perpetual, irrevocable, royalty-free basis to BMJ Publishing Group Ltd ("BMJ") its licensees and where the relevant Journal is co-owned by BMJ to the co-owners of the Journal, to publish the Work in this journal and any other BMJ products and to exploit all rights, as set out in our [licence](#).

The Submitting Author accepts and understands that any supply made under these terms is made by BMJ to the Submitting Author unless you are acting as an employee on behalf of your employer or a postgraduate student of an affiliated institution which is paying any applicable article publishing charge ("APC") for Open Access articles. Where the Submitting Author wishes to make the Work available on an Open Access basis (and intends to pay the relevant APC), the terms of reuse of such Open Access shall be governed by a Creative Commons licence – details of these licences and which [Creative Commons](#) licence will apply to this Work are set out in our licence referred to above.

Other than as permitted in any relevant BMJ Author's Self Archiving Policies, I confirm this Work has not been accepted for publication elsewhere, is not being considered for publication elsewhere and does not duplicate material already published. I confirm all authors consent to publication of this Work and authorise the granting of this licence.

1  
2  
3  
4 Predictive study of tuberculosis incidence by time series method  
5  
6  
7 and Elman neural network in Kashgar, China

8  
9 **Yanling Zheng<sup>1</sup>, XueLiang Zhang<sup>1\*</sup>, XiJiang Wang<sup>2</sup>, Kai Wang<sup>1</sup>, Yan Cui<sup>2\*</sup>**

10  
11 1. College of Medical Engineering and Technology, Xinjiang Medical University,  
12  
13 Urumqi 830054, People's Republic of China

14  
15 2. Center for Disease Control and Prevention of Xinjiang Uygur Autonomous Region,  
16  
17 Urumqi 830001, People's Republic of China

18  
19  
20  
21  
22  
23  
24  
25  
26  
27  
28  
29  
30  
31  
32  
33  
34  
35  
36  
37  
38  
39  
40  
41  
42  
43  
44  
45  
46  
47  
48  
49  
50  
51  
52  
53  
54  
55  
56  
57  
58  
59 

---

**Xueliang Zhang :<sup>\*</sup> Corresponding author, zhengyl\_math@sina.cn**  
60 **Yan Cui :<sup>\*</sup> Corresponding author, cuiyan\_jk@sina.com**

## 1 **Abstract:**

2 **Objective:** The incidence of tuberculosis (TB) in Kashgar, China, is very high, so the  
3 prevention and control of TB is arduous. However, there is little quantitative  
4 prediction study on the TB incidence in Kashgar, therefore, it is urgent to do  
5 prediction analysis of TB incidence in Kashgar, which can provide scientific reference  
6 for the prevention and control of TB.

7 **Methods:** Based on the monthly TB incidence in Kashgar, a single Box-Jenkins  
8 method and a Box-Jenkins and Elman neural network (ElmanNN) hybrid method  
9 were used to do prediction analysis of TB incidence in Kashgar. Root mean square  
10 error (RMSE), mean absolute error (MAE) and mean absolute percentage error  
11 (MAPE) were used to measure the prediction accuracy.

12 **Results:** After careful analysis, the single AR((1,2,8)) model and  
13 AR((1,2,8))-ElmanNN (AR-Elman) hybrid model were established, and the optimal  
14 neurons value of the AR-Elman hybrid model was 6. For the fitting dataset, the  
15 RMSE, MAE and MAPE were 6.15, 4.33 and 0.2858, respectively, for the AR((1,2,8))  
16 model, and 3.78, 3.38 and 0.1837, respectively, for the AR-Elman hybrid model. For  
17 the forecasting dataset, the RMSE, MAE and MAPE were 10.88, 8.75 and 0.2029,  
18 respectively, for the AR((1,2,8)) model, and 8.86, 7.29 and 0.2006, respectively, for  
19 the AR-Elman hybrid model.

20 **Conclusions:** Both the single AR((1,2,8)) model and AR-Elman model could be used  
21 to predict the TB incidence in Kashgar, but the modeling and validation  
22 scale-dependent measures (RMSE, MAE and MAPE) in the AR((1,2,8)) model were  
23 inferior to those in the AR-Elman hybrid model, which indicated that AR-Elman  
24 hybrid model was better than AR((1,2,8)) model. The AR-Elman hybrid model can be  
25 highlighted in predicting the temporal trends of TB incidence in Kashgar, which may  
26 act as the potential for far-reaching implications for prevention and control of TB.

27 **Keywords:** Tuberculosis; Prediction; Box-Jenkins method; Elman neural network

## 28 29 **Strengths and limitations of this study:**

- 1  
2  
3  
4 30 1. The incidence of tuberculosis (TB) is very high in Kashgar, therefore, it is urgent to  
5  
6 31 do the prediction analysis of TB in Kashgar.
- 7 32 2. In the study, AR-Elman model with high prediction accuracy was established, it  
8  
9 33 can be used to predict the development of TB in Kashgar, China.
- 10 34 3. This study did not consider possible influencing factors related to TB, such as  
11  
12 35 climatic factors, environmental factors, demographic factors and political  
13  
14 36 issues,etc.

## 15 37 **Introduction**

18 38 Tuberculosis (TB) is still a major global public health problem and the ninth  
19  
20 39 leading cause of death in the world.<sup>1-3</sup> Because TB is contagious, patient resistance is  
21  
22 40 low, treatment time is long, patients' labor force is lost and their contribution to  
23  
24 41 society is reduced, so TB brings great burden to society and economy. All countries in  
25  
26 42 the world are working hard to fight tuberculosis. In 2018, the number of new reported  
27  
28 43 TB cases was about 10 million; this figure has remained relatively stable in recent  
29  
30 44 years. The latest treatment results showed that the global TB treatment success rate  
31  
32 45 was 83%. World Health Organization (WHO) has set targets for the stop TB strategy.  
33  
34 46 The targets mentioned that by 2030, on the basis of the work in 2015, TB deaths will  
35  
36 47 reduce by 90%, and annual new TB cases will reduce by 80%.<sup>4</sup> In order to achieve  
37  
38 48 these goals, TB prevention and control services must be provided in the broad context  
39  
40 49 of universal health coverage, joint action must be taken to address the social and  
41  
42 50 economic consequences of TB, and technological breakthroughs should be achieved  
43  
44 51 by 2025 to make the TB incidence decline faster than that at any time in history.  
45  
46 52 According to the global tuberculosis report 2019<sup>4</sup>, China has the second highest  
47  
48 53 number of TB cases in the world.<sup>4</sup> The TB incidence in western China was much  
49  
50 54 higher than that in eastern and central China. The province with the highest TB  
51  
52 55 incidence in the west is Xinjiang province. From 2016 to 2017, the annual TB  
53  
54 56 incidence in Xinjiang was 185.66/100,000 and 202.58/100,000, while the annual TB  
55  
56 57 incidence from 2016 to 2017 in China was 61/100,000 and 60.53/100,000,  
57  
58 58 respectively, it is nearly three times higher in Xinjiang than that national level.

59 59 There are 14 Prefectural-Level cities in Xinjiang, China, among which Kashgar  
60

1  
2  
3  
4 60 has a very high TB incidence rate. From 2016 to 2017, the annual TB incidences in  
5  
6 61 Kashgar were 427.44/100,000 and 465.33/100,000, respectively, which were nearly 7  
7  
8 62 times higher than that of the national level. Doing a good job in the prevention and  
9  
10 63 control of TB in Kashgar is an important link to reduce the TB incidence in Xinjiang.

11 64 Mastering the changing law of the incidence of infectious diseases, using the  
12  
13 65 existing surveillance data to analyze, then, to predict the possible epidemic trend and  
14  
15 66 provide reference data for the prevention, can better control the occurrence and  
16  
17 67 epidemic of infectious diseases. Prediction of infectious diseases is to predict the  
18  
19 68 occurrence, development and epidemic trend of infectious diseases according to the  
20  
21 69 occurrence, development law and related factors of infectious diseases, based on  
22  
23 70 analysis, judgment and mathematical model, etc.

24  
25 71 For study of quantitative prediction of infectious diseases, there are many  
26  
27 72 methods, such as grey prediction method <sup>5</sup>, exponential smoothing prediction method  
28  
29 73 <sup>6,7</sup>, dynamic model prediction method <sup>8</sup>, Box-Jenkins method <sup>9</sup>, neural network  
30  
31 74 method <sup>10</sup>, etc., with the deepening of prediction research, more and more scholars  
32  
33 75 like to use the Box-Jenkins method <sup>11-21</sup>, there are many different models in this  
34  
35 76 method, and if appropriate models are established according to the characteristics of  
36  
37 77 time series, high prediction ability often can be obtained. Neural network has strong  
38  
39 78 nonlinear mapping ability, in which Elman neural network is composed of input layer,  
40  
41 79 hidden layer, connection layer and output layer. The Elman network has dynamic  
42  
43 80 memory function, and it is very suitable for time series prediction. At present, the  
44  
45 81 Elman network is widely used in various fields, and has achieved successful  
46  
47 82 prediction results. <sup>22-26</sup> Sometimes, the prediction effect of a single model is not ideal,  
48  
49 83 in order to further improve the prediction accuracy, many studies adopt the combined  
50  
51 84 model prediction method <sup>27-29</sup>, the combined model can absorb the advantages of two  
52  
53 85 or more methods so as to achieve a higher prediction accuracy.

54 86 The TB incidence of Kashgar is very high, and it is urgent to do a good job in the  
55  
56 87 prevention and control of TB in this area. Accurate prediction of TB incidence is a  
57  
58 88 prerequisite for prevention and control, which can help advance resource planning and  
59  
60 89 policy formulation. In this study, the popular Box-Jenkins time series method was



1  
2  
3  
4 90 used to build model for predicting the TB incidence in Kashgar, in order to improve  
5  
6 91 the prediction accuracy, the Elman neural network with strong nonlinear information  
7  
8 92 capture ability was used to construct the combined model for prediction analysis.

## 93 **Materials and Methods**

### 94 **Study area and data Sources**

95 We selected Kashgar as the study site (see Figure 1). This area is located in the  
96 south of Xinjiang province in China with an area of approximately 16.2 thousand  
97 square kilometers and a permanent population of 4.64 million in 2018. TB case data  
98 from January 2005 to December 2017 were obtained from the Center for Disease  
99 Control and Prevention of Xinjiang Uygur Autonomous Region. Population data were  
100 obtained from Xinjiang Bureau of Statistics. Based on the population data and TB  
101 case data, we calculated the incidence data of TB.

### 102 **Patient and public involvement**

103 Patients were not involved in the design of this study as it involved only  
104 observational analysis of an anonymised, pre-existing, routinely collected dataset.

### 105 **Autoregressive moving average (ARMA) model**

106 ARMA model<sup>30</sup> is an important time series analysis and prediction model in  
107 Box-Jenkins method, also known as auto-regression moving average model. The  
108 ARMA (p,q) model is a model with autocorrelation order p and moving average order  
109 q, p and q are judged by autocorrelation function (ACF) and partial autocorrelation  
110 function (PACF) diagram of stationary data. If the original data is stable, the  
111 autocorrelation coefficients are trailing, and the partial correlation coefficients are the  
112 p-order truncated, then q=0, the ARMA(p,q) model is recorded as AR(p), and its  
113 expression is as follows:

$$114 \quad X_t = c + \phi_1 X_{t-1} + \phi_2 X_{t-2} + \dots + \phi_p X_{t-p} + \varepsilon_t,$$

115 where,  $X_t$  is the observed value at t,  $\phi_1, \dots, \phi_p$  are model parameters, c is a constant, if  
116 only  $\phi_1, \phi_2, \phi_p$  are not zeros, then, The AR(p) model becomes a sparse model, which  
117 can be recorded as AR((1,2,p)).

1  
2  
3  
4 118 If the original data is stable, the autocorrelation coefficients are q-order truncated  
5  
6 119 and the partial correlation coefficients are trailing, then  $p=0$  and the ARMA(p,q)  
7  
8 120 model becomes MA(q), its expression is as follows:

9  
10 121 
$$X_t = \mu + \varepsilon_t + \theta_1 \varepsilon_{t-1} + \theta_2 \varepsilon_{t-2} + \dots + \theta_q \varepsilon_{t-q},$$

11  
12 122 where,  $\mu$  is the expected value of  $X_t$ .  $\theta_1, \dots, \theta_p$  are model parameters.

13  
14 123 If the original data is stable, the autocorrelation coefficients are trailing, and the  
15  
16 124 partial correlation coefficients are also trailing, then the expression of the ARMA (p, q)  
17  
18 125 model is as follows:

19  
20 126 
$$X_t = c + \phi_1 X_{t-1} + \phi_2 X_{t-2} + \dots + \phi_p X_{t-p} + \varepsilon_t - \theta_1 \varepsilon_{t-1} - \theta_2 \varepsilon_{t-2} - \dots - \theta_q \varepsilon_{t-q}.$$

21  
22 127 There are four main steps in ARMA modeling:

23  
24 128 First step. The prerequisite for ARMA modeling is the stationary of time series.  
25  
26 129 Check whether the data is stable by Augmented Dickey-Fuller (ADF) unit root test. In  
27  
28 130 this study, the significant level probability (p-value) is 0.05, and if the p-value is less  
29  
30 131 than 0.05, then, the data is stable. By observing the autocorrelation function (ACF)  
31  
32 132 and partial autocorrelation function (PACF) of the stable data, we can determine the  
33  
34 133 possible values of p and q and establish the possible ARMA (p, q) model.

35  
36 134 Second step. The parameters of ARMA(p, q) model are estimated by maximum  
37  
38 135 likelihood estimation or least square estimation, and the model parameters are tested.  
39  
40 136 If p-value is less than 0.05, the parameters have statistical significance. The best  
41  
42 137 model is determined according to the value of Akaike information criterion (AIC),  
43  
44 138 Schwarz criterion (SC) and Goodness of Fit ( $R^2$ ) of model. The smaller AIC and SC  
45  
46 139 are, the larger the  $R^2$  is, and the better the model is.

47  
48 140 Third step. To determine whether the established ARMA (p, q) model is suitable.  
49  
50 141 The residual sequence of a suitable model shall be the white noise process, and its  
51  
52 142 ACF and PACF coefficients should be within twice the standard deviation range,  
53  
54 143 otherwise, it is considered that the extraction information of the established model is  
55  
56 144 not sufficient, and it is necessary to consider improving the accuracy of the model.

57  
58 145 Fourth step. Using the established model to do prediction and analysis.

59  
60 146 **Elman neural network model**

1  
2  
3  
4 147 The Elman neural network is proposed by Elman in 1990<sup>31</sup>. The model is  
5  
6 148 generally divided into four layers: input layer, hidden layer, receiving layer and output  
7  
8 149 layer. The characteristic of Elman network is that the output of the hidden layer is  
9  
10 150 connected to the input of the hidden layer through the delay and storage of the  
11  
12 151 receiving layer, which makes it sensitive to the data of the historical state. The  
13  
14 152 addition of the internal feedback network increases the ability of the network itself to  
15  
16 153 deal with dynamic information, thus achieving the purpose of dynamic modeling.

17 154 The mathematical structure of the Elman neural network is as follows:

18  
19 155 
$$x(k)=f(w^1x_c(k)+ w^2u(k-1))$$

20  
21 156 
$$x_c(k)= \alpha x_c(k-1)+ x(k-1)$$

22  
23 157 
$$y(k)=g(w^3x(k))$$

24  
25 158 Where,  $w^1$  is the connection weight matrix between the contact unit and the  
26  
27 159 hidden layer unit,  $w^2$  is the connection weight matrix between the input unit and the  
28  
29 160 hidden layer unit,  $w^3$  is the connection weight matrix between the hidden layer unit  
30  
31 161 and the output unit.  $x_c(k)$  and  $x(k)$  represent the output of the contact unit and the  
32  
33 162 hidden layer unit, respectively,  $y(k)$  represents the output of the output unit,  $\alpha$  is a  
34  
35 163 self-connected feedback gain factor,  $0 \leq \alpha < 1$ ,  $f(x)$  often takes the sigmoid function

36 164 There are four main steps in Elman neural network modeling:

37 165 First step. Data standardization processing. Data standardization is scaling the  
38  
39 166 data to a small specific interval. In order to remove the unit limit of the data and  
40  
41 167 convert it into dimensionless pure value, it is convenient for the index of different  
42  
43 168 units or order of magnitude to be compared and weighted. In our study, we use  
44  
45 169 function package `mapminmax()` to standardize the data, standardized data is in [-1,1]  
46  
47 170 range.

48  
49 171 Second step. Determine the input layer, the output layer. Generally, the input and  
50  
51 172 output layer are determined according to the characteristics of the data and the needs  
52  
53 173 of the analysis.

54  
55 174 Third step. Set the parameters of the Elman model, such as training epochs and  
56  
57 175 goals, etc., in our study, training epochs and goals of Elman neural network were set  
58  
59 176 to 2000 and 0.00001, respectively. To determine the number of neurons in the hidden  
60  
177 layer, so that the error of the established Elman model is minimized. At present, there  
178 is no ideal analytical expression for the number of neurons in the hidden layer. The  
179 number of neurons has a great influence on the performance of the network. When the

180 number of neurons is too large, it will lead to that the network learning time is too  
 181 long, the generalization performances are not good, and even the convergence failure,  
 182 but when the number of neurons is too small, the fault-tolerant ability of the network  
 183 is poor. In general, the number of neurons does not exceed 20.<sup>32</sup> In this study, matlab  
 184 cyclic structure was used to find the optimal number of neurons by comparing the  
 185 RMSE values of Elman networks with neurons 1 to 20.

186 Fourth step. According to the optimal number of neurons in the hidden layer, the  
 187 Elman model is constructed, and then the prediction and analysis can be made.

### 188 **Model comparison measures**

189 Three performance indexes, root mean square error (RMSE), mean absolute error  
 190 (MAE) and mean absolute percentage error (MAPE) were used to assess the fitting  
 191 and forecasting accuracy of two models. The smaller these three values are, the better  
 192 the model is. Their expressions are as follows<sup>10</sup>:

$$193 \quad RMSE = \sqrt{\frac{\sum_{t=1}^n (X_t - \hat{X}_t)^2}{n}}$$

$$194 \quad MAE = \frac{\sum_{t=1}^n |X_t - \hat{X}_t|}{n},$$

$$195 \quad MAPE = \frac{\sum_{t=1}^n \left| \frac{X_t - \hat{X}_t}{X_t} \right| \times 100}{n},$$

196 where  $\hat{X}_t$  is the simulating and forecasting values,  $X_t$  is the actual values and  $n$   
 197 is the number of observations.

### 198 **Statistical software**

199 All data analyses were conducted using Eviews7, matlab2015b, Arcmap10.1.

## 200 **Results**

201 From January 2005 to December 2017, the number of reported TB cases was  
 202 141984 in Kashgar, Xinjiang, the average annual TB cases were 7888 and the average  
 203 annual incidence was 191.18. Figure 2 showed the time series graph of the TB  
 204 incidence. It can be seen from the Figure 2 that the curve of TB incidence showed  
 205 strong nonlinear characteristics from 2005 to 2014, and the TB incidence from 2015  
 206 to 2017 were significantly higher than that of previous years.

207 The data of TB incidence from January 2005 to December 2017 were divided

208 into two parts. The data from January 2005 to December 2016 were used to build  
209 model and the data from January 2017 to December 2017 were used to test the model.

## 210 **Establishment of ARMA Model**

211 ARMA Modeling requires data stability, so, first of all, the stability of the  
212 modeling part of the data was verified by ADF test. The results of ADF test showed  
213 that p-value was less than 0.05(see Table 1), which indicated that the data was stable  
214 and could be directly used to build the model. Secondly, the ACF and PACF graphs  
215 of the modeling data were plotted (see Figure 3), it was obvious from Figure 3 that the  
216 autocorrelation coefficients were trailing distribution, and the partial correlation  
217 coefficients were almost a second-order truncated distribution, only at the lag 7, 8 and  
218 9, the correlation coefficients were a little large. Based on this situation, we  
219 considered establishing four models, such as AR(2), AR((1,2,7)), AR((1,2,8)) and  
220 AR((1,2,9)). The least square method was used to test the parameters of the four  
221 models. The results of the test were shown in Table 2; we can see that, of the four  
222 models, only AR (2) model and AR((1,2,8)) passed the parameter test. Comparing the  
223 two models, it was found that, the AR((1,2,8)) model had smaller AIC and SC values,  
224 and the  $R^2$  values of AR((1,2,8)) were larger than the  $R^2$  values of AR (2), so the AR  
225 (2) model was abandoned. Then, the residual analysis of the AR((1,2,8)) model was  
226 carried out, the autocorrelation and partial correlation coefficient of the residuals were  
227 almost all within two times standard deviation, and only in the lag 5,6,12, they were  
228 beyond the range of two times standard deviation (see Figure 4), which indicated that  
229 the AR((1,2,8)) model could be used to roughly predict the TB incidence in Kashgar.  
230 We used AR((1,2,8)) model to fit the TB incidence from September 2005 to  
231 December 2016, the fitting RMSE ,MAE and MAPE were 6.15, 4.33 and 0.2858,  
232 respectively; we used AR((1,2,8)) model to predict the TB incidence from January  
233 2017 to December 2017, the prediction RMSE, MAE and MAPE were 10.88 , 8.75  
234 and 0.2029, respectively.

## 235 **Establishment of AR-Elman Model**

236 In order to improve the prediction accuracy of the AR((1,2,8)) model, we tried

237 to establish the AR((1,2,8))-Elman hybrid model. The fitting sequence of AR((1,2,8))  
 238 model was used as input variable, and the actual TB incidence was used as output  
 239 variable. Due to the a little similarity of the annual trend of TB incidence in Kashgar  
 240 (see Figure 2), therefore, we created twelve time-lagged variables as input features.  
 241 Supposing that  $x_t$  represented the TB incidence at time t, and then the input matrix and  
 242 the output matrix of modeling data set used in this study were designed as follows  
 243 ( $N=12$ ):

$$244 \quad \text{input matrix} = \begin{bmatrix} x_1 & x_2 & \dots & x_i \\ x_2 & x_3 & \dots & x_{i+1} \\ \dots & \dots & \dots & \dots \\ x_N & x_{N+1} & \dots & \dots \end{bmatrix}, \text{output matrix} = [x_{N+1} \quad x_{N+2} \quad \dots \quad x_{N+i}]$$

245 We selected twelve as the number of input layers of AR-Elman network and  
 246 one as the number of output layers representing the forecast value. By the matlab  
 247 cyclic structure, we selected the optimal number of neurons between 1 and 20, and  
 248 finally we found when the number of neurons was 6 (see Figure 5), the RMSE was the  
 249 smallest, and the AR-Elman was optimal. We used the AR-Elman model to fit the  
 250 training data, RMSE was 3.78, MAE was 3.38, MAPE was 0.1837, and the  $R^2$  of the  
 251 model was 0.83; we used the AR-Elman model to predict the TB incidence from  
 252 January 2017 to December 2017, RMSE was 8.86, MAE was 7.29, and MAPE was  
 253 0.2006. The fitting graph of AR((1,2,8)) model and AR-Elman model was shown in  
 254 Figure 6. Comparison results of the AR((1,2,8)) model and AR-Elman model was  
 255 shown in Table 3, both the fitting RMSE, MAE and MAPE and the predicting RMSE,  
 256 MAE and MAPE of the AR-Elman model were smaller than those of the single  
 257 AR((1,2,8)) model, which indicated that the AR-Elman combined model established  
 258 in this study was more suitable for predicting the TB incidence in Kashgar.

## 259 Discussion

260 According to the WHO 2019 Global Tuberculosis report <sup>4</sup>, around the world, TB  
 261 mortality was down about 3% every year, the incidence was down about 2% every  
 262 year, 16% of TB patients died of the disease. <sup>4</sup> But the rate of decline has not reached  
 263 the pace of the stop Tuberculosis Strategy Plan. Therefore, it is necessary to  
 264 strengthen the prevention and control of tuberculosis. In order to significantly narrow  
 265 these gaps, greater progress must be made in a group of countries with a high burden  
 266 of tuberculosis. The burden of TB in China ranks second in the world, and Xinjiang is  
 267 the province with the highest incidence of TB in China, and Kashgar is the area with

1  
2  
3  
4 268 the high TB incidence in Xinjiang. Therefore, it is urgent to do a good job in the  
5  
6 269 prevention and control of TB in Kashgar.

7  
8 270 The prediction and early warning of infectious diseases is an important link in  
9  
10 271 the prevention and control of infectious diseases.<sup>32-34</sup> Therefore, this study carried out  
11  
12 272 research from the point of view of prediction to explore an accurate prediction model  
13  
14 273 and do prediction analysis of TB incidence in Kashgar, so as to provide scientific  
15  
16 274 reference for the prevention and control of the disease in this area. The Box -Jenkins  
17  
18 275 method is a popular time series prediction method, this method has good prediction  
19  
20 276 performance and high prediction accuracy; Elman Neural network can capture  
21  
22 277 nonlinear information of time series data very well. In this study, the two methods  
23  
24 278 were combined to study the prediction model of TB incidence in Kashgar.

25  
26 279 Many studies have found that Box-Jenkins method has a good ability of fitting  
27  
28 280 and forecasting. For stationary time series that do not contain seasonality, it is more  
29  
30 281 suitable to use the ARMA model of the Box-Jenkins method to do prediction analysis  
31  
32 282 <sup>35</sup>, for non-stationary time series of infectious diseases with obvious seasonality, it is  
33  
34 283 more suitable to use seasonal autoregressive integrated moving average (SARIMA)  
35  
36 284 model of the Box-Jenkins method for prediction analysis.<sup>9-12</sup> In our study, from Figure  
37  
38 285 2, we could see that the seasonality of the TB incidence in Kashgar from 2005 to 2014  
39  
40 286 was not obvious, there was only a certain seasonality from 2015 to 2017, and we  
41  
42 287 found that the time series of TB incidence was stable by ADF unit root test, and the  
43  
44 288 autocorrelation and partial correlation coefficients of modeling data at lag 12, 24 were  
45  
46 289 not obviously large, therefore, for our research data, we used ARMA model to do  
47  
48 290 forecast analysis, finally, we established AR((1,2,8)) model of the Box-Jenkins  
49  
50 291 method, it has a good performance to fit and predict the TB incidence of Kashgar in  
51  
52 292 Xinjiang. From Figure 2, we can also see that the time series of TB incidence has  
53  
54 293 strong non-linear, the established AR((1,2,8)) model mainly extracted the linear  
55  
56 294 information of data, considering that the neural network can capture the non-linear  
57  
58 295 information of data well, in order to improve the prediction accuracy of TB incidence  
59  
60 296 rate in Kashgar, we used AR((1,2,8)) model and Elman neural network model to  
297 establish AR-Elman hybrid model. Many studies have found that the combination  
298 model can improve the accuracy of prediction, such as, Wang et al.<sup>28</sup> found that  
299 SARIMA-NAR hybrid model has an outstanding ability to improve the prediction  
300 accuracy relative to SARIMA model and nonlinear autoregressive network (NAR)

1  
2  
3  
4 301 model when they were used to predict pertussis incidence in China. Li et al.<sup>27</sup> found  
5 302 ARIMA-GRNN hybrid model was shown to be superior to the single ARIMA model  
6  
7 303 in predicting the short-term TB incidence in the Chinese population. Our research was  
8  
9 304 consistent with these literatures that our AR-Elman hybrid model was more accurate  
10 305 than the single AR((1,2,8)) model.

11  
12 306 The incidence of tuberculosis in Kashgar, Xinjiang is very high, and the relevant  
13 307 departments of disease prevention and control in Xinjiang have also done a lot of  
14 308 effective work. Our research was mainly to build a high-precision prediction model to  
15 309 help early warning of tuberculosis in Kashgar. Finally, we established the AR-Elman  
16 310 hybrid model, which had high fitting and prediction accuracy of TB incidence in  
17 311 Kashgar, Xinjiang. Because the development of any event may be affected by many  
18 312 factors, such as social, economic, political, demographic factors, so the long-term  
19 313 forecast accuracy of the AR-Elman hybrid model may decline.

## 24 314 **Conclusions**

25  
26  
27 315 Kashgar has a very high TB incidence, in order to provide some help for the  
28 316 prevention and control of this disease in this area, the prediction problem of the TB  
29 317 incidence was studied. Firstly, a single AR((1,2,8)) prediction model was established  
30 318 by using Box-Jenkins method, and its fitting and prediction performance were good,  
31 319 secondly, in order to improve the prediction accuracy of the single AR((1,2,8)) model,  
32 320 we used single AR((1,2,8)) and Elman neural network with strong ability to capture  
33 321 nonlinear information to establish AR-Elman hybrid model. The fitting and prediction  
34 322 accuracy of the hybrid model was higher than that of the single AR((1,2,8)) model.  
35 323 The AR-Elman hybrid model can provide scientific help for predicting and warning  
36 324 the TB incidence in Kashgar, Xinjiang. This study also has some limitations, we did  
37 325 not consider possible influencing factors related to TB, such as climatic factors and  
38 326 political issues, etc, in further studies, we will consider these factors.

## 37 327 **Competing interests**

38 328 The authors declare no conflict of interest.

## 39 329 **Funding**

40 330 This work was supported by Major projects of science and technology in  
41 331 Xinjiang Autonomous region (Grant No.2017A03006), China, and National Natural  
42 332 Science Foundation of China Regional Science Foundation Project (Grant No.  
43 333 72064036, 82060609),and State Key Laboratory of Pathogenesis, Prevention and  
44 334 Treatment of High Incidence Diseases in Central Asia Fund (Grant No.



1  
2  
3  
4 335 SKL-HIDCA-2020-9)

5 336 **Data sharing statement**

6  
7 337 No additional data are available.

8 338 **Author contributions**

9  
10 339 YLZ analyzed the data and wrote the manuscript. XLZ, XJW, KW and YC wrote  
11 and revised the manuscript. All authors read and approved the final manuscript.

12 340  
13 341 **Acknowledgements**

14  
15 342 We would like to express our gratitude to anonymous peer reviewers for  
16 343 carefully revising our manuscript and for his or her useful comments.

17  
18 344 **References**

19  
20 345 1. Kemal J, Sibhat B, Abraham A, et al. Bovine tuberculosis in eastern Ethiopia:  
21 prevalence, risk factors and its public health importance. BMC Infectious Diseases,  
22 346 2019; 19(1).  
23 347

24  
25 348 2. Tilahun M, Ameni G, Desta K, et al. Molecular epidemiology and drug sensitivity  
26 pattern of Mycobacterium tuberculosis strains isolated from pulmonary  
27 349 tuberculosis patients in and around Ambo Town, Central Ethiopia. Plos One, 2018;  
28 350 13(2):e0193083-.  
29 351

30  
31 352 3. Reta A, Simachew A. The Role of Private Health Sector for Tuberculosis Control  
32 in Debre Markos Town, Northwest Ethiopia. Advances in Medicine,  
33 353 2018;2018(2):1-8.  
34 354

35 355 4. WHO. Global tuberculosis report 2019, [https://www.who.int/tb/publications/  
36 global\\_report/en/](https://www.who.int/tb/publications/global_report/en/). (Accessed on 17 Oct 2019).  
37 356

38  
39 357 5. Zhao YF, Shou MH, Wang ZX. Prediction of the Number of Patients Infected with  
40 COVID-19 Based on Rolling Grey Verhulst Models. Int J Environ Res Public  
41 358 Health. 2020; 17(12):4582.  
42 359

43  
44 360 6. Guan P, Wu W, Huang D. Trends of reported human brucellosis cases in mainland  
45 China from 2007 to 2017: an exponential smoothing time series analysis. Environ  
46 361 Health Prev Med. 2018; 23(1):23.  
47 362

48  
49 363 7. Zhang YQ, Li XX, Li WB, Jiang JG, Zhang GL, Zhuang Y, Xu JY, Shi J, Sun DY.  
50 Analysis and predication of tuberculosis registration rates in Henan Province,  
51 364 China: an exponential smoothing model study. Infect Dis Poverty. 2020;9(1):123.  
52 365

- 1  
2  
3  
4 366 8. Martínez-Bello DA, López-Quílez A, Torres-Prieto A. Bayesian dynamic modeling  
5 367 of time series of dengue disease case counts. *PLoS Negl Trop Dis*.  
6 368 2017;11(7):e0005696.
- 9 369 9. Wang Y, Xu C, Zhang S, Wang Z, Zhu Y, Yuan J. Temporal trends analysis of  
11 370 human brucellosis incidence in mainland China from 2004 to 2018. *Sci Rep*.  
13 371 2018;8(1):15901.
- 15 372 10. Wang Y, Xu C, Li Y, Wu W, Gui L, Ren J, Yao S. An Advanced Data-Driven  
17 373 Hybrid Model of SARIMA-NNNAR for Tuberculosis Incidence Time Series  
19 374 Forecasting in Qinghai Province, China. *Infect Drug Resist*. 2020;13:867-880.
- 21 375 11. Aryee, Kwarteng , Essuman, Nkansa Agyei, et al. Estimating the incidence of  
23 376 tuberculosis cases reported at a tertiary hospital in Ghana: a time series model  
25 377 approach. *BMC Public Health*.2018;18(1):1292.
- 27 378 12. Tohidinik H R , Moheballi M , Mansournia M A, et al. Forecasting zoonotic  
29 379 cutaneous leishmaniasis using meteorological factors in eastern Fars province, Iran:  
31 380 A SARIMA Analysis. *Tropical Medicine & International Health*,  
33 381 2018;23(8):860–869.
- 35 382 13. Ouedraogo B, Inoue Y, Kambiré A, et al. Spatio-temporal dynamic of malaria in  
37 383 Ouagadougou, Burkina Faso, 2011–2015. *Malaria Journal*, 2018;17(1):138.
- 39 384 14. Wagenaar B H, Augusto O, Beste J, et al. The 2014–2015 Ebola virus disease  
41 385 outbreak and primary healthcare delivery in Liberia: Time-series analyses for  
43 386 2010–2016. *Plos Medicine*, 2018; 15(2):e1002508.
- 45 387 15. Liu S, Chen J, Wang J, et al. Predicting the outbreak of hand, foot, and mouth  
47 388 disease in Nanjing, China: a time-series model based on weather variability.  
49 389 *International Journal of Biometeorology*, 2017;(6):1-10.
- 51 390 16. Anokye R, Acheampong E, Owusu I, et al. Time series analysis of malaria in  
53 391 Kumasi: Using ARIMA models to forecast future incidence. *Cogent Social*  
55 392 *Sciences*, 2018; 4(1):1461544.
- 57 393 17. Wang Y W , Shen Z Z , Jiang Y . Comparison of autoregressive integrated moving  
59 394 average model and generalised regression neural network model for prediction of  
61 395 haemorrhagic fever with renal syndrome in China: a time-series study. *BMJ Open*,

- 1  
2  
3  
4 396 2019; 9(6):e025773.
- 5  
6 397 18.Guo W L , Geng J , Zhan Y , et al. Forecasting and predicting intussusception in  
7  
8 398 children younger than 48 months in Suzhou using a seasonal autoregressive  
9  
10 399 integrated moving average model. *BMJ Open*, 2019; 9(1).
- 11  
12 400 19.Gabriel A F B , Alencar A P , Miraglia S G E K . Dengue outbreaks: unpredictable  
13  
14 401 incidence time series. *Epidemiology & Infection*, 2019; 147.
- 15  
16 402 20.Tian C W , Wang H , Luo X M . Time-series modelling and forecasting of hand,  
17  
18 403 foot and mouth disease cases in China from 2008 to 2018. *Epidemiology &*  
19  
20 404 *Infection*, 2019; 147.
- 21  
22 405 21.Juang W C , Huang S J , Huang F D , et al. Application of time series analysis in  
23  
24 406 modelling and forecasting emergency department visits in a medical centre in  
25  
26 407 Southern Taiwan. *Bmj Open*, 2017; 7(11):e018628.
- 27  
28 408 22. Yu C, Li Y, Zhang M. An improved Wavelet Transform using Singular Spectrum  
29  
30 409 Analysis for wind speed forecasting based on Elman Neural Network. *Energy*  
31  
32 410 *Conversion & Management*, 2017; 148:895-904.
- 33  
34 411 23.Huang Y, Shen L. Elman Neural Network Optimized by Firefly Algorithm for  
35  
36 412 Forecasting China's Carbon Dioxide Emissions. *Communications in Computer*  
37  
38 413 *and Information Science*, 2018;(951): 36-47.
- 39  
40 414 24. Alkhasawneh M S. Hybrid Cascade Forward Neural Network with Elman Neural  
41  
42 415 Network for Disease Prediction. *Arabian Journal for Science and Engineering*,  
43  
44 416 2019;44(11): 9209–9220.
- 45  
46 417 25. Mehrgini B, Izadi H, Memarian H. Shear wave velocity prediction using Elman  
47  
48 418 artificial neural network. *Carbonates & Evaporites*, 2017;(6):1-11.
- 49  
50 419 26. Khalaf M, Hussain A J, Keight R, et al. Machine learning approaches to the  
51  
52 420 application of disease modifying therapy for sickle cell using classification  
53  
54 421 models. *Neurocomputing*, 2017; 228(C):154-164.
- 55  
56 422 27. Li Z, Wang Z, Song H, Liu Q, He B, Shi P, Ji Y, Xu D, Wang J. Application of a  
57  
58 423 hybrid model in predicting the incidence of tuberculosis in a Chinese population.  
59  
60 424 *Infect Drug Resist.* 2019;12:1011-1020.
- 425 28. Wang Y, Xu C, Wang Z, Zhang S, Zhu Y, Yuan J. Time series modeling of

- 1  
2  
3  
4 426 pertussis incidence in China from 2004 to 2018 with a novel wavelet based  
5  
6 427 SARIMA-NAR hybrid model. PLoS One. 2018;13(12):e0208404.  
7  
8 428 29. Wang Y, Xu C, Zhang S, Wang Z, Yang L, Zhu Y, Yuan J. Temporal trends  
9  
10 429 analysis of tuberculosis morbidity in mainland China from 1997 to 2025 using a  
11  
12 430 new SARIMA-NARNNX hybrid model. BMJ Open. 2019;9(7):e024409.  
13  
14 431 30. Box G E, Jenkins G M. Time series analysis: forecasting and control rev. ed.  
15  
16 432 Oakland, California, Holden-Day, 1976; 31(4):238-242.  
17  
18 433 31. Ming Cheng. The principle and example of MATLAB neural network. Tsinghua  
19  
20 434 University Press, 2013.  
21  
22 435 32. Huppert A, Katriel G. Mathematical modelling and prediction in infectious  
23  
24 436 disease epidemiology. Clin Microbiol Infect. 2013;19(11):999-1005  
25  
26 437 33. Wearing HJ1, Rohani P, Keeling MJ. Appropriate models for the management of  
27  
28 438 infectious diseases. PLoS Med. 2005; 2(7):e174.  
29  
30 439 34. Neuberger A, Paul M, Nizar A, Raoult D. Modelling in infectious diseases:  
31  
32 440 between haphazard and hazard. Clin Microbiol Infect. 2013;19(11):993-8.  
33  
34 441 35. Tipirneni-Sajja A, Krafft AJ, Loeffler RB, Song R, Bahrami A, Hankins JS,  
35  
36 442 Hillenbrand CM. Autoregressive moving average modeling for hepatic iron  
37  
38 443 quantification in the presence of fat. J Magn Reson Imaging.  
39  
40 444 2019;50(5):1620-1632.  
41  
42 445

## 446 **Figures**

- 447 **Figure 1.** The red part of this picture is the location of kashgar in Xinjiang, China.  
448 Kashgar is located in the south of Xinjiang, and it has a very high incidence of  
449 tuberculosis.  
450  
451 **Figure 2.** Graph of the tuberculosis (TB) incidence in Kashgar from January 2005 to  
452 December 2017. The curve of TB incidence showed strong nonlinear characteristics  
453 from 2005 to 2014, and the TB incidence increased significantly from 2015 to 2017.

1  
2  
3  
4 454

5 455 **Figure 3.** Autocorrelation function (ACF) and partial autocorrelation function (PACF)  
6  
7 456 graphs of modeling data. As the delay of the lag order, the autocorrelation coefficients  
8  
9 457 were trailing and the partial correlation coefficients were truncated, so it was suitable  
10  
11 458 to establish the AR model.

12  
13 459

14  
15 460 **Figure 4.** Autocorrelation function (ACF) and partial autocorrelation function (PACF)  
16  
17 461 graphs of residuals of AR((1,2,8)) model. Autocorrelation coefficients and partial  
18  
19 462 correlation coefficients were almost in 95% confidence interval, so AR ((1,2,8))  
20  
21 463 model could extract the information of original data well.

22  
23 464

24  
25 465 **Figure 5.** The numbers of neurons in AR-Elman model and the corresponding root  
26  
27 466 mean square error (RMSE). When the number of neuron was 6, the RMSE was the  
28  
29 467 smallest, and the AR-Elman model fitting ability was the strongest.

30  
31 468

32  
33 469 **Figure 6.** Fitting comparison graph of AR ((1,2,8)) model and AR-Elman model.

34  
35 470 Red line stands for the original tuberculosis (TB) incidence curve, green line stands  
36  
37 471 for AR((1,2,8)) model fitting curve, blue line stands for AR-Elman model fitting  
38  
39 472 curve. The fitting ability of AR-Elman hybrid model was slightly better than that of  
40  
41 473 the single AR((1,2,8)).

42  
43 474

## 45 475 **Tables**

46  
47 476 **Table 1.** The Augmented Dickey-Fuller (ADF) test of the training data

|                                        | t-Statistics | p-value |
|----------------------------------------|--------------|---------|
| Augmented Dickey-Fuller test statistic | -3.47        | 0.01    |
| Test critical values:                  |              |         |
| 1% level                               | -3.48        |         |
| 5% level                               | -2.88        |         |
| 10% level                              | -2.58        |         |

48  
49  
50  
51  
52  
53  
54  
55  
56  
57  
58  
59 477  
60

478

479 **Table 2.** Parameter estimates of the tentative models with their Akaike information  
 480 criterion (AIC) and Schwarz criterion (SC) values.

| Models        | Variables | Coefficients | Std. Errors | t    | p-values | AIC  | SC   |
|---------------|-----------|--------------|-------------|------|----------|------|------|
| AR (2)        | C         | 21.42        | 2.17        | 9.86 | <0.01    | 6.55 | 6.62 |
|               | AR(1)     | 0.42         | 0.08        | 5.20 | <0.01    |      |      |
|               | AR(2)     | 0.34         | 0.08        | 4.17 | <0.01    |      |      |
| AR((1, 2, 7)) | C         | 22.93        | 3.73        | 6.14 | <0.00    | 6.53 | 6.62 |
|               | AR(1)     | 0.41         | 0.08        | 5.10 | <0.00    |      |      |
|               | AR(2)     | 0.32         | 0.08        | 3.88 | <0.00    |      |      |
|               | AR (7)    | 0.12         | 0.007       | 1.74 | 0.08     |      |      |
| AR((1, 2, 8)) | C         | 23.53        | 4.56        | 5.16 | <0.01    | 6.53 | 6.61 |
|               | AR(1)     | 0.40         | 0.08        | 4.84 | <0.01    |      |      |
|               | AR(2)     | 0.32         | 0.08        | 3.96 | <0.01    |      |      |
|               | AR (8)    | 0.15         | 0.07        | 2.17 | 0.03     |      |      |
| AR((1, 2, 9)) | C         | 29.07        | 15.53       | 1.87 | 0.06     | 6.46 | 6.55 |
|               | AR(1)     | 0.37         | 0.08        | 4.64 | <0.01    |      |      |
|               | AR (2)    | 0.31         | 0.08        | 3.93 | <0.01    |      |      |
|               | AR (9)    | 0.26         | 0.07        | 3.80 | <0.01    |      |      |

481

482 Table 3. Comparison results of in-sample fitting and out-of-sample forecasting  
 483 performance for the AR((1,2,8)) model and AR-Elman model.

| Models      | Fitted efficacy |      |        | Models      | Forecasted efficacy |      |        |
|-------------|-----------------|------|--------|-------------|---------------------|------|--------|
|             | RMSE            | MAE  | MAPE   |             | RMSE                | MAE  | MAPE   |
| AR((1,2,8)) | 6.15            | 4.33 | 0.2585 | AR((1,2,8)) | 10.88               | 8.75 | 0.2029 |
| AR-Elman    | 3.78            | 3.38 | 0.1837 | AR-Elman    | 8.86                | 7.29 | 0.2006 |

484

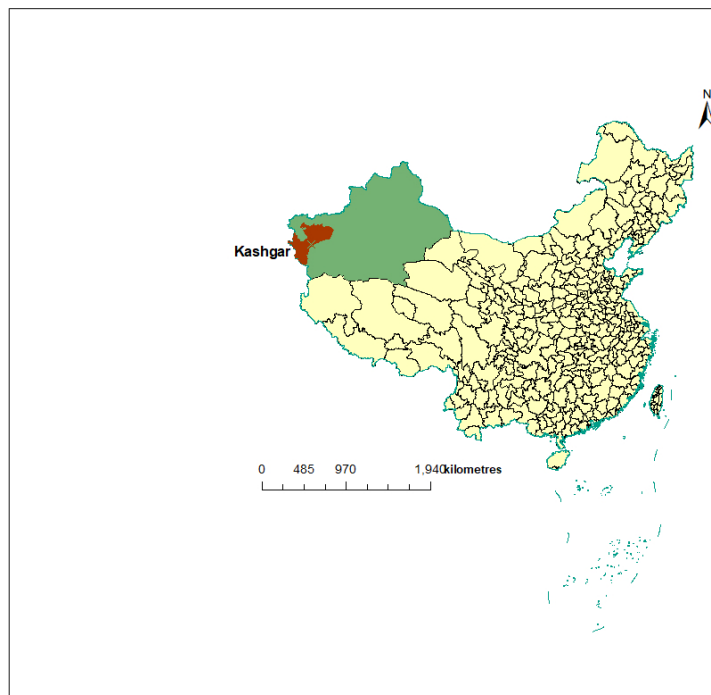

Figure 1. The red part of this picture is the location of kashgar in Xinjiang, China.

296x210mm (96 x 96 DPI)

1  
2  
3  
4  
5  
6  
7  
8  
9  
10  
11  
12  
13  
14  
15  
16  
17  
18  
19  
20  
21  
22  
23  
24  
25  
26  
27  
28  
29  
30  
31  
32  
33  
34  
35  
36  
37  
38  
39  
40  
41  
42  
43  
44  
45  
46  
47  
48  
49  
50  
51  
52  
53  
54  
55  
56  
57  
58  
59  
60

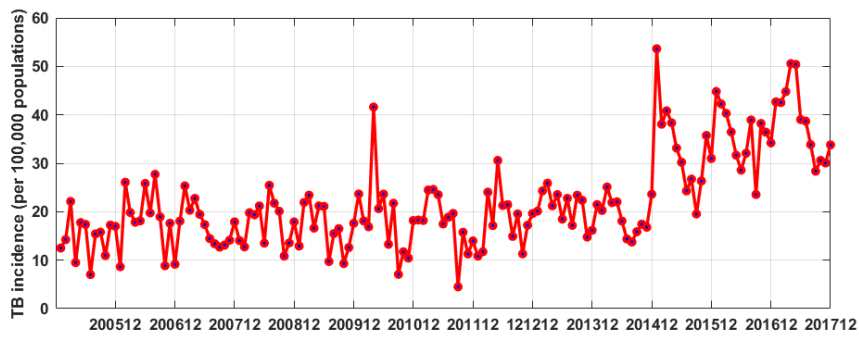

Figure 2

285x99mm (96 x 96 DPI)



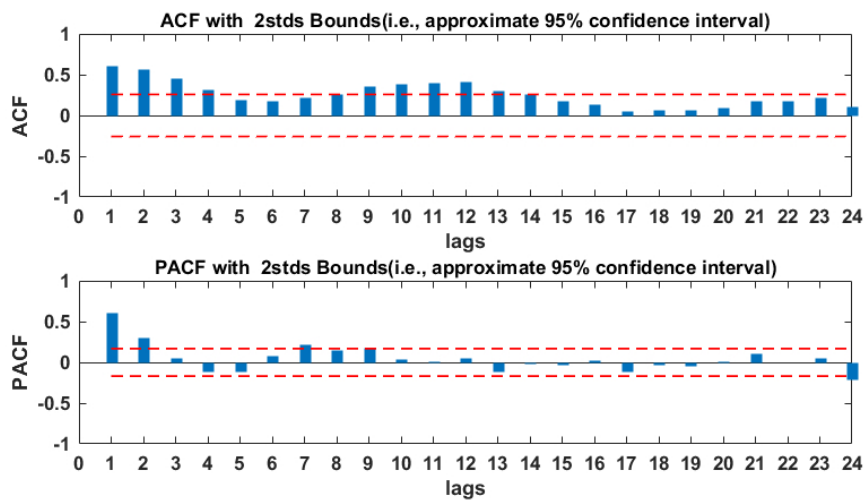

Figure 3. The ACF and PACF diagrams of modeling data

233x121mm (96 x 96 DPI)

1  
2  
3  
4  
5  
6  
7  
8  
9  
10  
11  
12  
13  
14  
15  
16  
17  
18  
19  
20  
21  
22  
23  
24  
25  
26  
27  
28  
29  
30  
31  
32  
33  
34  
35  
36  
37  
38  
39  
40  
41  
42  
43  
44  
45  
46  
47  
48  
49  
50  
51  
52  
53  
54  
55  
56  
57  
58  
59  
60

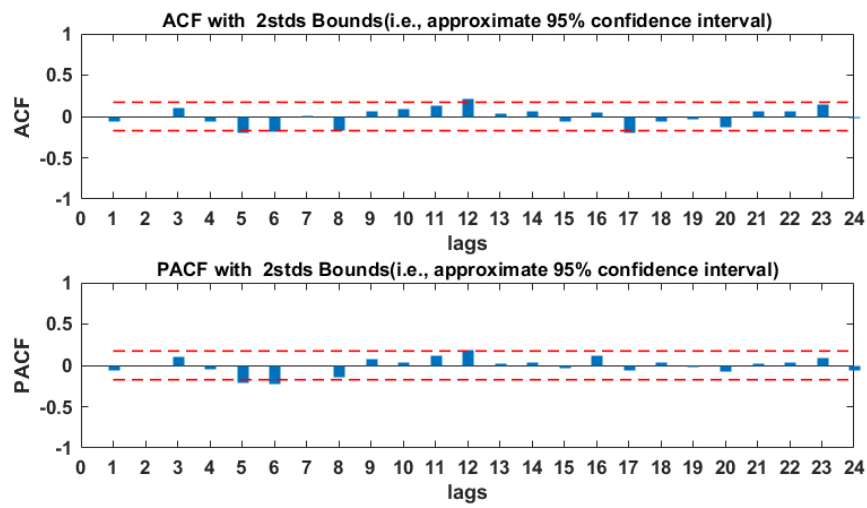

Figure 4. The ACF and PACF graphs of residual errors of AR ((1,2,8)) Model

233x122mm (96 x 96 DPI)

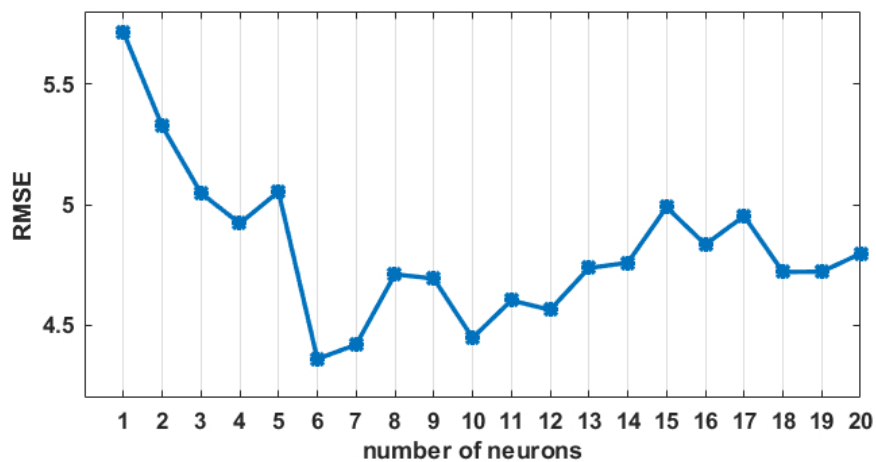

Figure 5. The numbers of neurons in AR-Elman Model and the corresponding RMSE Values

196x95mm (96 x 96 DPI)

1  
2  
3  
4  
5  
6  
7  
8  
9  
10  
11  
12  
13  
14  
15  
16  
17  
18  
19  
20  
21  
22  
23  
24  
25  
26  
27  
28  
29  
30  
31  
32  
33  
34  
35  
36  
37  
38  
39  
40  
41  
42  
43  
44  
45  
46  
47  
48  
49  
50  
51  
52  
53  
54  
55  
56  
57  
58  
59  
60

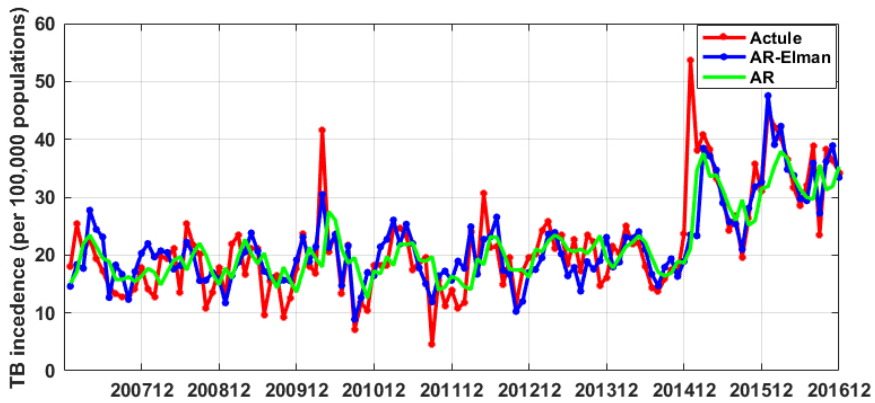

Figure 6

234x99mm (96 x 96 DPI)

# BMJ Open

## Predictive study of tuberculosis incidence by time series method and Elman neural network in Kashgar, China

|                                 |                                                                                                                                                                                                                                                                                                                                                                                                                                                                                                                                                                                                                                                                                                                                                                                                           |
|---------------------------------|-----------------------------------------------------------------------------------------------------------------------------------------------------------------------------------------------------------------------------------------------------------------------------------------------------------------------------------------------------------------------------------------------------------------------------------------------------------------------------------------------------------------------------------------------------------------------------------------------------------------------------------------------------------------------------------------------------------------------------------------------------------------------------------------------------------|
| Journal:                        | <i>BMJ Open</i>                                                                                                                                                                                                                                                                                                                                                                                                                                                                                                                                                                                                                                                                                                                                                                                           |
| Manuscript ID                   | bmjopen-2020-041040.R2                                                                                                                                                                                                                                                                                                                                                                                                                                                                                                                                                                                                                                                                                                                                                                                    |
| Article Type:                   | Original research                                                                                                                                                                                                                                                                                                                                                                                                                                                                                                                                                                                                                                                                                                                                                                                         |
| Date Submitted by the Author:   | 18-Nov-2020                                                                                                                                                                                                                                                                                                                                                                                                                                                                                                                                                                                                                                                                                                                                                                                               |
| Complete List of Authors:       | Zheng, Yanling; Xinjiang Medical University, College of Medical Engineering and Technology<br>Zhang, Xueliang; Xinjiang Medical University, College of Medical Engineering and Technology, Xinjiang Medical University<br>Wang, Xijiang; Center for Disease Control and Prevention of Xinjiang Uygur Autonomous Region, Center for Disease Control and Prevention of Xinjiang Uygur Autonomous Region, Urumqi 830001, People's Republic of China<br>Wang, Kai; Xinjiang Medical University, College of Medical Engineering and Technology, Urumqi 830054, People's Republic of China<br>Cui, Yan; Center for Disease Control and Prevention of Xinjiang Uygur Autonomous Region, Center for Disease Control and Prevention of Xinjiang Uygur Autonomous Region, Urumqi 830001, People's Republic of China |
| <b>Primary Subject Heading</b>: | Health services research                                                                                                                                                                                                                                                                                                                                                                                                                                                                                                                                                                                                                                                                                                                                                                                  |
| Secondary Subject Heading:      | Health services research, Infectious diseases                                                                                                                                                                                                                                                                                                                                                                                                                                                                                                                                                                                                                                                                                                                                                             |
| Keywords:                       | International health services < HEALTH SERVICES ADMINISTRATION & MANAGEMENT, Tuberculosis < INFECTIOUS DISEASES, STATISTICS & RESEARCH METHODS                                                                                                                                                                                                                                                                                                                                                                                                                                                                                                                                                                                                                                                            |
|                                 |                                                                                                                                                                                                                                                                                                                                                                                                                                                                                                                                                                                                                                                                                                                                                                                                           |

SCHOLARONE™  
Manuscripts



I, the Submitting Author has the right to grant and does grant on behalf of all authors of the Work (as defined in the below author licence), an exclusive licence and/or a non-exclusive licence for contributions from authors who are: i) UK Crown employees; ii) where BMJ has agreed a CC-BY licence shall apply, and/or iii) in accordance with the terms applicable for US Federal Government officers or employees acting as part of their official duties; on a worldwide, perpetual, irrevocable, royalty-free basis to BMJ Publishing Group Ltd ("BMJ") its licensees and where the relevant Journal is co-owned by BMJ to the co-owners of the Journal, to publish the Work in this journal and any other BMJ products and to exploit all rights, as set out in our [licence](#).

The Submitting Author accepts and understands that any supply made under these terms is made by BMJ to the Submitting Author unless you are acting as an employee on behalf of your employer or a postgraduate student of an affiliated institution which is paying any applicable article publishing charge ("APC") for Open Access articles. Where the Submitting Author wishes to make the Work available on an Open Access basis (and intends to pay the relevant APC), the terms of reuse of such Open Access shall be governed by a Creative Commons licence – details of these licences and which [Creative Commons](#) licence will apply to this Work are set out in our licence referred to above.

Other than as permitted in any relevant BMJ Author's Self Archiving Policies, I confirm this Work has not been accepted for publication elsewhere, is not being considered for publication elsewhere and does not duplicate material already published. I confirm all authors consent to publication of this Work and authorise the granting of this licence.

1  
2  
3  
4 Predictive study of tuberculosis incidence by time series method  
5  
6  
7 and Elman neural network in Kashgar, China

8  
9 **Yanling Zheng<sup>1</sup>, XueLiang Zhang<sup>1\*</sup>, XiJiang Wang<sup>2</sup>, Kai Wang<sup>1</sup>, Yan Cui<sup>2\*</sup>**

10  
11 1. College of Medical Engineering and Technology, Xinjiang Medical University,  
12  
13 Urumqi 830054, People's Republic of China

14  
15 2. Center for Disease Control and Prevention of Xinjiang Uygur Autonomous Region,  
16  
17 Urumqi 830001, People's Republic of China

18  
19  
20  
21  
22  
23  
24  
25  
26  
27  
28  
29  
30  
31  
32  
33  
34  
35  
36  
37  
38  
39  
40  
41  
42  
43  
44  
45  
46  
47  
48  
49  
50  
51  
52  
53  
54  
55  
56  
57  
58  
59 

---

**Xueliang Zhang :<sup>\*</sup> Corresponding author, zhengyl\_math@sina.cn**

60 **Yan Cui :<sup>\*</sup> Corresponding author, cuiyan\_jk@sina.com**

1  
2  
3  
4 **Abstract:**

5  
6 **Objective:** The incidence of tuberculosis (TB) in Kashgar, China, is very high, so the  
7  
8 prevention and control of TB is arduous. However, there is little quantitative  
9  
10 prediction study on the TB incidence, therefore, it is urgent to do prediction analysis  
11  
12 of TB incidence in Kashgar, which can provide scientific reference for the prevention  
13  
14 and control of TB.

15  
16 **Methods:** Based on the monthly TB incidence, a single Box-Jenkins method and a  
17  
18 Box-Jenkins and Elman neural network (ElmanNN) hybrid method were used to do  
19  
20 prediction analysis of TB incidence in Kashgar. Root mean square error (RMSE),  
21  
22 mean absolute error (MAE) and mean absolute percentage error (MAPE) were used to  
23  
24 measure the prediction accuracy.

25  
26 **Results:** After careful analysis, the single AR((1,2,8)) model and  
27  
28 AR((1,2,8))-ElmanNN (AR-Elman) hybrid model were established, and the optimal  
29  
30 neurons value of the AR-Elman hybrid model was 6. For the fitting dataset, the  
31  
32 RMSE, MAE and MAPE were 6.15, 4.33 and 0.2858, respectively, for the AR((1,2,8))  
33  
34 model, and 3.78, 3.38 and 0.1837, respectively, for the AR-Elman hybrid model. For  
35  
36 the forecasting dataset, the RMSE, MAE and MAPE were 10.88, 8.75 and 0.2029,  
37  
38 respectively, for the AR((1,2,8)) model, and 8.86, 7.29 and 0.2006, respectively, for  
39  
40 the AR-Elman hybrid model.

41  
42 **Conclusions:** Both the single AR((1,2,8)) model and AR-Elman model could be used  
43  
44 to predict the TB incidence in Kashgar, but the modeling and validation  
45  
46 scale-dependent measures (RMSE, MAE and MAPE) in the AR((1,2,8)) model were  
47  
48 inferior to those in the AR-Elman hybrid model, which indicated that AR-Elman  
49  
50 hybrid model was better than AR((1,2,8)) model. The Box-Jenkins and Elman neural  
51  
52 network hybrid method can be highlighted in predicting the temporal trends of TB  
53  
54 incidence in Kashgar, which may act as the potential for far-reaching implications for  
55  
56 prevention and control of TB.

57 **Keywords:** Tuberculosis; Prediction; Box-Jenkins method; Elman neural network  
58  
59  
60



### 30 **Strengths and limitations of this study:**

- 31 1. The incidence of tuberculosis (TB) is very high in Kashgar, therefore, it is urgent to  
32 do the prediction analysis of TB.
- 33 2. In the study, AR-Elman model with high prediction accuracy was established, it  
34 can be used to predict the development of TB in Kashgar, China.
- 35 3. The long-term prediction accuracy of AR-Elman hybrid model will decline.

### 36 **Introduction**

37 Tuberculosis (TB) is still a major global public health problem and the ninth  
38 leading cause of death in the world.<sup>1-3</sup> Because TB is contagious, patient resistance is  
39 low, treatment time is long, patients' labor force is lost and their contribution to  
40 society is reduced, so TB brings great burden to society and economy. All countries in  
41 the world are working hard to fight tuberculosis. In 2018, the number of new reported  
42 TB cases was about 10 million; this figure has remained relatively stable in recent  
43 years. The latest treatment results showed that the global TB treatment success rate  
44 was 83%. World Health Organization (WHO) has set targets for the stop TB strategy.  
45 The targets mentioned that by 2030, on the basis of the work in 2015, TB deaths will  
46 reduce by 90%, and annual new TB cases will reduce by 80%.<sup>4</sup> In order to achieve  
47 these goals, TB prevention and control services must be provided in the broad context  
48 of universal health coverage, joint action must be taken to address the social and  
49 economic consequences of TB, and technological breakthroughs should be achieved  
50 by 2025 to make the TB incidence decline faster than that at any time in history.  
51 According to the global tuberculosis report 2019<sup>4</sup>, China has the second highest  
52 number of TB cases in the world.<sup>4</sup> The TB incidence in western China was much  
53 higher than that in eastern and central China. The province with the highest TB  
54 incidence in the west is Xinjiang province. From 2016 to 2017, the annual TB  
55 incidence in Xinjiang was 185.66/100,000 and 202.58/100,000, while the annual TB  
56 incidence from 2016 to 2017 in China was 61/100,000 and 60.53/100,000,  
57 respectively, it is nearly three times higher in Xinjiang than that national level.

58 There are 14 Prefectural-Level cities in Xinjiang, China, among which Kashgar  
59 has a very high TB incidence rate. From 2016 to 2017, the annual TB incidences in

1  
2  
3  
4 60 Kashgar were 427.44/100,000 and 465.33/100,000, respectively, which were nearly 7  
5  
6 61 times higher than that of the national level. Doing a good job in the prevention and  
7  
8 62 control of TB in Kashgar is an important link to reduce the TB incidence in Xinjiang.

9  
10 63 Mastering the changing law of the incidence of infectious diseases, using the  
11  
12 64 existing surveillance data to analyze, then, to predict the possible epidemic trend and  
13  
14 65 provide reference data for the prevention, can better control the occurrence and  
15  
16 66 epidemic of infectious diseases. Prediction of infectious diseases is to predict the  
17  
18 67 occurrence, development and epidemic trend of infectious diseases according to the  
19  
20 68 occurrence, development law and related factors of infectious diseases, based on  
21  
22 69 analysis, judgment and mathematical model, etc.

23  
24 70 For study of quantitative prediction of infectious diseases, there are many  
25  
26 71 methods, such as grey prediction method <sup>5</sup>, exponential smoothing prediction method  
27  
28 72 <sup>6,7</sup>, dynamic model prediction method <sup>8</sup>, Box-Jenkins method <sup>9</sup>, neural network  
29  
30 73 method <sup>10</sup>, etc., with the deepening of prediction research, more and more scholars  
31  
32 74 like to use the Box-Jenkins method <sup>11-21</sup>, there are many different models in this  
33  
34 75 method, and if appropriate models are established according to the characteristics of  
35  
36 76 time series, high prediction ability often can be obtained. Neural network has strong  
37  
38 77 nonlinear mapping ability, in which Elman neural network is composed of input layer,  
39  
40 78 hidden layer, connection layer and output layer. The Elman network has dynamic  
41  
42 79 memory function, and it is very suitable for time series prediction. At present, the  
43  
44 80 Elman network is widely used in various fields, and has achieved successful  
45  
46 81 prediction results. <sup>22-26</sup> Sometimes, the prediction effect of a single model is not ideal,  
47  
48 82 in order to further improve the prediction accuracy, many studies adopt the combined  
49  
50 83 model prediction method <sup>27-29</sup>, the combined model can absorb the advantages of two  
51  
52 84 or more methods so as to achieve a higher prediction accuracy.

53  
54 85 The TB incidence of Kashgar is very high, and it is urgent to do a good job in the  
55  
56 86 prevention and control of TB in this area. Accurate prediction of TB incidence is a  
57  
58 87 prerequisite for prevention and control, which can help advance resource planning and  
59  
60 88 policy formulation. In this study, the popular Box-Jenkins time series method was  
89 89 used to build model for predicting the TB incidence in Kashgar, in order to improve

1  
2  
3  
4 90 the prediction accuracy, the Elman neural network with strong nonlinear information  
5  
6 91 capture ability was used to construct the combined model for prediction analysis.

## 7 8 92 **Materials and Methods**

### 9 10 93 **Study area and data Sources**

11  
12 94 We selected Kashgar as the study site (see Figure 1). This area is located in the  
13  
14 95 south of Xinjiang province in China with an area of approximately 16.2 thousand  
15  
16 96 square kilometers and a permanent population of 4.64 million in 2018. TB case data  
17  
18 97 from January 2005 to December 2017 were obtained from the Center for Disease  
19  
20 98 Control and Prevention of Xinjiang Uygur Autonomous Region. Population data were  
21  
22 99 obtained from Xinjiang Bureau of Statistics. Based on the population data and TB  
23  
24 100 case data, we calculated the incidence data of TB.

### 25 26 101 **Patient and public involvement**

27  
28 102 Patients were not involved in the design of this study as it involved only  
29  
30 103 observational analysis of an anonymised, pre-existing, routinely collected dataset.

### 31 32 104 **Autoregressive moving average (ARMA) model**

33  
34 105 ARMA model<sup>30</sup> is an important time series analysis and prediction model in  
35  
36 106 Box-Jenkins method, also known as auto-regression moving average model. The  
37  
38 107 ARMA (p,q) model is a model with autocorrelation order p and moving average order  
39  
40 108 q, p and q are judged by autocorrelation function (ACF) and partial autocorrelation  
41  
42 109 function (PACF) diagram of stationary data. If the original data is stable, the  
43  
44 110 autocorrelation coefficients are trailing, and the partial correlation coefficients are the  
45  
46 111 p-order truncated, then q=0, the ARMA(p,q) model is recorded as AR(p), and its  
47  
48 112 expression is as follows:

$$39 113 X_t = c + \phi_1 X_{t-1} + \phi_2 X_{t-2} + \dots + \phi_p X_{t-p} + \varepsilon_t,$$

40 114 where,  $X_t$  is the observed value at t,  $\phi_1, \dots, \phi_p$  are model parameters, c is a constant, if  
41  
42 115 only  $\phi_1, \phi_2, \phi_p$  are not zeros, then, The AR(p) model becomes a sparse model, which  
43  
44 116 can be recorded as AR((1,2,p)).

45  
46 117 If the original data is stable, the autocorrelation coefficients are q-order truncated

1  
2  
3  
4 118 and the partial correlation coefficients are trailing, then  $p=0$  and the ARMA( $p,q$ )  
5  
6 119 model becomes MA( $q$ ), its expression is as follows:

7  
8 120 
$$X_t = \mu + \varepsilon_t + \theta_1 \varepsilon_{t-1} + \theta_2 \varepsilon_{t-2} + \dots + \theta_q \varepsilon_{t-q},$$

9  
10 121 where,  $\mu$  is the expected value of  $X_t$ .  $\theta_1, \dots, \theta_p$  are model parameters.

11  
12 122 If the original data is stable, the autocorrelation coefficients are trailing, and the  
13  
14 123 partial correlation coefficients are also trailing, then the expression of the ARMA ( $p, q$ )  
15  
16 124 model is as follows:

17  
18 125 
$$X_t = c + \phi_1 X_{t-1} + \phi_2 X_{t-2} + \dots + \phi_p X_{t-p} + \varepsilon_t - \theta_1 \varepsilon_{t-1} - \theta_2 \varepsilon_{t-2} - \dots - \theta_q \varepsilon_{t-q}.$$

19  
20 126 There are four main steps in ARMA modeling:

21  
22 127 First step. The prerequisite for ARMA modeling is the stationary of time series.  
23  
24 128 Check whether the data is stable by Augmented Dickey-Fuller (ADF) unit root test. In  
25  
26 129 this study, the significant level probability (p-value) is 0.05, and if the p-value is less  
27  
28 130 than 0.05, then, the data is stable. By observing the autocorrelation function (ACF)  
29  
30 131 and partial autocorrelation function (PACF) of the stable data, we can determine the  
31  
32 132 possible values of  $p$  and  $q$  and establish the possible ARMA ( $p, q$ ) model.

33  
34 133 Second step. The parameters of ARMA( $p, q$ ) model are estimated by maximum  
35  
36 134 likelihood estimation or least square estimation, and the model parameters are tested.  
37  
38 135 If p-value is less than 0.05, the parameters have statistical significance. The best  
39  
40 136 model is determined according to the value of Akaike information criterion (AIC),  
41  
42 137 Schwarz criterion (SC) and Goodness of Fit ( $R^2$ ) of model. The smaller AIC and SC  
43  
44 138 are, the larger the  $R^2$  is, and the better the model is.

45  
46 139 Third step. To determine whether the established ARMA ( $p, q$ ) model is suitable.  
47  
48 140 The residual sequence of a suitable model shall be the white noise process, and its  
49  
50 141 ACF and PACF coefficients should be within twice the standard deviation range,  
51  
52 142 otherwise, it is considered that the extraction information of the established model is  
53  
54 143 not sufficient, and it is necessary to consider improving the accuracy of the model.

54  
55 144 Fourth step. Using the established model to do prediction and analysis.

56  
57 145 **Elman neural network model**

58  
59 146 The Elman neural network (see Figure 2) is proposed by Elman in 1990<sup>31</sup>. The  
60

1  
2  
3  
4 147 model is generally divided into four layers: input layer, hidden layer, receiving layer  
5  
6 148 and output layer. The characteristic of Elman network is that the output of the hidden  
7  
8 149 layer is connected to the input of the hidden layer through the delay and storage of the  
9  
10 150 receiving layer, which makes it sensitive to the data of the historical state. The  
11  
12 151 addition of the internal feedback network increases the ability of the network itself to  
13  
14 152 deal with dynamic information, thus achieving the purpose of dynamic modeling.

15 153 The mathematical structure of the Elman neural network is as follows:

16  
17 154 
$$x(k)=f(w^1x_c(k)+ w^2u(k-1))$$

18  
19 155 
$$x_c(k)= \alpha x_c(k-1)+ x(k-1)$$

20  
21 156 
$$y(k)=g(w^3x(k))$$

22  
23 157 Where,  $w^1$  is the connection weight matrix between the contact unit and the  
24  
25 158 hidden layer unit,  $w^2$  is the connection weight matrix between the input unit and the  
26  
27 159 hidden layer unit,  $w^3$  is the connection weight matrix between the hidden layer unit  
28  
29 160 and the output unit.  $x_c(k)$  and  $x(k)$  represent the output of the contact unit and the  
30  
31 161 hidden layer unit, respectively,  $y(k)$  represents the output of the output unit,  $\alpha$  is a  
32  
33 162 self-connected feedback gain factor,  $0 \leq \alpha < 1$ ,  $f(x)$  often takes the sigmoid function.

34 163 There are four main steps in Elman neural network modeling:

35 164 First step. Data standardization processing. Data standardization is scaling the  
36  
37 165 data to a small specific interval. In order to remove the unit limit of the data and  
38  
39 166 convert it into dimensionless pure value, it is convenient for the index of different  
40  
41 167 units or order of magnitude to be compared and weighted. In our study, we use  
42  
43 168 function package `mapminmax()` to standardize the data, standardized data is in  $[-1,1]$   
44  
45 169 range.

46  
47 170 Second step. Determine the input layer, the output layer. Generally, the input and  
48  
49 171 output layer are determined according to the characteristics of the data and the needs  
50  
51 172 of the analysis.

52  
53 173 Third step. Set the parameters of the Elman model, such as training epochs and  
54  
55 174 goals, etc., in our study, training epochs and goals of Elman neural network were set  
56  
57 175 to 2000 and 0.00001, respectively. To determine the number of neurons in the hidden  
58  
59 176 layer, so that the error of the established Elman model is minimized. At present, there  
60  
177 is no ideal analytical expression for the number of neurons in the hidden layer. The  
178 number of neurons has a great influence on the performance of the network. When the  
179 number of neurons is too large, it will lead to that the network learning time is too

180 long, the generalization performances are not good, and even the convergence failure,  
 181 but when the number of neurons is too small, the fault-tolerant ability of the network  
 182 is poor. In general, the number of neurons does not exceed 20.<sup>32</sup> In this study, matlab  
 183 cyclic structure was used to find the optimal number of neurons by comparing the  
 184 RMSE values of Elman networks with neurons 1 to 20.

185 Fourth step. According to the optimal number of neurons in the hidden layer, the  
 186 Elman model is constructed, and then the prediction and analysis can be made.

### 187 **Model comparison measures**

188 Three performance indexes, root mean square error (RMSE), mean absolute error  
 189 (MAE) and mean absolute percentage error (MAPE) were used to assess the fitting  
 190 and forecasting accuracy of two models. The smaller these three values are, the better  
 191 the model is. Their expressions are as follows<sup>10</sup>:

$$192 \quad RMSE = \sqrt{\frac{\sum_{t=1}^n (X_t - \hat{X}_t)^2}{n}},$$

$$193 \quad MAE = \frac{\sum_{t=1}^n |X_t - \hat{X}_t|}{n},$$

$$194 \quad MAPE = \frac{\sum_{t=1}^n \left| \frac{X_t - \hat{X}_t}{X_t} \right| \times 100}{n},$$

195 where  $\hat{X}_t$  is the simulating and forecasting values,  $X_t$  is the actual values and  $n$   
 196 is the number of observations.

### 197 **Statistical software**

198 All data analyses were conducted using Eviews7, matlab2015b, Arcmap10.1.

### 199 **Results**

200 From January 2005 to December 2017, the number of reported TB cases was  
 201 141984 in Kashgar, Xinjiang, the average annual TB cases were 7888 and the average  
 202 annual incidence was 191.18. Figure 3 showed the time series graph of the TB  
 203 incidence. It can be seen from the Figure 3 that the curve of TB incidence showed  
 204 strong nonlinear characteristics from 2005 to 2014, and the TB incidence from 2015  
 205 to 2017 were significantly higher than that of previous years.

206 The data of TB incidence from January 2005 to December 2017 were divided  
 207 into two parts. The data from January 2005 to December 2016 were used to build

208 model and the data from January 2017 to December 2017 were used to test the model.

### 209 **Establishment of ARMA Model**

210 ARMA Modeling requires data stability, so, first of all, the stability of the  
211 modeling part of the data was verified by ADF test. The results of ADF test showed  
212 that p-value was less than 0.05(see Table 1), which indicated that the data was stable  
213 and could be directly used to build the model. Secondly, the ACF and PACF graphs  
214 of the modeling data were plotted (see Figure 4), it was obvious from Figure 4 that the  
215 autocorrelation coefficients were trailing distribution, and the partial correlation  
216 coefficients were almost a second-order truncated distribution, only at the lag 7, 8 and  
217 9, the correlation coefficients were a little large. Based on this situation, we  
218 considered establishing four models, such as AR(2), AR((1,2,7)), AR((1,2,8)) and  
219 AR((1,2,9)). The least square method was used to test the parameters of the four  
220 models. The results of the test were shown in Table 2; we can see that, of the four  
221 models, only AR (2) model and AR((1,2,8)) passed the parameter test. Comparing the  
222 two models, it was found that, the AR((1,2,8)) model had smaller AIC and SC values,  
223 and the  $R^2$  values of AR((1,2,8)) were larger than the  $R^2$  values of AR (2), so the AR  
224 (2) model was abandoned. Then, the residual analysis of the AR((1,2,8)) model was  
225 carried out, the autocorrelation and partial correlation coefficient of the residuals were  
226 almost all within two times standard deviation, and only in the lag 5,6,12, they were  
227 beyond the range of two times standard deviation (see Figure 5), which indicated that  
228 the AR((1,2,8)) model could be used to roughly predict the TB incidence in Kashgar.  
229 We used AR((1,2,8)) model to fit the TB incidence from September 2005 to  
230 December 2016, the fitting RMSE ,MAE and MAPE were 6.15, 4.33 and 0.2858,  
231 respectively; we used AR((1,2,8)) model to predict the TB incidence from January  
232 2017 to December 2017, the prediction RMSE, MAE and MAPE were 10.88 , 8.75  
233 and 0.2029, respectively.

### 234 **Establishment of AR-Elman Model**

235 In order to improve the prediction accuracy of the AR((1,2,8)) model, we tried  
236 to establish the AR((1,2,8))-Elman hybrid model. The fitting sequence of AR((1,2,8))

237 model was used as input variable, and the actual TB incidence was used as output  
 238 variable. Due to the a little similarity of the annual trend of TB incidence in Kashgar  
 239 (see Figure 3), therefore, we created twelve time-lagged variables as input features.  
 240 Supposing that  $x_t$  represented the TB incidence at time t, and then the input matrix and  
 241 the output matrix of modeling data set used in this study were designed as follows  
 242 ( $N=12$ ):

$$243 \quad \text{input matrix} = \begin{bmatrix} x_1 & x_2 & \dots & x_i \\ x_2 & x_3 & \dots & x_{i+1} \\ \dots & \dots & \dots & \dots \\ x_N & x_{N+1} & \dots & \dots \end{bmatrix}, \text{output matrix} = [x_{N+1} \quad x_{N+2} \quad \dots \quad x_{N+i}]$$

244 We selected twelve as the number of input layers of AR-Elman network and  
 245 one as the number of output layers representing the forecast value. By the matlab  
 246 cyclic structure, we selected the optimal number of neurons between 1 and 20, and  
 247 finally we found when the number of neurons was 6 (see Figure 6), the RMSE was the  
 248 smallest, and the AR-Elman was optimal. We used the AR-Elman model to fit the  
 249 training data, RMSE was 3.78, MAE was 3.38, MAPE was 0.1837, and the  $R^2$  of the  
 250 model was 0.83; we used the AR-Elman model to predict the TB incidence from  
 251 January 2017 to December 2017, RMSE was 8.86, MAE was 7.29, and MAPE was  
 252 0.2006. The fitting curves of AR((1,2,8)) model and AR-Elman model, and the  
 253 prediction curve of AR-Elman model were shown in Figure 7. Comparison results of  
 254 the AR((1,2,8)) model and AR-Elman model were shown in Table 3, both the fitting  
 255 RMSE, MAE and MAPE and the predicting RMSE, MAE and MAPE of the  
 256 AR-Elman model were smaller than those of the single AR((1,2,8)) model, which  
 257 indicated that the AR-Elman combined model established in this study was more  
 258 suitable for predicting the TB incidence in Kashgar.

## 259 Discussion

260 According to the WHO 2019 Global Tuberculosis report <sup>4</sup>, around the world, TB  
 261 mortality was down about 3% every year, the incidence was down about 2% every  
 262 year, 16% of TB patients died of the disease. <sup>4</sup> But the rate of decline has not reached  
 263 the pace of the stop Tuberculosis Strategy Plan. Therefore, it is necessary to  
 264 strengthen the prevention and control of tuberculosis. In order to significantly narrow  
 265 these gaps, greater progress must be made in a group of countries with a high burden  
 266 of tuberculosis. The burden of TB in China ranks second in the world, and Xinjiang is  
 267 the province with the highest incidence of TB in China, and Kashgar is the area with



1  
2  
3  
4 268 the high TB incidence in Xinjiang. Therefore, it is urgent to do a good job in the  
5  
6 269 prevention and control of TB in Kashgar.

7  
8 270 The prediction and early warning of infectious diseases is an important link in  
9  
10 271 the prevention and control of infectious diseases.<sup>32-34</sup> Therefore, this study carried out  
11  
12 272 research from the point of view of prediction to explore an accurate prediction model  
13  
14 273 and do prediction analysis of TB incidence in Kashgar, so as to provide scientific  
15  
16 274 reference for the prevention and control of the disease in this area. The Box -Jenkins  
17  
18 275 method is a popular time series prediction method, this method has good prediction  
19  
20 276 performance and high prediction accuracy; Elman Neural network can capture  
21  
22 277 nonlinear information of time series data very well. In this study, the two methods  
23  
24 278 were combined to study the prediction model of TB incidence in Kashgar.

25  
26 279 Many studies have found that Box-Jenkins method has a good ability of fitting  
27  
28 280 and forecasting. For stationary time series that do not contain seasonality, it is more  
29  
30 281 suitable to use the ARMA model of the Box-Jenkins method to do prediction analysis  
31  
32 282 <sup>35</sup>, for non-stationary time series of infectious diseases with obvious seasonality, it is  
33  
34 283 more suitable to use seasonal autoregressive integrated moving average (SARIMA)  
35  
36 284 model of the Box-Jenkins method for prediction analysis.<sup>9-12</sup> In our study, from Figure  
37  
38 285 3, we could see that the seasonality of the TB incidence in Kashgar from 2005 to 2014  
39  
40 286 was not obvious, there was only a certain seasonality from 2015 to 2017, and we  
41  
42 287 found that the time series of TB incidence was stable by ADF unit root test, and the  
43  
44 288 autocorrelation and partial correlation coefficients of modeling data at lag 12, 24 were  
45  
46 289 not obviously large, therefore, for our research data, we used ARMA model to do  
47  
48 290 forecast analysis, finally, we established AR((1,2,8)) model of the Box-Jenkins  
49  
50 291 method, it has a good performance to fit and predict the TB incidence of Kashgar in  
51  
52 292 Xinjiang. From Figure 3, we can also see that the time series of TB incidence has  
53  
54 293 strong non-linear, the established AR((1,2,8)) model mainly extracted the linear  
55  
56 294 information of data, considering that the neural network can capture the non-linear  
57  
58 295 information of data well, in order to improve the prediction accuracy of TB incidence  
59  
60 296 rate in Kashgar, we used AR((1,2,8)) model and Elman neural network model to  
297 establish AR-Elman hybrid model. Many studies have found that the combination  
298 model can improve the accuracy of prediction, such as, Wang et al.<sup>28</sup> found that  
299 SARIMA-NAR hybrid model has an outstanding ability to improve the prediction  
300 accuracy relative to SARIMA model and nonlinear autoregressive network (NAR)

1  
2  
3  
4 301 model when they were used to predict pertussis incidence in China. Li et al.<sup>27</sup> found  
5 302 ARIMA-GRNN hybrid model was shown to be superior to the single ARIMA model  
6  
7 303 in predicting the short-term TB incidence in the Chinese population. Our research was  
8  
9 304 consistent with these literatures that our AR-Elman hybrid model was more accurate  
10 305 than the single AR((1,2,8)) model.

11  
12 306 In the past few years, Xinjiang's economic development was relatively backward,  
13  
14 307 medical resources were scarce, diagnosis and treatment were delayed, the continuous  
15 308 spread of TB has become a difficult problem in the control of TB in Xinjiang. In  
16  
17 309 recent years, Xinjiang has introduced many new policies to increase investment in TB  
18  
19 310 prevention and control, and the relevant departments of disease prevention and control  
20  
21 311 in Xinjiang have also done a lot of effective work, which has helped to control  
22 312 effectively the rapid increase of the TB incidence in Xinjiang. In order to do a good  
23  
24 313 job in the prevention and control of TB in Xinjiang, many departments need to make  
25  
26 314 joint efforts. Our research was mainly to build a high-precision prediction model to  
27 315 help early warning and prediction analysis of tuberculosis in Kashgar. Finally, we  
28  
29 316 established the AR-Elman hybrid model, which had high fitting and prediction  
30  
31 317 accuracy of TB incidence in Kashgar, Xinjiang.

32  
33 318 Our study found that Box-Jenkins and Elman neural network hybrid method was  
34  
35 319 an effective method for predicting the incidence of TB in Kashgar, it could provide a  
36  
37 320 scientific reference for prediction analysis of TB incidence. However, our study also  
38  
39 321 has some limitations: our method is only suitable for short-term prediction, long-term  
40  
41 322 prediction performance will decline, two main reasons: first, our model was based on  
42  
43 323 historical data characteristics; second, climatic factors, environmental factors,  
44  
45 324 demographic factors and political issues may have certain impacts on the change of  
46  
47 325 incidence. Therefore, if the established model becomes old and people want to obtain  
48  
49 326 more accurate prediction results, it will be needed to adjust the model parameters,  
50  
51 327 update the model based on the new modeling sample data, and then to do prediction  
52  
53 328 analysis.

## 50 329 **Conclusions**

51  
52 330 Kashgar has a very high TB incidence, in order to provide some help for the  
53  
54 331 prevention and control of this disease, the prediction problem of the TB incidence was  
55  
56 332 studied. Firstly, a single AR((1,2,8)) prediction model was established by using  
57  
58 333 Box-Jenkins method, and its fitting and prediction performance were good, secondly,  
59  
60 334 in order to improve the prediction accuracy of the single AR((1,2,8)) model, we used

1  
2  
3  
4 335 single AR((1,2,8)) and Elman neural network with strong ability to capture nonlinear  
5 336 information to establish AR-Elman hybrid model. The fitting and prediction accuracy  
6  
7 337 of the hybrid model was higher than that of the single AR((1,2,8)) model. The  
8  
9 338 AR-Elman hybrid model can provide scientific reference for predicting and warning  
10  
11 339 the TB incidence in Kashgar, Xinjiang. This study also has some limitations,  
12  
13 340 long-term prediction accuracy of the AR-Elman hybrid model will decline, after the  
14  
15 341 model becomes old, it will be needed to adjust the model parameters and establish  
16  
17 342 new Box-Jenkins and Elman neural network hybrid model to do prediction analysis  
18  
19 343 based on new sample data.

### 344 **Competing interests**

345 The authors declare no conflict of interest.

### 346 **Funding**

347 This work was supported by Major projects of science and technology in  
348 Xinjiang Autonomous region (Grant No.2017A03006), China, and National Natural  
349 Science Foundation Project of China (Grant No. 72064036, 82060609),and State Key  
350 Laboratory of Pathogenesis, Prevention and Treatment of High Incidence Diseases in  
351 Central Asia Fund (Grant No. SKL-HIDCA-2020-9)

### 352 **Data sharing statement**

353 No additional data are available.

### 354 **Author contributions**

355 YLZ and XLZ analyzed the data and wrote the manuscript. XLZ, XJW, KW and  
356 YC wrote and revised the manuscript. All authors read and approved the final  
357 manuscript.

### 358 **Acknowledgements**

359 We would like to express our gratitude to anonymous peer reviewers for  
360 carefully revising our manuscript and for his or her useful comments.

### 361 **References**

- 362 1.Kemal J, Sibhat B, Abraham A, et al. Bovine tuberculosis in eastern Ethiopia:  
363 prevalence, risk factors and its public health importance. BMC Infectious Diseases,  
364 2019; 19(1).
- 365 2. Tilahun M, Ameni G, Desta K, et al. Molecular epidemiology and drug sensitivity  
366 pattern of Mycobacterium tuberculosis strains isolated from pulmonary  
367 tuberculosis patients in and around Ambo Town, Central Ethiopia. Plos One, 2018;

- 1  
2  
3  
4 368 13(2):e0193083-.
- 5  
6 369 3. Reta A, Simachew A. The Role of Private Health Sector for Tuberculosis Control  
7  
8 370 in Debre Markos Town, Northwest Ethiopia. *Advances in Medicine*,  
9  
10 371 2018;2018(2):1-8.
- 11  
12 372 4. WHO. Global tuberculosis report 2019, [https://www.who.int/tb/publications/  
13  
14 373 global\\_report/en/](https://www.who.int/tb/publications/global_report/en/). (Accessed on 17 Oct 2019).
- 15  
16 374 5. Zhao YF, Shou MH, Wang ZX. Prediction of the Number of Patients Infected with  
17  
18 375 COVID-19 Based on Rolling Grey Verhulst Models. *Int J Environ Res Public  
19  
20 376 Health*. 2020; 17(12):4582.
- 21  
22 377 6. Guan P, Wu W, Huang D. Trends of reported human brucellosis cases in mainland  
23  
24 378 China from 2007 to 2017: an exponential smoothing time series analysis. *Environ  
25  
26 379 Health Prev Med*. 2018; 23(1):23.
- 27  
28 380 7. Zhang YQ, Li XX, Li WB, Jiang JG, Zhang GL, Zhuang Y, Xu JY, Shi J, Sun DY.  
29  
30 381 Analysis and predication of tuberculosis registration rates in Henan Province,  
31  
32 382 China: an exponential smoothing model study. *Infect Dis Poverty*. 2020;9(1):123.
- 33  
34 383 8. Martínez-Bello DA, López-Quílez A, Torres-Prieto A. Bayesian dynamic modeling  
35  
36 384 of time series of dengue disease case counts. *PLoS Negl Trop Dis*.  
37  
38 385 2017;11(7):e0005696.
- 39  
40 386 9. Wang Y, Xu C, Zhang S, Wang Z, Zhu Y, Yuan J. Temporal trends analysis of  
41  
42 387 human brucellosis incidence in mainland China from 2004 to 2018. *Sci Rep*.  
43  
44 388 2018;8(1):15901.
- 45  
46 389 10. Wang Y, Xu C, Li Y, Wu W, Gui L, Ren J, Yao S. An Advanced Data-Driven  
47  
48 390 Hybrid Model of SARIMA-NNNAR for Tuberculosis Incidence Time Series  
49  
50 391 Forecasting in Qinghai Province, China. *Infect Drug Resist*. 2020;13:867-880.
- 51  
52 392 11. Aryee, Kwarteng , Essuman, Nkansa Agyei, et al. Estimating the incidence of  
53  
54 393 tuberculosis cases reported at a tertiary hospital in Ghana: a time series model  
55  
56 394 approach. *BMC Public Health*.2018;18(1):1292.
- 57  
58 395 12. Tohidinik H R , Moheballi M , Mansournia M A, et al. Forecasting zoonotic  
59  
60 396 cutaneous leishmaniasis using meteorological factors in eastern Fars province, Iran:  
397 A SARIMA Analysis. *Tropical Medicine & International Health*,

- 1  
2  
3  
4 398 2018;23(8):860–869.
- 5  
6 399 13. Ouedraogo B, Inoue Y, Kambiré A, et al. Spatio-temporal dynamic of malaria in  
7  
8 400 Ouagadougou, Burkina Faso, 2011–2015. *Malaria Journal*, 2018;17(1):138.
- 9  
10 401 14. Wagenaar B H, Augusto O, Beste J, et al. The 2014–2015 Ebola virus disease  
11  
12 402 outbreak and primary healthcare delivery in Liberia: Time-series analyses for  
13  
14 403 2010–2016. *Plos Medicine*, 2018; 15(2):e1002508.
- 15  
16 404 15. Liu S, Chen J, Wang J, et al. Predicting the outbreak of hand, foot, and mouth  
17  
18 405 disease in Nanjing, China: a time-series model based on weather variability.  
19  
20 406 *International Journal of Biometeorology*, 2017;(6):1-10.
- 21  
22 407 16. Anokye R, Acheampong E, Owusu I, et al. Time series analysis of malaria in  
23  
24 408 Kumasi: Using ARIMA models to forecast future incidence. *Cogent Social*  
25  
26 409 *Sciences*, 2018; 4(1):1461544.
- 27  
28 410 17. Wang Y W , Shen Z Z , Jiang Y . Comparison of autoregressive integrated moving  
29  
30 411 average model and generalised regression neural network model for prediction of  
31  
32 412 haemorrhagic fever with renal syndrome in China: a time-series study. *BMJ Open*,  
33  
34 413 2019; 9(6):e025773.
- 35  
36 414 18. Guo W L , Geng J , Zhan Y , et al. Forecasting and predicting intussusception in  
37  
38 415 children younger than 48 months in Suzhou using a seasonal autoregressive  
39  
40 416 integrated moving average model. *BMJ Open*, 2019; 9(1).
- 41  
42 417 19. Gabriel A F B , Alencar A P , Miraglia S G E K . Dengue outbreaks: unpredictable  
43  
44 418 incidence time series. *Epidemiology & Infection*, 2019; 147.
- 45  
46 419 20. Tian C W , Wang H , Luo X M . Time-series modelling and forecasting of hand,  
47  
48 420 foot and mouth disease cases in China from 2008 to 2018. *Epidemiology &*  
49  
50 421 *Infection*, 2019; 147.
- 51  
52 422 21. Juang W C , Huang S J , Huang F D , et al. Application of time series analysis in  
53  
54 423 modelling and forecasting emergency department visits in a medical centre in  
55  
56 424 Southern Taiwan. *Bmj Open*, 2017; 7(11):e018628.
- 57  
58 425 22. Yu C, Li Y, Zhang M. An improved Wavelet Transform using Singular Spectrum  
59  
60 426 Analysis for wind speed forecasting based on Elman Neural Network. *Energy*  
427 *Conversion & Management*, 2017; 148:895-904.

- 1  
2  
3  
4 428 23. Huang Y, Shen L. Elman Neural Network Optimized by Firefly Algorithm for  
5 429 Forecasting China's Carbon Dioxide Emissions. *Communications in Computer*  
6 and Information Science, 2018;(951): 36-47.  
7  
8 430  
9 431 24. Alkhasawneh M S. Hybrid Cascade Forward Neural Network with Elman Neural  
10 432 Network for Disease Prediction. *Arabian Journal for Science and Engineering*,  
11 433 2019;44(11): 9209–9220.  
12  
13 434 25. Mehrgini B, Izadi H, Memarian H. Shear wave velocity prediction using Elman  
14 435 artificial neural network. *Carbonates & Evaporites*, 2017;(6):1-11.  
15  
16 436 26. Khalaf M, Hussain A J, Keight R, et al. Machine learning approaches to the  
17 437 application of disease modifying therapy for sickle cell using classification  
18 438 models. *Neurocomputing*, 2017; 228(C):154-164.  
19  
20 439 27. Li Z, Wang Z, Song H, Liu Q, He B, Shi P, Ji Y, Xu D, Wang J. Application of a  
21 440 hybrid model in predicting the incidence of tuberculosis in a Chinese population.  
22 441 *Infect Drug Resist*. 2019;12:1011-1020.  
23  
24 442 28. Wang Y, Xu C, Wang Z, Zhang S, Zhu Y, Yuan J. Time series modeling of  
25 443 pertussis incidence in China from 2004 to 2018 with a novel wavelet based  
26 444 SARIMA-NAR hybrid model. *PLoS One*. 2018;13(12):e0208404.  
27  
28 445 29. Wang Y, Xu C, Zhang S, Wang Z, Yang L, Zhu Y, Yuan J. Temporal trends  
29 446 analysis of tuberculosis morbidity in mainland China from 1997 to 2025 using a  
30 447 new SARIMA-NARNNX hybrid model. *BMJ Open*. 2019;9(7):e024409.  
31  
32 448 30. Box G E, Jenkins G M. *Time series analysis: forecasting and control* rev. ed.  
33 449 Oakland, California, Holden-Day, 1976; 31(4):238-242.  
34  
35 450 31. Ming Cheng. *The principle and example of MATLAB neural network*. Tsinghua  
36 451 University Press, 2013.  
37  
38 452 32. Huppert A, Katriel G. Mathematical modelling and prediction in infectious  
39 453 disease epidemiology. *Clin Microbiol Infect*. 2013;19(11):999-1005  
40  
41 454 33. Wearing HJ1, Rohani P, Keeling MJ. Appropriate models for the management of  
42 455 infectious diseases. *PLoS Med*. 2005; 2(7):e174.  
43  
44 456 34. Neuberger A, Paul M, Nizar A, Raoult D. *Modelling in infectious diseases*:  
45  
46  
47  
48  
49  
50  
51  
52  
53  
54  
55  
56  
57  
58  
59  
60

1  
2  
3  
4 457 between haphazard and hazard. Clin Microbiol Infect. 2013;19(11):993-8.  
5  
6 458 35. Tipirneni-Sajja A, Krafft AJ, Loeffler RB, Song R, Bahrami A, Hankins JS,  
7  
8 459 Hillenbrand CM. Autoregressive moving average modeling for hepatic iron  
9  
10 460 quantification in the presence of fat. J Magn Reson Imaging.  
11  
12 461 2019;50(5):1620-1632.

13  
14 462

## 16 463 **Figures**

17  
18 464 **Figure 1.** The red part of this picture is the location of kashgar in Xinjiang, China.  
19  
20 465 Kashgar is located in the south of Xinjiang, and it has a very high incidence of  
21  
22 466 tuberculosis.

23  
24  
25 467

26 468 **Figure 2.** The Structure diagram of Elman neural network.  $w^1$ ,  $w^2$  and  $w^3$  are the  
27  
28 469 connection weight matrixes.  $x_c(k)$  and  $x(k)$  represent the output of the contact unit and  
29  
30 470 the hidden layer unit, respectively,  $y(k)$  represents the output of the output unit,  $u(k-1)$   
31  
32 471 represents the input of the input unit.

33  
34  
35 472

36 473 **Figure 3.** Graph of the tuberculosis (TB) incidence in Kashgar from January 2005 to  
37  
38 474 December 2017. The curve of TB incidence showed strong nonlinear characteristics  
39  
40 475 from 2005 to 2014, and the TB incidence increased significantly from 2015 to 2017.

41  
42  
43 476

44 477 **Figure 4.** Autocorrelation function (ACF) and partial autocorrelation function (PACF)  
45  
46 478 graphs of modeling data. As the delay of the lag order, the autocorrelation coefficients  
47  
48 479 were trailing and the partial correlation coefficients were truncated, so it was suitable  
49  
50 480 to establish the AR model.

51  
52  
53 481

54 482 **Figure 5.** Autocorrelation function (ACF) and partial autocorrelation function (PACF)  
55  
56 483 graphs of residuals of AR((1,2,8)) model. Autocorrelation coefficients and partial  
57  
58 484 correlation coefficients were almost in 95% confidence interval, so AR ((1,2,8))  
59  
60 485 model could extract the information of original data well.

1  
2  
3  
4 486

5 487 **Figure 6.** The numbers of neurons in AR-Elman model and the corresponding root  
6  
7 488 mean square error (RMSE). When the number of neuron was 6, the RMSE was the  
8  
9 489 smallest, and the AR-Elman model fitting ability was the strongest.

10  
11 490

12  
13 491 **Figure 7.** The fitting curves of AR((1,2,8)) model and AR-Elman model, and the  
14  
15 492 prediction curve of AR-Elman model. Red line stands for the original tuberculosis  
16  
17 493 (TB) incidence curve, green line stands for AR((1,2,8)) model fitting curve, blue line  
18  
19 494 stands for AR-Elman model fitting curve. Blue dotted line stands for prediction curve  
20  
21 495 of AR-Elman model, black dotted line stands for predicted curve of confidence  
22  
23 496 intervals. The fitting ability of AR-Elman hybrid model was slightly better than that  
24  
25 497 of the single AR((1,2,8)).

26  
27 498

28  
29  
30 499

31  
32  
33 500

34  
35 501

36  
37 502

38  
39 503

40  
41 504

42  
43 505

44  
45  
46  
47  
48 506 **Tables**

49  
50 507 **Table 1.** The Augmented Dickey-Fuller (ADF) test of the training data

|                                        | t-Statistics | p-value |
|----------------------------------------|--------------|---------|
| Augmented Dickey-Fuller test statistic | -3.47        | 0.01    |
| Test critical values: 1% level         | -3.48        |         |
| 5% level                               | -2.88        |         |



10% level

-2.58

508

509

510 **Table 2.** Parameter estimates of the tentative models with their Akaike information  
 511 criterion (AIC) and Schwarz criterion (SC) values.

| Models        | Variables | Coefficients | Std. Errors | t    | p-values | AIC  | SC   |
|---------------|-----------|--------------|-------------|------|----------|------|------|
| AR (2)        | C         | 21.42        | 2.17        | 9.86 | <0.01    | 6.55 | 6.62 |
|               | AR(1)     | 0.42         | 0.08        | 5.20 | <0.01    |      |      |
|               | AR(2)     | 0.34         | 0.08        | 4.17 | <0.01    |      |      |
| AR((1, 2, 7)) | C         | 22.93        | 3.73        | 6.14 | <0.00    | 6.53 | 6.62 |
|               | AR(1)     | 0.41         | 0.08        | 5.10 | <0.00    |      |      |
|               | AR(2)     | 0.32         | 0.08        | 3.88 | <0.00    |      |      |
|               | AR (7)    | 0.12         | 0.007       | 1.74 | 0.08     |      |      |
| AR((1, 2, 8)) | C         | 23.53        | 4.56        | 5.16 | <0.01    | 6.53 | 6.61 |
|               | AR(1)     | 0.40         | 0.08        | 4.84 | <0.01    |      |      |
|               | AR(2)     | 0.32         | 0.08        | 3.96 | <0.01    |      |      |
|               | AR (8)    | 0.15         | 0.07        | 2.17 | 0.03     |      |      |
| AR((1, 2, 9)) | C         | 29.07        | 15.53       | 1.87 | 0.06     | 6.46 | 6.55 |
|               | AR(1)     | 0.37         | 0.08        | 4.64 | <0.01    |      |      |
|               | AR (2)    | 0.31         | 0.08        | 3.93 | <0.01    |      |      |
|               | AR (9)    | 0.26         | 0.07        | 3.80 | <0.01    |      |      |

512

513 **Table 3.** Comparison results of in-sample fitting and out-of-sample forecasting  
 514 performance for the AR((1,2,8)) model and AR-Elman model.

| Models      | Fitted efficacy |      |        | Models      | Forecasted efficacy |      |        |
|-------------|-----------------|------|--------|-------------|---------------------|------|--------|
|             | RMSE            | MAE  | MAPE   |             | RMSE                | MAE  | MAPE   |
| AR((1,2,8)) | 6.15            | 4.33 | 0.2585 | AR((1,2,8)) | 10.88               | 8.75 | 0.2029 |
| AR-Elman    | 3.78            | 3.38 | 0.1837 | AR-Elman    | 8.86                | 7.29 | 0.2006 |

515

1  
2  
3  
4  
5  
6  
7  
8  
9  
10  
11  
12  
13  
14  
15  
16  
17  
18  
19  
20  
21  
22  
23  
24  
25  
26  
27  
28  
29  
30  
31  
32  
33  
34  
35  
36  
37  
38  
39  
40  
41  
42  
43  
44  
45  
46  
47  
48  
49  
50  
51  
52  
53  
54  
55  
56  
57  
58  
59  
60

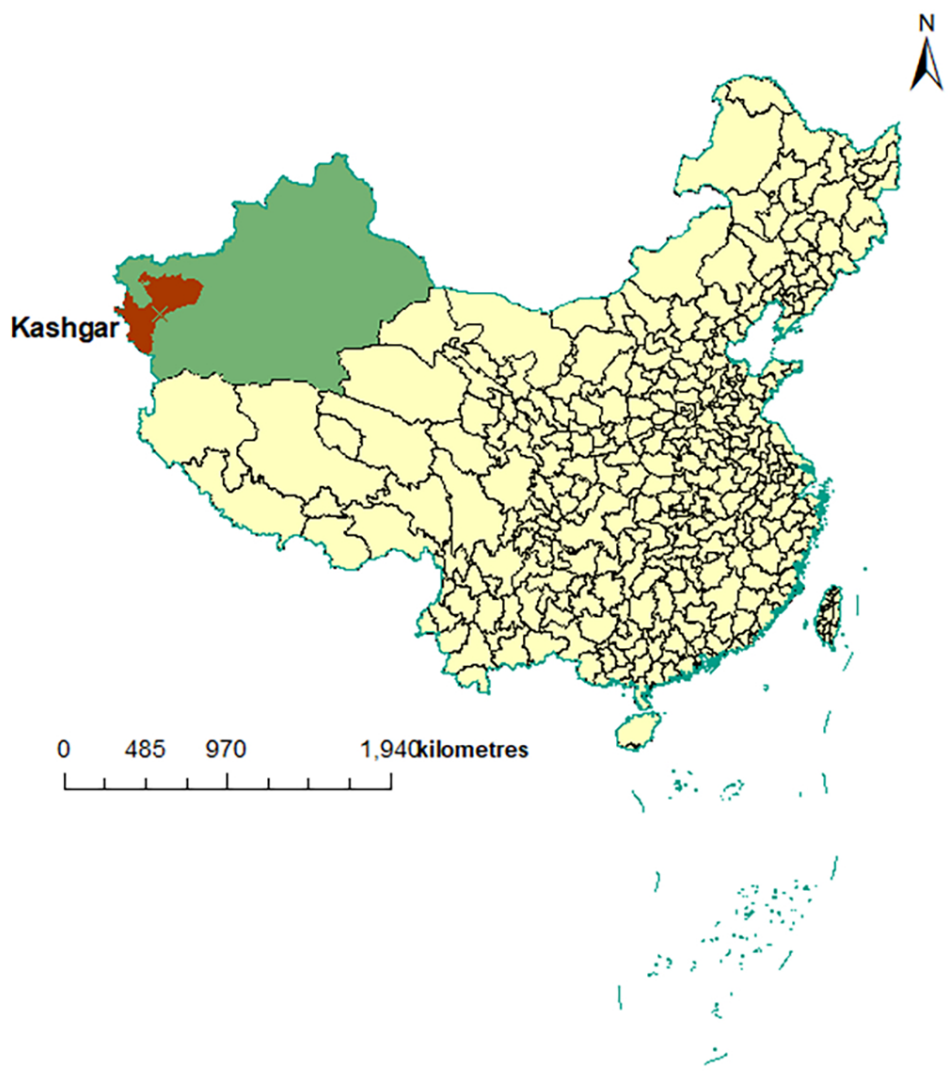

Figure 1

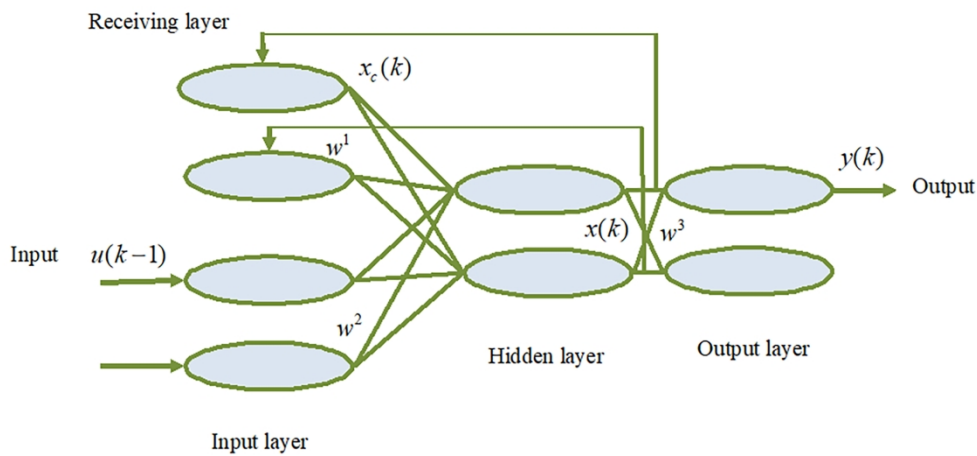

Figure 2

1  
2  
3  
4  
5  
6  
7  
8  
9  
10  
11  
12  
13  
14  
15  
16  
17  
18  
19  
20  
21  
22  
23  
24  
25  
26  
27  
28  
29  
30  
31  
32  
33  
34  
35  
36  
37  
38  
39  
40  
41  
42  
43  
44  
45  
46  
47  
48  
49  
50  
51  
52  
53  
54  
55  
56  
57  
58  
59  
60

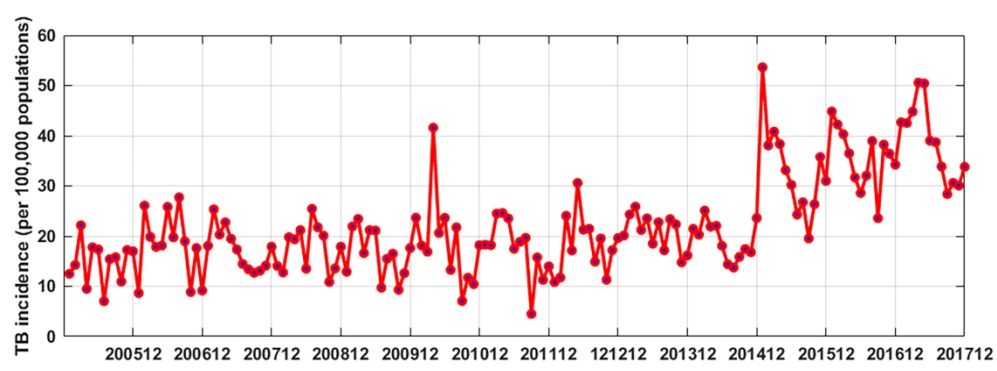

Figure 3

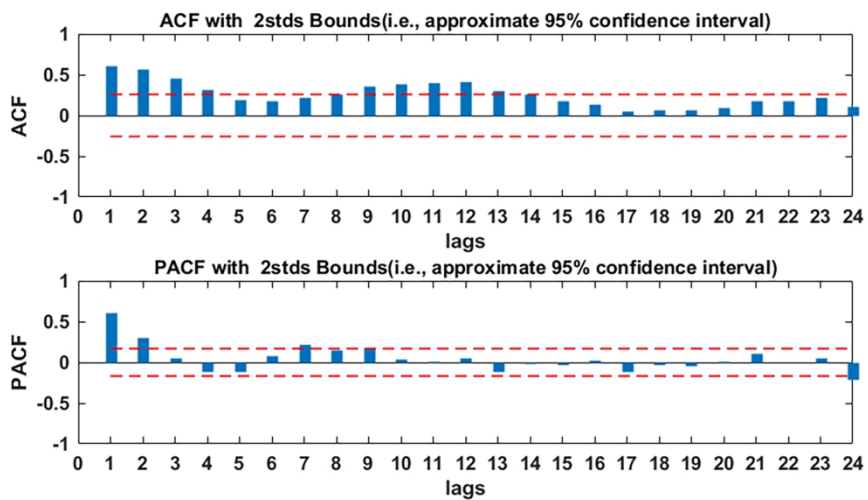

Figure 4

1  
2  
3  
4  
5  
6  
7  
8  
9  
10  
11  
12  
13  
14  
15  
16  
17  
18  
19  
20  
21  
22  
23  
24  
25  
26  
27  
28  
29  
30  
31  
32  
33  
34  
35  
36  
37  
38  
39  
40  
41  
42  
43  
44  
45  
46  
47  
48  
49  
50  
51  
52  
53  
54  
55  
56  
57  
58  
59  
60

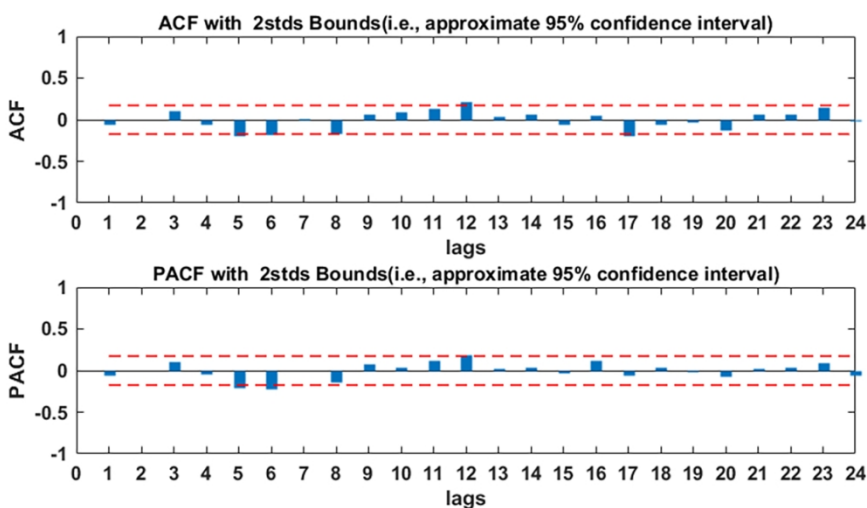

Figure 5

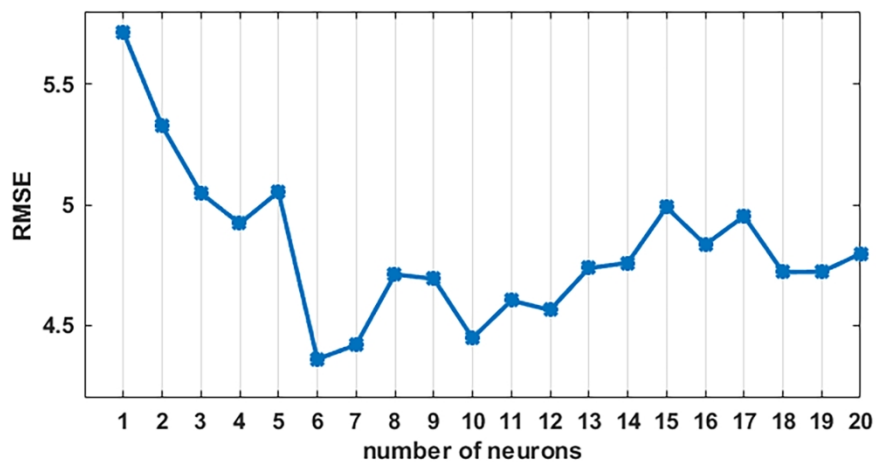

Figure 6

1  
2  
3  
4  
5  
6  
7  
8  
9  
10  
11  
12  
13  
14  
15  
16  
17  
18  
19  
20  
21  
22  
23  
24  
25  
26  
27  
28  
29  
30  
31  
32  
33  
34  
35  
36  
37  
38  
39  
40  
41  
42  
43  
44  
45  
46  
47  
48  
49  
50  
51  
52  
53  
54  
55  
56  
57  
58  
59  
60

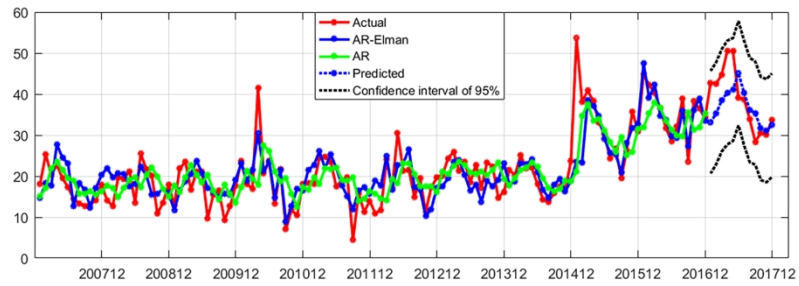

Figure 7



# BMJ Open

## Predictive study of tuberculosis incidence by time series method and Elman neural network in Kashgar, China

|                                 |                                                                                                                                                                                                                                                                                                                                                                                                                                                                                                                                                                                                                                                                                                                                                                                                                                                                                                                                                                                                                                       |
|---------------------------------|---------------------------------------------------------------------------------------------------------------------------------------------------------------------------------------------------------------------------------------------------------------------------------------------------------------------------------------------------------------------------------------------------------------------------------------------------------------------------------------------------------------------------------------------------------------------------------------------------------------------------------------------------------------------------------------------------------------------------------------------------------------------------------------------------------------------------------------------------------------------------------------------------------------------------------------------------------------------------------------------------------------------------------------|
| Journal:                        | <i>BMJ Open</i>                                                                                                                                                                                                                                                                                                                                                                                                                                                                                                                                                                                                                                                                                                                                                                                                                                                                                                                                                                                                                       |
| Manuscript ID                   | bmjopen-2020-041040.R3                                                                                                                                                                                                                                                                                                                                                                                                                                                                                                                                                                                                                                                                                                                                                                                                                                                                                                                                                                                                                |
| Article Type:                   | Original research                                                                                                                                                                                                                                                                                                                                                                                                                                                                                                                                                                                                                                                                                                                                                                                                                                                                                                                                                                                                                     |
| Date Submitted by the Author:   | 07-Dec-2020                                                                                                                                                                                                                                                                                                                                                                                                                                                                                                                                                                                                                                                                                                                                                                                                                                                                                                                                                                                                                           |
| Complete List of Authors:       | Zheng, Yanling; State Key Laboratory of Pathogenesis, Prevention and Treatment of High Incidence Diseases in Central Asia, College of Medical Engineering and Technology, Xinjiang Medical University, Urumqi 830054, People's Republic of China<br>Zhang, Xueliang; State Key Laboratory of Pathogenesis, Prevention and Treatment of High Incidence Diseases in Central Asia, College of Medical Engineering and Technology, Xinjiang Medical University, Urumqi 830054, People's Republic of China<br>Wang, Xijiang; Center for Disease Control and Prevention of Xinjiang Uygur Autonomous Region, Urumqi 830001, People's Republic of China<br>Wang, Kai; State Key Laboratory of Pathogenesis, Prevention and Treatment of High Incidence Diseases in Central Asia, College of Medical Engineering and Technology, Xinjiang Medical University, Urumqi 830054, People's Republic of China<br>Cui, Yan; Center for Disease Control and Prevention of Xinjiang Uygur Autonomous Region, Urumqi 830001, People's Republic of China |
| <b>Primary Subject Heading</b>: | Health services research                                                                                                                                                                                                                                                                                                                                                                                                                                                                                                                                                                                                                                                                                                                                                                                                                                                                                                                                                                                                              |
| Secondary Subject Heading:      | Health services research, Infectious diseases                                                                                                                                                                                                                                                                                                                                                                                                                                                                                                                                                                                                                                                                                                                                                                                                                                                                                                                                                                                         |
| Keywords:                       | International health services < HEALTH SERVICES ADMINISTRATION & MANAGEMENT, Tuberculosis < INFECTIOUS DISEASES, STATISTICS & RESEARCH METHODS                                                                                                                                                                                                                                                                                                                                                                                                                                                                                                                                                                                                                                                                                                                                                                                                                                                                                        |
|                                 |                                                                                                                                                                                                                                                                                                                                                                                                                                                                                                                                                                                                                                                                                                                                                                                                                                                                                                                                                                                                                                       |

SCHOLARONE™  
Manuscripts



I, the Submitting Author has the right to grant and does grant on behalf of all authors of the Work (as defined in the below author licence), an exclusive licence and/or a non-exclusive licence for contributions from authors who are: i) UK Crown employees; ii) where BMJ has agreed a CC-BY licence shall apply, and/or iii) in accordance with the terms applicable for US Federal Government officers or employees acting as part of their official duties; on a worldwide, perpetual, irrevocable, royalty-free basis to BMJ Publishing Group Ltd ("BMJ") its licensees and where the relevant Journal is co-owned by BMJ to the co-owners of the Journal, to publish the Work in this journal and any other BMJ products and to exploit all rights, as set out in our [licence](#).

The Submitting Author accepts and understands that any supply made under these terms is made by BMJ to the Submitting Author unless you are acting as an employee on behalf of your employer or a postgraduate student of an affiliated institution which is paying any applicable article publishing charge ("APC") for Open Access articles. Where the Submitting Author wishes to make the Work available on an Open Access basis (and intends to pay the relevant APC), the terms of reuse of such Open Access shall be governed by a Creative Commons licence – details of these licences and which [Creative Commons](#) licence will apply to this Work are set out in our licence referred to above.

Other than as permitted in any relevant BMJ Author's Self Archiving Policies, I confirm this Work has not been accepted for publication elsewhere, is not being considered for publication elsewhere and does not duplicate material already published. I confirm all authors consent to publication of this Work and authorise the granting of this licence.

1  
2  
3  
4 Predictive study of tuberculosis incidence by time series method  
5  
6  
7 and Elman neural network in Kashgar, China

8 **Yanling Zheng<sup>1</sup>, XueLiang Zhang<sup>1\*</sup>, XiJiang Wang<sup>2</sup>, Kai Wang<sup>1</sup>, Yan Cui<sup>2\*</sup>**

- 9  
10  
11 1. State Key Laboratory of Pathogenesis, Prevention and Treatment of High Incidence  
12 Diseases in Central Asia, College of Medical Engineering and Technology,  
13 Xinjiang Medical University, Urumqi 830054, People's Republic of China  
14  
15  
16 2. Center for Disease Control and Prevention of Xinjiang Uygur Autonomous Region,  
17 Urumqi 830001, People's Republic of China  
18  
19  
20  
21  
22  
23  
24  
25  
26  
27  
28  
29  
30  
31  
32  
33  
34  
35  
36  
37  
38  
39  
40  
41  
42  
43  
44  
45  
46  
47  
48  
49  
50  
51  
52  
53  
54  
55  
56  
57

---

58  
59 **Xueliang Zhang** : \* Corresponding author, zhengyl\_math@sina.cn  
60 **Yan Cui** : \* Corresponding author, cuiyan\_jk@sina.com

## 1 Abstract

2 **Objective:** The incidence of tuberculosis (TB) in Kashgar, China, is very high, so the  
3 prevention and control of TB is arduous. However, there is little quantitative  
4 prediction study on the TB incidence, therefore, it is urgent to do prediction analysis  
5 of TB incidence in Kashgar, which can provide scientific reference for the prevention  
6 and control of TB.

7 **Methods:** Based on the monthly TB incidence, a single Box-Jenkins method and a  
8 Box-Jenkins and Elman neural network (ElmanNN) hybrid method were used to do  
9 prediction analysis of TB incidence in Kashgar. Root mean square error (RMSE),  
10 mean absolute error (MAE) and mean absolute percentage error (MAPE) were used to  
11 measure the prediction accuracy.

12 **Results:** After careful analysis, the single AR((1,2,8)) model and  
13 AR((1,2,8))-ElmanNN (AR-Elman) hybrid model were established, and the optimal  
14 neurons value of the AR-Elman hybrid model was 6. For the fitting dataset, the  
15 RMSE, MAE and MAPE were 6.15, 4.33 and 0.2858, respectively, for the AR((1,2,8))  
16 model, and 3.78, 3.38 and 0.1837, respectively, for the AR-Elman hybrid model. For  
17 the forecasting dataset, the RMSE, MAE and MAPE were 10.88, 8.75 and 0.2029,  
18 respectively, for the AR((1,2,8)) model, and 8.86, 7.29 and 0.2006, respectively, for  
19 the AR-Elman hybrid model.

20 **Conclusions:** Both the single AR((1,2,8)) model and AR-Elman model could be used  
21 to predict the TB incidence in Kashgar, but the modeling and validation  
22 scale-dependent measures (RMSE, MAE and MAPE) in the AR((1,2,8)) model were  
23 inferior to those in the AR-Elman hybrid model, which indicated that AR-Elman  
24 hybrid model was better than AR((1,2,8)) model. The Box-Jenkins and Elman neural  
25 network hybrid method can be highlighted in predicting the temporal trends of TB  
26 incidence in Kashgar, which may act as the potential for far-reaching implications for  
27 prevention and control of TB.

28 **Keywords:** Tuberculosis; Prediction; Box-Jenkins method; Elman neural network

29

### 30 **Strengths and limitations of this study:**

- 31 1. The incidence of tuberculosis (TB) is very high in Kashgar, therefore, it is urgent to  
32 do the prediction analysis of TB.
- 33 2. In the study, AR-Elman model with high prediction accuracy was established, it  
34 can be used to predict the development of TB in Kashgar, China.
- 35 3. The long-term prediction accuracy of AR-Elman hybrid model will decline.

### 36 **Introduction**

37 Tuberculosis (TB) is still a major global public health problem and the ninth  
38 leading cause of death in the world.<sup>1-3</sup> Because TB is contagious, patient resistance is  
39 low, treatment time is long, patients' labor force is lost and their contribution to  
40 society is reduced, so TB brings great burden to society and economy. All countries in  
41 the world are working hard to fight tuberculosis. In 2018, the number of new reported  
42 TB cases was about 10 million; this figure has remained relatively stable in recent  
43 years. The latest treatment results showed that the global TB treatment success rate  
44 was 83%. World Health Organization (WHO) has set targets for the stop TB strategy.  
45 The targets mentioned that by 2030, on the basis of the work in 2015, TB deaths will  
46 reduce by 90%, and annual new TB cases will reduce by 80%.<sup>4</sup> In order to achieve  
47 these goals, TB prevention and control services must be provided in the broad context  
48 of universal health coverage, joint action must be taken to address the social and  
49 economic consequences of TB, and technological breakthroughs should be achieved  
50 by 2025 to make the TB incidence decline faster than that at any time in history.  
51 According to the global tuberculosis report 2019<sup>4</sup>, China has the second highest  
52 number of TB cases in the world.<sup>4</sup> The TB incidence in western China was much  
53 higher than that in eastern and central China. From 2016 to 2017, the annual TB  
54 incidence in Xinjiang was 185.66/100,000 and 202.58/100,000, while the annual TB  
55 incidence from 2016 to 2017 in China was 61/100,000 and 60.53/100,000,  
56 respectively, it is nearly three times higher in Xinjiang than that national level.

57 There are 14 Prefectural-Level cities in Xinjiang, China, among which Kashgar  
58 has a very high TB incidence rate. From 2016 to 2017, the annual TB incidences in  
59 Kashgar were 427.44/100,000 and 465.33/100,000, respectively, which were nearly 7

1  
2  
3  
4 60 times higher than that of the national level. Doing a good job in the prevention and  
5  
6 61 control of TB in Kashgar is an important link to reduce the TB incidence in Xinjiang.

7  
8 62 Mastering the changing law of the incidence of infectious diseases, using the  
9  
10 63 existing surveillance data to analyze, then, to predict the possible epidemic trend and  
11  
12 64 provide reference data for the prevention, can better control the occurrence and  
13  
14 65 epidemic of infectious diseases. Prediction of infectious diseases is to predict the  
15  
16 66 occurrence, development and epidemic trend of infectious diseases according to the  
17  
18 67 occurrence, development law and related factors of infectious diseases, based on  
19  
20 68 analysis, judgment and mathematical model, etc.

21  
22 69 For study of quantitative prediction of infectious diseases, there are many  
23  
24 70 methods, such as grey prediction method <sup>5</sup>, exponential smoothing prediction method  
25  
26 71 <sup>6,7</sup>, dynamic model prediction method <sup>8</sup>, Box-Jenkins method <sup>9</sup>, neural network  
27  
28 72 method <sup>10</sup>, etc., with the deepening of prediction research, more and more scholars  
29  
30 73 like to use the Box-Jenkins method <sup>11-21</sup>, there are many different models in this  
31  
32 74 method, and if appropriate models are established according to the characteristics of  
33  
34 75 time series, high prediction ability often can be obtained. Neural network has strong  
35  
36 76 nonlinear mapping ability, in which Elman neural network is composed of input layer,  
37  
38 77 hidden layer, connection layer and output layer. The Elman network has dynamic  
39  
40 78 memory function, and it is very suitable for time series prediction. At present, the  
41  
42 79 Elman network is widely used in various fields, and has achieved successful  
43  
44 80 prediction results. <sup>22-26</sup> Sometimes, the prediction effect of a single model is not ideal,  
45  
46 81 in order to further improve the prediction accuracy, many studies adopted combined  
47  
48 82 model prediction method <sup>27-29</sup>, the combined model can absorb the advantages of two  
49  
50 83 or more methods so as to achieve a higher prediction accuracy.

51  
52 84 The TB incidence of Kashgar is very high, and it is urgent to do a good job in the  
53  
54 85 prevention and control of TB in this area. Accurate prediction of TB incidence is a  
55  
56 86 prerequisite for prevention and control, which can help advance resource planning and  
57  
58 87 policy formulation. In this study, the popular Box-Jenkins time series method was  
59  
60 88 used to build model for predicting the TB incidence in Kashgar, in order to improve  
89 89 the prediction accuracy, the Elman neural network with strong nonlinear information

1  
2  
3  
4 90 capture ability was used to construct the combined model for prediction analysis.  
5

## 6 91 **Materials and Methods**

### 7 8 92 **Study area and data Sources**

9  
10 93 We selected Kashgar as the study site (see Figure 1). This area is located in the  
11  
12 94 south of Xinjiang province in China with an area of approximately 16.2 thousand  
13  
14 95 square kilometers and a permanent population of 4.64 million in 2018. TB case data  
15  
16 96 from January 2005 to December 2017 were obtained from the Center for Disease  
17  
18 97 Control and Prevention (CDC) of Xinjiang Uygur Autonomous Region, all TB cases  
19  
20 98 in Xinjiang must be reported to the CDC through the infectious disease surveillance  
21  
22 99 system within 24 hours. The TB cases datasets used need permission of the CDC.  
23  
24 100 Population data were obtained from the website of Xinjiang Bureau of Statistics  
25  
26 101 ([http://tjj.xinjiang.gov.cn/tjj/tjfw/list\\_tjfw.shtml](http://tjj.xinjiang.gov.cn/tjj/tjfw/list_tjfw.shtml)). Based on the population data and  
27  
28 102 TB case data, we calculated the incidence data of TB.

### 29 30 103 **Patient and public involvement**

31  
32 104 Patients were not involved in the design of this study as it involved only  
33  
34 105 observational analysis of an anonymised, pre-existing, routinely collected dataset.

### 35 36 106 **Ethics approval**

37  
38 107 Since no primary data collection was undertaken, no patient or public was  
39  
40 108 involved, no formal ethical assessment or informed consent was required.

### 41 42 109 **Autoregressive moving average (ARMA) model**

43  
44 110 ARMA model<sup>30</sup> is an important time series analysis and prediction model in  
45  
46 111 Box-Jenkins method, also known as auto-regression moving average model. The  
47  
48 112 ARMA (p,q) model is a model with autocorrelation order p and moving average order  
49  
50 113 q, p and q are judged by autocorrelation function (ACF) and partial autocorrelation  
51  
52 114 function (PACF) diagram of stationary data. If the original data is stable, the  
53  
54 115 autocorrelation coefficients are trailing, and the partial correlation coefficients are the  
55  
56 116 p-order truncated, then  $q=0$ , the ARMA(p,q) model is recorded as AR(p), and its  
57  
58 117 expression is as follows:  
59  
60

$$X_t = c + \phi_1 X_{t-1} + \phi_2 X_{t-2} + \dots + \phi_p X_{t-p} + \varepsilon_t,$$

where,  $X_t$  is the observed value at  $t$ ,  $\phi_1, \dots, \phi_p$  are model parameters,  $c$  is a constant, if only  $\phi_1, \phi_2, \phi_p$  are not zeros, then, The AR(p) model becomes a sparse model, which can be recorded as AR((1,2,p)).

If the original data is stable, the autocorrelation coefficients are  $q$ -order truncated and the partial correlation coefficients are trailing, then  $p=0$  and the ARMA(p,q) model becomes MA(q), its expression is as follows:

$$X_t = \mu + \varepsilon_t + \theta_1 \varepsilon_{t-1} + \theta_2 \varepsilon_{t-2} + \dots + \theta_q \varepsilon_{t-q},$$

where,  $\mu$  is the expected value of  $X_t$ .  $\theta_1, \dots, \theta_p$  are model parameters.

If the original data is stable, the autocorrelation coefficients are trailing, and the partial correlation coefficients are also trailing, then the expression of the ARMA (p, q) model is as follows:

$$X_t = c + \phi_1 X_{t-1} + \phi_2 X_{t-2} + \dots + \phi_p X_{t-p} + \varepsilon_t - \theta_1 \varepsilon_{t-1} - \theta_2 \varepsilon_{t-2} - \dots - \theta_q \varepsilon_{t-q}.$$

There are four main steps in ARMA modeling:

First step. The prerequisite for ARMA modeling is the stationary of time series. Check whether the data is stable by Augmented Dickey-Fuller (ADF) unit root test. In this study, the significant level probability (p-value) is 0.05, and if the p-value is less than 0.05, then, the data is stable. By observing the autocorrelation function (ACF) and partial autocorrelation function (PACF) of the stable data, we can determine the possible values of  $p$  and  $q$  and establish the possible ARMA (p, q) model.

Second step. The parameters of ARMA(p, q) model are estimated by maximum likelihood estimation or least square estimation, and the model parameters are tested. If p-value is less than 0.05, the parameters have statistical significance. The best model is determined according to the value of Akaike information criterion (AIC), Schwarz criterion (SC) and Goodness of Fit ( $R^2$ ) of model. The smaller AIC and SC are, the larger the  $R^2$  is, and the better the model is.

Third step. To determine whether the established ARMA (p, q) model is suitable. The residual sequence of a suitable model shall be the white noise process, and its ACF and PACF coefficients should be within twice the standard deviation range, otherwise, it is considered that the extraction information of the established model is



148 not sufficient, and it is necessary to consider improving the accuracy of the model.

149 Fourth step. Using the established model to do prediction and analysis.

## 150 **Elman neural network model**

151 The Elman neural network (see Figure 2) is proposed by Elman in 1990<sup>31</sup>. The  
152 model is generally divided into four layers: input layer, hidden layer, receiving layer  
153 and output layer. The characteristic of Elman network is that the output of the hidden  
154 layer is connected to the input of the hidden layer through the delay and storage of the  
155 receiving layer, which makes it sensitive to the data of the historical state. The  
156 addition of the internal feedback network increases the ability of the network itself to  
157 deal with dynamic information, thus achieving the purpose of dynamic modeling.

158 The mathematical structure of the Elman neural network is as follows:

$$159 \quad x(k) = f(w^1 x_c(k) + w^2 u(k-1))$$

$$160 \quad x_c(k) = \alpha x_c(k-1) + x(k-1)$$

$$161 \quad y(k) = g(w^3 x(k))$$

162 Where,  $w^1$  is the connection weight matrix between the contact unit and the  
163 hidden layer unit,  $w^2$  is the connection weight matrix between the input unit and the  
164 hidden layer unit,  $w^3$  is the connection weight matrix between the hidden layer unit  
165 and the output unit.  $x_c(k)$  and  $x(k)$  represent the output of the contact unit and the  
166 hidden layer unit, respectively,  $y(k)$  represents the output of the output unit,  $\alpha$  is a  
167 self-connected feedback gain factor,  $0 \leq \alpha < 1$ ,  $f(x)$  often takes the sigmoid function.

168 There are four main steps in Elman neural network modeling:

169 First step. Data standardization processing. Data standardization is scaling the  
170 data to a small specific interval. In order to remove the unit limit of the data and  
171 convert it into dimensionless pure value, it is convenient for the index of different  
172 units or order of magnitude to be compared and weighted. In our study, we used  
173 function package `mapminmax()` to standardize the data, standardized data was in [-1,1]  
174 range.

175 Second step. Determine the input layer, the output layer. Generally, the input and  
176 output layer are determined according to the characteristics of data and the needs of  
177 the analysis.

178 Third step. Set the parameters of the Elman model, such as training epochs and  
179 goals, etc., in our study, training epochs and goals of Elman neural network were set

180 to 2000 and 0.00001, respectively. To determine the number of neurons in the hidden  
 181 layer, so that the error of the established Elman model is minimized. At present, there  
 182 is no ideal analytical expression for the number of neurons in the hidden layer. The  
 183 number of neurons has a great influence on the performance of the network. When the  
 184 number of neurons is too large, it will lead to that network learning time is too long,  
 185 generalization performances are not good, and even the convergence failure, but when  
 186 the number of neurons is too small, fault-tolerant ability of the network is poor. In  
 187 general, the number of neurons does not exceed 20.<sup>32</sup> In this study, matlab cyclic  
 188 structure was used to find the optimal number of neurons by comparing the RMSE  
 189 values of Elman networks with neurons 1 to 20.

190 Fourth step. According to the optimal number of neurons in the hidden layer, the  
 191 Elman model is constructed, and then the prediction and analysis can be made.

## 192 Model comparison measures

193 Three performance indexes, root mean square error (RMSE), mean absolute error  
 194 (MAE) and mean absolute percentage error (MAPE) were used to assess the fitting  
 195 and forecasting accuracy of two models. The smaller these three values are, the better  
 196 the model is. Their expressions are as follows<sup>10</sup>:

$$197 \quad RMSE = \sqrt{\frac{\sum_{t=1}^n (X_t - \hat{X}_t)^2}{n}},$$

$$198 \quad MAE = \frac{\sum_{t=1}^n |X_t - \hat{X}_t|}{n},$$

$$199 \quad MAPE = \frac{\sum_{t=1}^n \left| \frac{X_t - \hat{X}_t}{X_t} \right| \times 100}{n},$$

200 where,  $\hat{X}_t$  is the simulating and forecasting values,  $X_t$  is the actual values and  $n$  is the  
 201 number of observations.

## 202 Statistical software

203 All data analyses were conducted using Eviews7, matlab2015b, Arcmap10.1.

## 204 Results

205 From January 2005 to December 2017, the number of reported TB cases was  
 206 141984 in Kashgar, Xinjiang, the average annual TB cases were 7888 and the average  
 207 annual incidence was 191.18. Figure 3 showed the time series graph of the TB

1  
2  
3  
4 208 incidence. It can be seen from the Figure 3 that the curve of TB incidence showed  
5 209 strong nonlinear characteristics from 2005 to 2014, and the TB incidence from 2015  
6 210 to 2017 were significantly higher than that of previous years.

7  
8 211 The data of TB incidence from January 2005 to December 2017 were divided  
9 212 into two parts. The data from January 2005 to December 2016 were used to build  
10 213 model and the data from January 2017 to December 2017 were used to test the model.

#### 14 214 **Establishment of ARMA Model**

15  
16  
17 215 ARMA Modeling requires data stability, so, first of all, the stability of the  
18 216 modeling part of the data was verified by ADF test. The results of ADF test showed  
19 217 that p-value was less than 0.05(see Table 1), which indicated that the data was stable  
20 218 and could be directly used to build the model. Secondly, the ACF and PACF graphs  
21 219 of the modeling data were plotted (see Figure 4), it was obvious from Figure 4 that the  
22 220 autocorrelation coefficients were trailing distribution, and the partial correlation  
23 221 coefficients were almost a second-order truncated distribution, only at the lag 7, 8 and  
24 222 9, the correlation coefficients were a little large. Based on this situation, we  
25 223 considered establishing four models, such as AR(2), AR((1,2,7)), AR((1,2,8)) and  
26 224 AR((1,2,9)). The least square method was used to test the parameters of the four  
27 225 models. The results of the test were shown in Table 2; we can see that, of the four  
28 226 models, only AR (2) model and AR((1,2,8)) passed the parameter test. Comparing the  
29 227 two models, it was found that, the AR((1,2,8)) model had smaller AIC and SC values,  
30 228 and the  $R^2$  values of AR((1,2,8)) were larger than the  $R^2$  values of AR (2), so the AR  
31 229 (2) model was abandoned. Then, the residual analysis of the AR((1,2,8)) model was  
32 230 carried out, the autocorrelation and partial correlation coefficient of the residuals were  
33 231 almost all within two times standard deviation, and only in the lag 5,6,12, they were  
34 232 beyond the range of two times standard deviation (see Figure 5), which indicated that  
35 233 the AR((1,2,8)) model could be used to roughly predict the TB incidence in Kashgar.  
36 234 We used AR((1,2,8)) model to fit the TB incidence from September 2005 to  
37 235 December 2016, the fitting RMSE ,MAE and MAPE were 6.15, 4.33 and 0.2858,  
38 236 respectively; we used AR((1,2,8)) model to predict the TB incidence from January  
39 237 2017 to December 2017, the prediction RMSE, MAE and MAPE were 10.88 , 8.75

238 and 0.2029, respectively.

### 239 **Establishment of AR-Elman Model**

240 In order to improve the prediction accuracy of the AR((1,2,8)) model, we tried  
 241 to establish the AR((1,2,8))-Elman hybrid model. The fitting sequence of AR((1,2,8))  
 242 model was used as input variable, and the actual TB incidence was used as output  
 243 variable. Due to a little similarity of the annual trend of TB incidence in Kashgar (see  
 244 Figure 3), therefore, we created twelve time-lagged variables as input features.  
 245 Supposing that  $x_t$  represented the TB incidence at time t, and then the input matrix and  
 246 the output matrix of modeling data set used in this study were designed as follows  
 247 ( $N=12$ ):

$$248 \quad \text{input matrix} = \begin{bmatrix} x_1 & x_2 & \dots & x_i \\ x_2 & x_3 & \dots & x_{i+1} \\ \dots & \dots & \dots & \dots \\ x_N & x_{N+1} & \dots & \dots \end{bmatrix}, \text{output matrix} = [x_{N+1} \quad x_{N+2} \quad \dots \quad x_{N+i}]$$

249 We selected twelve as the number of input layers of AR-Elman network and  
 250 one as the number of output layers representing the forecast value. By the matlab  
 251 cyclic structure, we selected the optimal number of neurons between 1 and 20, and  
 252 finally we found when the number of neurons was 6 (see Figure 6), the RMSE was the  
 253 smallest, and the AR-Elman was optimal. We used the AR-Elman model to fit the  
 254 training data, RMSE was 3.78, MAE was 3.38, MAPE was 0.1837, and the  $R^2$  of the  
 255 model was 0.83; we used the AR-Elman model to predict the TB incidence from  
 256 January 2017 to December 2017, RMSE was 8.86, MAE was 7.29, and MAPE was  
 257 0.2006. The fitting curves of AR((1,2,8)) model and AR-Elman model, and the  
 258 prediction curve of AR-Elman model were shown in Figure 7. Comparison results of  
 259 the AR((1,2,8)) model and AR-Elman model were shown in Table 3, both the fitting  
 260 RMSE, MAE and MAPE and the predicting RMSE, MAE and MAPE of the  
 261 AR-Elman model were smaller than those of the single AR((1,2,8)) model, which  
 262 indicated that the AR-Elman combined model established in this study was more  
 263 suitable for predicting the TB incidence in Kashgar.

### 264 **Discussion**

265 According to the WHO 2019 Global Tuberculosis report <sup>4</sup>, around the world, TB  
 266 mortality was down about 3% every year, the incidence was down about 2% every  
 267 year, 16% of TB patients died of the disease. <sup>4</sup> But the rate of decline has not reached  
 268 the pace of the stop Tuberculosis Strategy Plan. Therefore, it is necessary to

1  
2  
3  
4 269 strengthen the prevention and control of tuberculosis. In order to significantly narrow  
5  
6 270 these gaps, greater progress must be made in a group of countries with a high burden  
7  
8 271 of tuberculosis. The burden of TB in China ranks second in the world, and Xinjiang is  
9  
10 272 the province with high incidence of TB in China, and Kashgar is the area with the  
11  
12 273 high TB incidence in Xinjiang. Therefore, it is urgent to do a good job in the  
13  
14 274 prevention and control of TB in Kashgar.

15  
16 275 The prediction and early warning of infectious diseases is an important link in  
17  
18 276 the prevention and control of infectious diseases.<sup>32-34</sup> Therefore, this study carried out  
19  
20 277 research from the point of view of prediction to explore an accurate prediction model  
21  
22 278 and do prediction analysis of TB incidence in Kashgar, so as to provide scientific  
23  
24 279 reference for the prevention and control of the disease in this area. The Box -Jenkins  
25  
26 280 method is a popular time series prediction method, this method has good prediction  
27  
28 281 performance and high prediction accuracy; Elman Neural network can capture  
29  
30 282 nonlinear information of time series data very well. In this study, the two methods  
31  
32 283 were combined to study the prediction model of TB incidence in Kashgar.

33  
34 284 Many studies have found that Box-Jenkins method has a good ability of fitting  
35  
36 285 and forecasting. For stationary time series that do not contain seasonality, it is more  
37  
38 286 suitable to use the ARMA model of the Box-Jenkins method to do prediction analysis  
39  
40 287 <sup>35</sup>, for non-stationary time series of infectious diseases with obvious seasonality, it is  
41  
42 288 more suitable to use seasonal autoregressive integrated moving average (SARIMA)  
43  
44 289 model of the Box-Jenkins method for prediction analysis.<sup>9-12</sup> In our study, from Figure  
45  
46 290 3, we could see that the seasonality of the TB incidence in Kashgar from 2005 to 2014  
47  
48 291 was not obvious, there was only a certain seasonality from 2015 to 2017, and we  
49  
50 292 found that the time series of TB incidence was stable by ADF unit root test, and the  
51  
52 293 autocorrelation and partial correlation coefficients of modeling data at lag 12, 24 were  
53  
54 294 not obviously large, therefore, for our research data, we used ARMA model to do  
55  
56 295 forecast analysis, finally, we established AR((1,2,8)) model of the Box-Jenkins  
57  
58 296 method, it has a good performance to fit and predict the TB incidence of Kashgar in  
59  
60 297 Xinjiang. From Figure 3, we can also see that the time series of TB incidence has  
298 strong non-linear, the established AR((1,2,8)) model mainly extracted the linear  
299 information of data, considering that the neural network can capture the non-linear  
300 information of data well, in order to improve the prediction accuracy of TB incidence

1  
2  
3  
4 301 in Kashgar, we used AR((1,2,8)) model and Elman neural network model to establish  
5 302 AR-Elman hybrid model. Many studies have found that the combination model could  
6  
7 303 improve accuracy of prediction, such as, Wang et al.<sup>28</sup> found that SARIMA-NAR  
8  
9 304 hybrid model had an outstanding ability to improve the prediction accuracy relative to  
10  
11 305 SARIMA model and nonlinear autoregressive network (NAR) model when they were  
12  
13 306 used to predict pertussis incidence in China. Li et al.<sup>27</sup> found ARIMA-GRNN hybrid  
14  
15 307 model was superior to single ARIMA model in predicting the short-term TB  
16  
17 308 incidence in Chinese population. Our research was consistent with these literatures  
18  
19 309 that our AR-Elman hybrid model was more accurate than the single AR((1,2,8))  
20  
21 310 model.

22  
23 311 In the past few years, Xinjiang's economic development was relatively backward,  
24  
25 312 medical resources were scarce, diagnosis and treatment were delayed, the continuous  
26  
27 313 spread of TB has become a difficult problem in the control of TB in Xinjiang. In  
28  
29 314 recent years, Xinjiang has introduced many new policies to increase investment in TB  
30  
31 315 prevention and control, and the relevant departments of disease prevention and control  
32  
33 316 in Xinjiang have also done a lot of effective work, which has helped to control  
34  
35 317 effectively rapid increase of the TB incidence in Xinjiang. In order to do a good job in  
36  
37 318 the prevention and control of TB in Xinjiang, many departments need to make joint  
38  
39 319 efforts. Our research was mainly to build a high-precision prediction model to help  
40  
41 320 early warning and prediction analysis of tuberculosis in Kashgar. Finally, we  
42  
43 321 established the AR-Elman hybrid model, which had high fitting and prediction  
44  
45 322 accuracy of TB incidence in Kashgar, Xinjiang.

46  
47 323 Our study found that Box-Jenkins and Elman neural network hybrid method was  
48  
49 324 an effective method for predicting the incidence of TB in Kashgar, it could provide a  
50  
51 325 scientific reference for prediction analysis of TB incidence. However, our study also  
52  
53 326 has some limitations: our method was only suitable for short-term prediction,  
54  
55 327 long-term prediction performance may decline, two main reasons: first, our model  
56  
57 328 was based on historical data characteristics; second, climatic factors, environmental  
58  
59 329 factors, demographic factors and political issues may have certain impacts on the  
60  
61 330 change of incidence. Therefore, if the established model becomes old and people will  
62  
63 331 want to obtain more accurate prediction results, it will be needed to adjust the model  
64  
65 332 parameters, update the model based on the new modeling sample data, and then to do  
66  
67 333 prediction analysis.

## 334 **Conclusions**

1  
2  
3  
4 335 Kashgar has a very high TB incidence, in order to provide some help for the  
5 336 prevention and control of this disease, the prediction problem of the TB incidence was  
6  
7 337 studied. Firstly, a single AR((1,2,8)) prediction model was established by using  
8  
9 338 Box-Jenkins method, and its fitting and prediction performance were good, secondly,  
10  
11 339 in order to improve the prediction accuracy of the single AR((1,2,8)) model, we used  
12  
13 340 single AR((1,2,8)) and Elman neural network with strong ability to capture nonlinear  
14  
15 341 information to establish AR-Elman hybrid model. The fitting and prediction accuracy  
16  
17 342 of the hybrid model was higher than that of the single AR((1,2,8)) model. The  
18  
19 343 AR-Elman hybrid model can provide scientific reference for predicting and warning  
20  
21 344 the TB incidence in Kashgar, Xinjiang.

22 345

## 23 346 **Acknowledgements**

24 347 We would like to express our gratitude to peer reviewers for carefully revising  
25  
26 348 our manuscript and for their very useful comments.

## 27 349 **Contributions**

28  
29 350 YLZ and XLZ analyzed the data and wrote the manuscript. XLZ, XJW, KW and  
30  
31 351 YC wrote and revised the manuscript. All authors read and approved the final  
32  
33 352 manuscript.

## 34 353 **Funding**

35  
36 354 This work was supported by Major projects of science and technology in  
37  
38 355 Xinjiang Autonomous region (Grant No.2017A03006), China, and National Natural  
39  
40 356 Science Foundation Project of China (Grant No. 72064036, 82060609),and State Key  
41  
42 357 Laboratory of Pathogenesis, Prevention and Treatment of High Incidence Diseases in  
43  
44 358 Central Asia Fund (Grant No. SKL-HIDCA-2020-9)

## 45 359 **Competing interests**

46 360 None declared.

## 47 361 **Patient consent for publication**

48 362 Not required.

## 49 363 **Provenance and peer review**

50 364 Not commissioned; externally peer reviewed.

## 51 365 **Data availability statement**

52 366 The data used in this study are available from the corresponding authors on  
53  
54 367 reasonable request.

## 55 368 **References**

56  
57  
58  
59  
60

- 1  
2  
3  
4 369 1. Kemal J, Sibhat B, Abraham A, et al. Bovine tuberculosis in eastern Ethiopia:  
5  
6 370 prevalence, risk factors and its public health importance. *BMC Infectious Diseases*,  
7  
8 371 2019; 19(1).
- 9  
10 372 2. Tilahun M, Ameni G, Desta K, et al. Molecular epidemiology and drug sensitivity  
11  
12 373 pattern of *Mycobacterium tuberculosis* strains isolated from pulmonary  
13  
14 374 tuberculosis patients in and around Ambo Town, Central Ethiopia. *Plos One*, 2018;  
15  
16 375 13(2):e0193083-.
- 17  
18 376 3. Reta A, Simachew A. The Role of Private Health Sector for Tuberculosis Control  
19  
20 377 in Debre Markos Town, Northwest Ethiopia. *Advances in Medicine*,  
21  
22 378 2018;2018(2):1-8.
- 23  
24 379 4. WHO. Global tuberculosis report 2019, [https://www.who.int/tb/publications/  
25  
26 380 global\\_report/en/](https://www.who.int/tb/publications/global_report/en/). (Accessed on 17 Oct 2019).
- 27  
28 381 5. Zhao YF, Shou MH, Wang ZX. Prediction of the Number of Patients Infected with  
29  
30 382 COVID-19 Based on Rolling Grey Verhulst Models. *Int J Environ Res Public  
31  
32 383 Health*. 2020; 17(12):4582.
- 33  
34 384 6. Guan P, Wu W, Huang D. Trends of reported human brucellosis cases in mainland  
35  
36 385 China from 2007 to 2017: an exponential smoothing time series analysis. *Environ  
37  
38 386 Health Prev Med*. 2018; 23(1):23.
- 39  
40 387 7. Zhang YQ, Li XX, Li WB, Jiang JG, Zhang GL, Zhuang Y, Xu JY, Shi J, Sun DY.  
41  
42 388 Analysis and predication of tuberculosis registration rates in Henan Province,  
43  
44 389 China: an exponential smoothing model study. *Infect Dis Poverty*. 2020;9(1):123.
- 45  
46 390 8. Martínez-Bello DA, López-Quílez A, Torres-Prieto A. Bayesian dynamic modeling  
47  
48 391 of time series of dengue disease case counts. *PLoS Negl Trop Dis*.  
49  
50 392 2017;11(7):e0005696.
- 51  
52 393 9. Wang Y, Xu C, Zhang S, Wang Z, Zhu Y, Yuan J. Temporal trends analysis of  
53  
54 394 human brucellosis incidence in mainland China from 2004 to 2018. *Sci Rep*.  
55  
56 395 2018;8(1):15901.
- 57  
58 396 10. Wang Y, Xu C, Li Y, Wu W, Gui L, Ren J, Yao S. An Advanced Data-Driven  
59  
60 397 Hybrid Model of SARIMA-NNNAR for Tuberculosis Incidence Time Series  
398 Forecasting in Qinghai Province, China. *Infect Drug Resist*. 2020;13:867-880.



- 1  
2  
3  
4 399 11. Aryee, Kwarteng , Essuman, Nkansa Agyei, et al. Estimating the incidence of  
5  
6 400 tuberculosis cases reported at a tertiary hospital in Ghana: a time series model  
7  
8 401 approach. BMC Public Health.2018;18(1):1292.
- 9  
10 402 12. Tohidinik H R , Mohebalı M , Mansournia M A, et al. Forecasting zoonotic  
11  
12 403 cutaneous leishmaniasis using meteorological factors in eastern Fars province, Iran:  
13  
14 404 A SARIMA Analysis. Tropical Medicine & International Health,  
15  
16 405 2018;23(8):860–869.
- 17  
18 406 13. Ouedraogo B, Inoue Y, Kambiré A, et al. Spatio-temporal dynamic of malaria in  
19  
20 407 Ouagadougou, Burkina Faso, 2011–2015. Malaria Journal, 2018;17(1):138.
- 21  
22 408 14. Wagenaar B H, Augusto O, Beste J, et al. The 2014–2015 Ebola virus disease  
23  
24 409 outbreak and primary healthcare delivery in Liberia: Time-series analyses for  
25  
26 410 2010–2016. Plos Medicine, 2018; 15(2):e1002508.
- 27  
28 411 15. Liu S, Chen J, Wang J, et al. Predicting the outbreak of hand, foot, and mouth  
29  
30 412 disease in Nanjing, China: a time-series model based on weather variability.  
31  
32 413 International Journal of Biometeorology, 2017;(6):1-10.
- 33  
34 414 16. Anokye R, Acheampong E, Owusu I, et al. Time series analysis of malaria in  
35  
36 415 Kumasi: Using ARIMA models to forecast future incidence. Cogent Social  
37  
38 416 Sciences, 2018; 4(1):1461544.
- 39  
40 417 17. Wang Y W , Shen Z Z , Jiang Y . Comparison of autoregressive integrated moving  
41  
42 418 average model and generalised regression neural network model for prediction of  
43  
44 419 haemorrhagic fever with renal syndrome in China: a time-series study. BMJ Open,  
45  
46 420 2019; 9(6):e025773.
- 47  
48 421 18. Guo W L , Geng J , Zhan Y , et al. Forecasting and predicting intussusception in  
49  
50 422 children younger than 48 months in Suzhou using a seasonal autoregressive  
51  
52 423 integrated moving average model. BMJ Open, 2019; 9(1).
- 53  
54 424 19. Gabriel A F B , Alencar A P , Miraglia S G E K . Dengue outbreaks: unpredictable  
55  
56 425 incidence time series. Epidemiology & Infection, 2019; 147.
- 57  
58 426 20. Tian C W , Wang H , Luo X M . Time-series modelling and forecasting of hand,  
59  
60 427 foot and mouth disease cases in China from 2008 to 2018. Epidemiology &  
428 Infection, 2019; 147.

- 1  
2  
3  
4 429 21. Juang W C , Huang S J , Huang F D , et al. Application of time series analysis in  
5 430 modelling and forecasting emergency department visits in a medical centre in  
6 431 Southern Taiwan. *Bmj Open*, 2017; 7(11):e018628.
- 9 432 22. Yu C, Li Y, Zhang M. An improved Wavelet Transform using Singular Spectrum  
11 433 Analysis for wind speed forecasting based on Elman Neural Network. *Energy*  
13 434 *Conversion & Management*, 2017; 148:895-904.
- 15 435 23. Huang Y, Shen L. Elman Neural Network Optimized by Firefly Algorithm for  
17 436 Forecasting China's Carbon Dioxide Emissions. *Communications in Computer*  
19 437 *and Information Science*, 2018;(951): 36-47.
- 21 438 24. Alkhasawneh M S. Hybrid Cascade Forward Neural Network with Elman Neural  
23 439 Network for Disease Prediction. *Arabian Journal for Science and Engineering*,  
25 440 2019;44(11): 9209–9220.
- 27 441 25. Mehrhini B, Izadi H, Memarian H. Shear wave velocity prediction using Elman  
29 442 artificial neural network. *Carbonates & Evaporites*, 2017;(6):1-11.
- 31 443 26. Khalaf M, Hussain A J, Keight R, et al. Machine learning approaches to the  
33 444 application of disease modifying therapy for sickle cell using classification  
35 445 models. *Neurocomputing*, 2017; 228(C):154-164.
- 37 446 27. Li Z, Wang Z, Song H, Liu Q, He B, Shi P, Ji Y, Xu D, Wang J. Application of a  
39 447 hybrid model in predicting the incidence of tuberculosis in a Chinese population.  
41 448 *Infect Drug Resist.* 2019;12:1011-1020.
- 43 449 28. Wang Y, Xu C, Wang Z, Zhang S, Zhu Y, Yuan J. Time series modeling of  
45 450 pertussis incidence in China from 2004 to 2018 with a novel wavelet based  
47 451 SARIMA-NAR hybrid model. *PLoS One*. 2018;13(12):e0208404.
- 49 452 29. Wang Y, Xu C, Zhang S, Wang Z, Yang L, Zhu Y, Yuan J. Temporal trends  
51 453 analysis of tuberculosis morbidity in mainland China from 1997 to 2025 using a  
53 454 new SARIMA-NARNNX hybrid model. *BMJ Open*. 2019;9(7):e024409.
- 55 455 30. Box G E, Jenkins G M. *Time series analysis: forecasting and control rev. ed.*  
57 456 *Oakland, California, Holden-Day*, 1976; 31(4):238-242.

- 1  
2  
3  
4 457 31. Ming Cheng. The principle and example of MATLAB neural network. Tsinghua  
5 458 University Press, 2013.
- 6  
7  
8 459 32. Huppert A, Katriel G. Mathematical modelling and prediction in infectious  
9 460 disease epidemiology. Clin Microbiol Infect. 2013;19(11):999-1005
- 10  
11 461 33. Wearing HJ1, Rohani P, Keeling MJ. Appropriate models for the management of  
12 462 infectious diseases. PLoS Med. 2005; 2(7):e174.
- 13  
14 463 34. Neuberger A, Paul M, Nizar A, Raoult D. Modelling in infectious diseases:  
15 464 between haphazard and hazard. Clin Microbiol Infect. 2013;19(11):993-8.
- 16  
17 465 35. Tipirneni-Sajja A, Krafft AJ, Loeffler RB, Song R, Bahrami A, Hankins JS,  
18 466 Hillenbrand CM. Autoregressive moving average modeling for hepatic iron  
19 467 quantification in the presence of fat. J Magn Reson Imaging.  
20 468 2019;50(5):1620-1632.
- 21  
22  
23  
24  
25  
26  
27  
28 469

## 30 470 **Figures**

- 31  
32 471 **Figure 1.** The red part of this picture is the location of Kashgar in Xinjiang, China.  
33  
34 472 Kashgar is located in the south of Xinjiang, and it has a very high incidence of  
35 473 tuberculosis.  
36  
37  
38 474
- 39  
40 475 **Figure 2.** The Structure diagram of Elman neural network.  $w^1$ ,  $w^2$  and  $w^3$  are the  
41 476 connection weight matrixes.  $x_c(k)$  and  $x(k)$  represent the output of the contact unit and  
42 477 the hidden layer unit, respectively,  $y(k)$  represents the output of the output unit,  $u(k-1)$   
43 478 represents the input of the input unit.  
44  
45  
46  
47  
48 479
- 49  
50 480 **Figure 3.** Graph of the tuberculosis (TB) incidence in Kashgar from January 2005 to  
51 481 December 2017. The curve of TB incidence showed strong nonlinear characteristics  
52 482 from 2005 to 2014, and the TB incidence increased significantly from 2015 to 2017.  
53  
54  
55 483
- 56  
57 484 **Figure 4.** Autocorrelation function (ACF) and partial autocorrelation function (PACF)  
58 485 graphs of modeling data. As the delay of the lag order, the autocorrelation coefficients

486 were trailing and the partial correlation coefficients were truncated, so it was suitable  
487 to establish the AR model.

488

489 **Figure 5.** Autocorrelation function (ACF) and partial autocorrelation function (PACF)  
490 graphs of residuals of AR((1,2,8)) model. Autocorrelation coefficients and partial  
491 correlation coefficients were almost in 95% confidence interval, so AR ((1,2,8))  
492 model could extract the information of original data well.

493

494 **Figure 6.** The numbers of neurons in AR-Elman model and the corresponding root  
495 mean square error (RMSE). When the number of neuron was 6, the RMSE was the  
496 smallest, and the AR-Elman model fitting ability was the strongest.

497

498 **Figure 7.** The fitting curves of AR((1,2,8)) model and AR-Elman model, and the  
499 prediction curve of AR-Elman model. Red line stands for the original tuberculosis  
500 (TB) incidence curve, green line stands for AR((1,2,8)) model fitting curve, blue line  
501 stands for AR-Elman model fitting curve. Blue dotted line stands for prediction curve  
502 of AR-Elman model, black dotted line stands for predicted curve of confidence  
503 intervals. The fitting ability of AR-Elman hybrid model was slightly better than that  
504 of the single AR((1,2,8)).

505

506

## 507 Tables

508 **Table 1.** The Augmented Dickey-Fuller (ADF) test of the training data

|                                        | t-Statistics | p-value |
|----------------------------------------|--------------|---------|
| Augmented Dickey-Fuller test statistic | -3.47        | 0.01    |
| Test critical values:                  |              |         |
| 1% level                               | -3.48        |         |
| 5% level                               | -2.88        |         |
| 10% level                              | -2.58        |         |

509

510

511 **Table 2.** Parameter estimates of the tentative models with their Akaike information  
 512 criterion (AIC) and Schwarz criterion (SC) values.

| Models        | Variables | Coefficients | Std. Errors | t    | p-values | AIC  | SC   |
|---------------|-----------|--------------|-------------|------|----------|------|------|
| AR (2)        | C         | 21.42        | 2.17        | 9.86 | <0.01    | 6.55 | 6.62 |
|               | AR(1)     | 0.42         | 0.08        | 5.20 | <0.01    |      |      |
|               | AR(2)     | 0.34         | 0.08        | 4.17 | <0.01    |      |      |
| AR((1, 2, 7)) | C         | 22.93        | 3.73        | 6.14 | <0.00    | 6.53 | 6.62 |
|               | AR(1)     | 0.41         | 0.08        | 5.10 | <0.00    |      |      |
|               | AR(2)     | 0.32         | 0.08        | 3.88 | <0.00    |      |      |
|               | AR (7)    | 0.12         | 0.007       | 1.74 | 0.08     |      |      |
| AR((1, 2, 8)) | C         | 23.53        | 4.56        | 5.16 | <0.01    | 6.53 | 6.61 |
|               | AR(1)     | 0.40         | 0.08        | 4.84 | <0.01    |      |      |
|               | AR(2)     | 0.32         | 0.08        | 3.96 | <0.01    |      |      |
|               | AR (8)    | 0.15         | 0.07        | 2.17 | 0.03     |      |      |
| AR((1, 2, 9)) | C         | 29.07        | 15.53       | 1.87 | 0.06     | 6.46 | 6.55 |
|               | AR(1)     | 0.37         | 0.08        | 4.64 | <0.01    |      |      |
|               | AR (2)    | 0.31         | 0.08        | 3.93 | <0.01    |      |      |
|               | AR (9)    | 0.26         | 0.07        | 3.80 | <0.01    |      |      |

513

514 Table 3. Comparison results of in-sample fitting and out-of-sample forecasting  
 515 performance for the AR((1,2,8)) model and AR-Elman model.

| Models      | Fitted efficacy |      |        | Models      | Forecasted efficacy |      |        |
|-------------|-----------------|------|--------|-------------|---------------------|------|--------|
|             | RMSE            | MAE  | MAPE   |             | RMSE                | MAE  | MAPE   |
| AR((1,2,8)) | 6.15            | 4.33 | 0.2585 | AR((1,2,8)) | 10.88               | 8.75 | 0.2029 |
| AR-Elman    | 3.78            | 3.38 | 0.1837 | AR-Elman    | 8.86                | 7.29 | 0.2006 |

516

1  
2  
3  
4  
5  
6  
7  
8  
9  
10  
11  
12  
13  
14  
15  
16  
17  
18  
19  
20  
21  
22  
23  
24  
25  
26  
27  
28  
29  
30  
31  
32  
33  
34  
35  
36  
37  
38  
39  
40  
41  
42  
43  
44  
45  
46  
47  
48  
49  
50  
51  
52  
53  
54  
55  
56  
57  
58  
59  
60



Figure 1



Figure 2

1  
2  
3  
4  
5  
6  
7  
8  
9  
10  
11  
12  
13  
14  
15  
16  
17  
18  
19  
20  
21  
22  
23  
24  
25  
26  
27  
28  
29  
30  
31  
32  
33  
34  
35  
36  
37  
38  
39  
40  
41  
42  
43  
44  
45  
46  
47  
48  
49  
50  
51  
52  
53  
54  
55  
56  
57  
58  
59  
60



Figure 3





Figure 4

1  
2  
3  
4  
5  
6  
7  
8  
9  
10  
11  
12  
13  
14  
15  
16  
17  
18  
19  
20  
21  
22  
23  
24  
25  
26  
27  
28  
29  
30  
31  
32  
33  
34  
35  
36  
37  
38  
39  
40  
41  
42  
43  
44  
45  
46  
47  
48  
49  
50  
51  
52  
53  
54  
55  
56  
57  
58  
59  
60



Figure 5

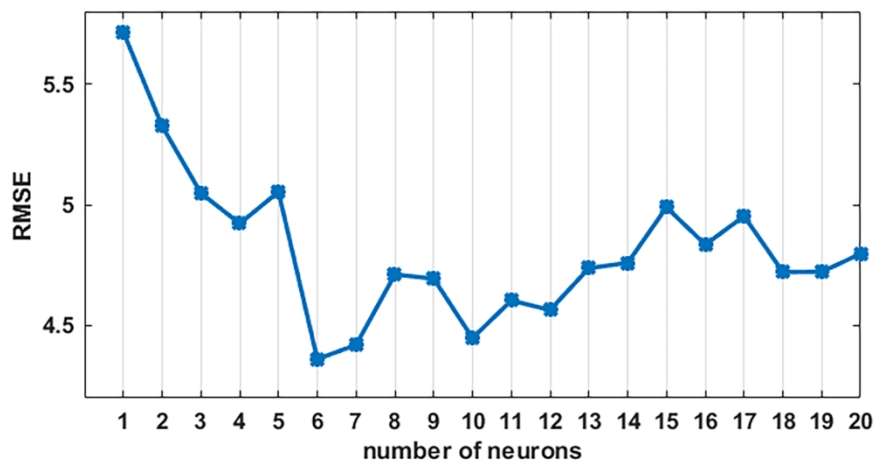

Figure 6

1  
2  
3  
4  
5  
6  
7  
8  
9  
10  
11  
12  
13  
14  
15  
16  
17  
18  
19  
20  
21  
22  
23  
24  
25  
26  
27  
28  
29  
30  
31  
32  
33  
34  
35  
36  
37  
38  
39  
40  
41  
42  
43  
44  
45  
46  
47  
48  
49  
50  
51  
52  
53  
54  
55  
56  
57  
58  
59  
60



Figure 7
